# Supplementary material for: Cell-specific characterization of the placental methylome
Source: BMC Genomics. 2021 Jan 6;22:6. doi: 10.1186/s12864-020-07186-6 (PMC7788826; doi:10.1186/s12864-020-07186-6)
Supplement: Supplementary file 7 — Additional file 7 Table S5 GO enrichment for cell DMCs. Table S6 KEGG enrichment for cell DMCs. Table S7 List of imprinted genes and regions from multiple studies. Table S8 Linear modelling results of repetitive element methylation and cell type. Table S9 600 reference probes for cell deconvolution for term/third trimester. Table S10 600 reference probes for cell deconvolution for first trimester. Table S11 Performance metrics for deconvolution algorithms on in-silico mixtures. Table S12 Statistical testing results for cell composition versus sex, ethnicity, and gestational age. Each cell type proportion was tested against each sample variable. [file 12864_2020_7186_MOESM7_ESM.xlsx]

## Sheet: s5
Group	Celltype	ONTOLOGY	TERM	N	DE	P.DE	FDR	ID	Generatio	neg_log_P	Order
First	Endothelial	CC	cytoplasm	10837	2444.5	3.15886e-05	0.00548557	GO:0005737	0.22557	4.50047	1
First	Endothelial	BP	response to biotic stimulus	909	206.333	0.000453168	0.0408028	GO:0009607	0.226989	3.34374	2
First	Endothelial	CC	cytoplasmic part	9146	2076.67	0.000128524	0.0158902	GO:0044444	0.227057	3.89101	3
First	Endothelial	BP	response to stimulus	8475	1938.67	6.90944e-08	3.14366e-05	GO:0050896	0.228751	7.16056	4
First	Endothelial	BP	defense response	1573	366.5	1.01022e-06	0.000283722	GO:0006952	0.232994	5.99558	5
First	Endothelial	BP	response to external biotic stimulus	878	204.833	9.28696e-05	0.0125873	GO:0043207	0.233295	4.03213	6
First	Endothelial	BP	response to other organism	877	204.833	8.85441e-05	0.0122823	GO:0051707	0.233561	4.05284	7
First	Endothelial	BP	cellular response to stimulus	7030	1650.33	3.82095e-08	1.84942e-05	GO:0051716	0.234756	7.41783	8
First	Endothelial	BP	localization	6282	1478.42	0.0005498	0.0456084	GO:0051179	0.235343	3.2598	9
First	Endothelial	BP	cell communication	6124	1461.33	3.72103e-06	0.000972986	GO:0007154	0.238624	5.42934	10
First	Endothelial	BP	signaling	6096	1456.83	5.78792e-06	0.00139585	GO:0023052	0.238982	5.23748	11
First	Endothelial	BP	positive regulation of biological process	5803	1387	0.000453783	0.0408028	GO:0048518	0.239014	3.34315	12
First	Endothelial	BP	signal transduction	5647	1350.33	1.32075e-07	5.18031e-05	GO:0007165	0.239124	6.87918	13
First	Endothelial	BP	response to stress	3765	907	1.30179e-08	7.79324e-06	GO:0006950	0.240903	7.88546	14
First	Endothelial	BP	regulation of defense response	798	192.5	0.000233298	0.0257636	GO:0031347	0.241228	3.63209	15
First	Endothelial	BP	response to external stimulus	2275	549.667	0.000418229	0.038676	GO:0009605	0.241612	3.37859	16
First	Endothelial	CC	vesicle	3654	898.924	6.07993e-07	0.000186909	GO:0031982	0.246011	6.2161	17
First	Endothelial	BP	response to bacterium	585	145.333	1.58345e-05	0.00327473	GO:0009617	0.248433	4.80039	18
First	Endothelial	CC	response to bacterium	4181	1041	1.20248e-07	4.97369e-05	GO:0012505	0.248983	6.91992	19
First	Endothelial	BP	regulation of molecular function	2821	719.5	8.23981e-05	0.0115708	GO:0065009	0.255051	4.08408	20
First	Endothelial	BP	regulation of response to stimulus	4007	1023.5	2.41043e-08	1.26125e-05	GO:0048583	0.255428	7.61791	21
First	Endothelial	BP	cell surface receptor signaling pathway	2796	716.833	0.000462973	0.0413026	GO:0007166	0.256378	3.33444	22
First	Endothelial	BP	regulation of signal transduction	3004	774	0.000114931	0.0147715	GO:0009966	0.257656	3.93956	23
First	Endothelial	BP	regulation of phosphorus metabolic process	1725	447	0.000437846	0.0398422	GO:0051174	0.25913	3.35868	24
First	Endothelial	BP	regulation of signaling	3411	884	0.000100118	0.0133192	GO:0023051	0.259162	3.99949	25
First	Endothelial	BP	positive regulation of response to stimulus	2276	590.167	1.59686e-06	0.000437675	GO:0048584	0.2593	5.79673	26
First	Endothelial	BP	regulation of cell communication	3364	872.5	0.000112165	0.0145309	GO:0010646	0.259364	3.95014	27
First	Endothelial	BP	regulation of phosphate metabolic process	1723	447	0.000386402	0.0369338	GO:0019220	0.259431	3.41296	28
First	Endothelial	BP	regulation of phosphorylation	1531	397.833	0.000554123	0.0456084	GO:0042325	0.259852	3.25639	29
First	Endothelial	CC	bounding membrane of organelle	1961	510.167	0.00013487	0.0165847	GO:0098588	0.260156	3.87008	30
First	Endothelial	BP	regulation of localization	2718	707.5	5.95604e-05	0.00920013	GO:0032879	0.260302	4.22504	31
First	Endothelial	BP	regulation of inflammatory response	400	104.5	5.9854e-05	0.00920013	GO:0050727	0.26125	4.22291	32
First	Endothelial	BP	positive regulation of cell communication	1763	462.167	0.000372512	0.0362148	GO:0010647	0.262148	3.42886	33
First	Endothelial	BP	positive regulation of signaling	1770	464.167	0.000359558	0.0352568	GO:0023056	0.262241	3.44423	34
First	Endothelial	MF	anion binding	2632	693.333	0.000382554	0.0367203	GO:0043168	0.263425	3.41731	35
First	Endothelial	MF	carbohydrate derivative binding	2108	557	0.000491324	0.0425428	GO:0097367	0.264231	3.30863	36
First	Endothelial	BP	positive regulation of signal transduction	1609	425.167	0.000170407	0.0204031	GO:0009967	0.264243	3.76851	37
First	Endothelial	CC	cytoplasmic vesicle lumen	323	85.5	0.000475128	0.0418941	GO:0060205	0.264706	3.32319	38
First	Endothelial	CC	secretory granule	802	212.5	9.86285e-07	0.000280462	GO:0030141	0.264963	6.006	39
First	Endothelial	BP	regulation of response to external stimulus	813	215.833	2.95836e-05	0.00534125	GO:0032101	0.265478	4.52895	40
First	Endothelial	MF	nucleotide binding	2010	534	0.000580988	0.0470352	GO:0000166	0.265672	3.23583	41
First	Endothelial	BP	immune system process	2762	734	2.12624e-16	2.41849e-12	GO:0002376	0.265749	15.6724	42
First	Endothelial	BP	positive regulation of multicellular organismal process	1728	459.333	0.000124474	0.0155585	GO:0051240	0.265818	3.90492	43
First	Endothelial	BP	positive regulation of immune response	754	200.5	6.62204e-05	0.00991084	GO:0050778	0.265915	4.17901	44
First	Endothelial	MF	nucleoside phosphate binding	2011	535	0.000503838	0.0427679	GO:1901265	0.266037	3.29771	45
First	Endothelial	CC	secretory vesicle	950	252.833	4.55078e-06	0.00116321	GO:0099503	0.26614	5.34191	46
First	Endothelial	CC	vesicle lumen	324	86.5	0.000375178	0.0363188	GO:0031983	0.266975	3.42576	47
First	Endothelial	CC	cytoplasmic vesicle part	1428	381.333	1.06817e-05	0.00233652	GO:0044433	0.26704	4.97136	48
First	Endothelial	BP	inflammatory response	748	200	6.92447e-09	5.25083e-06	GO:0006954	0.26738	8.15961	49
First	Endothelial	BP	regulation of immune system process	1472	394	7.37022e-10	9.23786e-07	GO:0002682	0.267663	9.13252	50
First	Endothelial	BP	intracellular signal transduction	2794	750	2.4275e-08	1.26125e-05	GO:0035556	0.268432	7.61484	51
First	Endothelial	BP	regulation of catalytic activity	2206	592.667	7.33726e-07	0.000213994	GO:0050790	0.268661	6.13447	52
First	Endothelial	BP	hematopoietic or lymphoid organ development	893	241.333	0.000495786	0.0427221	GO:0048534	0.27025	3.30471	53
First	Endothelial	BP	positive regulation of immune system process	1020	276	1.25583e-07	5.01209e-05	GO:0002684	0.270588	6.90107	54
First	Endothelial	BP	hemopoiesis	851	230.333	0.000503802	0.0427679	GO:0030097	0.270662	3.29774	55
First	Endothelial	MF	purine nucleotide binding	1790	484.5	0.000601726	0.048102	GO:0017076	0.27067	3.2206	56
First	Endothelial	BP	movement of cell or subcellular component	2050	555.167	0.000203695	0.0228269	GO:0006928	0.270813	3.69102	57
First	Endothelial	CC	intracellular vesicle	2201	596.167	2.41168e-09	2.11012e-06	GO:0097708	0.270862	8.61768	58
First	Endothelial	MF	purine ribonucleotide binding	1778	482	0.000577776	0.0469422	GO:0032555	0.271091	3.23824	59
First	Endothelial	CC	cytoplasmic vesicle	2198	596.167	2.03861e-09	1.93234e-06	GO:0031410	0.271231	8.69067	60
First	Endothelial	CC	whole membrane	1581	429	5.17589e-05	0.008234	GO:0098805	0.271347	4.28602	61
First	Endothelial	MF	ribonucleotide binding	1794	487	0.000467397	0.0415344	GO:0032553	0.27146	3.33031	62
First	Endothelial	BP	immune system development	944	256.333	0.000171607	0.0204352	GO:0002520	0.27154	3.76547	63
First	Endothelial	BP	immune response	1897	515.167	2.20012e-17	5.00506e-13	GO:0006955	0.271569	16.6576	64
First	Endothelial	BP	regulation of intracellular signal transduction	1856	504.833	2.12141e-07	7.73392e-05	GO:1902531	0.272001	6.67337	65
First	Endothelial	BP	positive regulation of intracellular signal transduction	1031	280.833	3.0959e-05	0.00548557	GO:1902533	0.272389	4.50921	66
First	Endothelial	BP	secretion	1585	433	9.35673e-09	6.45019e-06	GO:0046903	0.273186	8.02888	67
First	Endothelial	BP	response to molecule of bacterial origin	331	90.5	0.000324022	0.0323739	GO:0002237	0.273414	3.48943	68
First	Endothelial	BP	response to lipopolysaccharide	320	87.5	0.000462647	0.0413026	GO:0032496	0.273438	3.33475	69
First	Endothelial	BP	regulation of immune response	957	262.167	1.73393e-08	9.62079e-06	GO:0050776	0.273946	7.76097	70
First	Endothelial	BP	negative regulation of cytokine production	278	76.3333	0.000482962	0.0422573	GO:0001818	0.27458	3.31609	71
First	Endothelial	CC	Golgi apparatus	1456	400	0.00027852	0.0291076	GO:0005794	0.274725	3.55514	72
First	Endothelial	CC	secretory granule lumen	306	84.5	0.000198156	0.0223161	GO:0034774	0.276144	3.70299	73
First	Endothelial	BP	positive regulation of response to external stimulus	309	85.5	0.000238563	0.0261308	GO:0032103	0.276699	3.6224	74
First	Endothelial	BP	regulation of cellular component organization	2393	662.667	7.27063e-06	0.0016707	GO:0051128	0.276919	5.13843	75
First	Endothelial	BP	activation of immune response	584	163	8.20241e-05	0.0115708	GO:0002253	0.27911	4.08606	76
First	Endothelial	BP	angiogenesis	563	157.5	0.000577486	0.0469422	GO:0001525	0.279751	3.23846	77
First	Endothelial	BP	peptide secretion	597	167.5	0.000125839	0.0156433	GO:0002790	0.28057	3.90018	78
First	Endothelial	BP	secretion by cell	1454	408.5	8.88624e-10	9.62633e-07	GO:0032940	0.280949	9.05128	79
First	Endothelial	BP	regulation of immune effector process	379	106.5	3.45352e-05	0.00581956	GO:0002697	0.281003	4.46174	80
First	Endothelial	BP	vesicle-mediated transport	1909	536.591	2.22456e-09	2.02426e-06	GO:0016192	0.281085	8.65276	81
First	Endothelial	BP	positive regulation of cytokine production	443	125	9.13229e-06	0.00203677	GO:0001819	0.282167	5.03942	82
First	Endothelial	BP	locomotion	1822	514.167	2.51791e-07	8.81228e-05	GO:0040011	0.282199	6.59896	83
First	Endothelial	BP	exocytosis	857	242.5	3.51608e-06	0.000930085	GO:0006887	0.282964	5.45394	84
First	Endothelial	BP	regulation of hydrolase activity	1219	345.167	4.66718e-06	0.00117971	GO:0051336	0.283156	5.33095	85
First	Endothelial	BP	regulation of peptide secretion	480	136	0.000278934	0.0291076	GO:0002791	0.283333	3.5545	86
First	Endothelial	BP	positive regulation of cellular component organization	1205	342.667	0.000316856	0.0321793	GO:0051130	0.284371	3.49914	87
First	Endothelial	BP	adaptive immune response	392	111.5	1.1664e-05	0.00247986	GO:0002250	0.284439	4.93315	88
First	Endothelial	BP	immune effector process	1113	317.5	8.41929e-13	2.73615e-09	GO:0002252	0.285265	12.0747	89
First	Endothelial	BP	protein secretion	566	161.5	5.42577e-05	0.00857159	GO:0009306	0.285336	4.26554	90
First	Endothelial	BP	regulation of anatomical structure morphogenesis	1100	314.833	0.000288211	0.0298024	GO:0022603	0.286212	3.54029	91
First	Endothelial	BP	regulation of protein secretion	454	130	0.000214412	0.0239101	GO:0050708	0.286344	3.66875	92
First	Endothelial	BP	leukocyte mediated immunity	739	212	2.82028e-10	4.75096e-07	GO:0002443	0.286874	9.54971	93
First	Endothelial	MF	enzyme binding	2112	607.5	2.43945e-08	1.26125e-05	GO:0019899	0.287642	7.61271	94
First	Endothelial	BP	regulated exocytosis	755	217.5	4.20749e-07	0.000134812	GO:0045055	0.288079	6.37598	95
First	Endothelial	BP	regulation of cytokine production	683	196.833	1.20132e-08	7.38616e-06	GO:0001817	0.288189	7.92034	96
First	Endothelial	BP	cell motility	1600	461.667	1.05127e-08	6.83296e-06	GO:0048870	0.288542	7.97829	97
First	Endothelial	BP	localization of cell	1600	461.667	1.05127e-08	6.83296e-06	GO:0051674	0.288542	7.97829	98
First	Endothelial	BP	regulation of kinase activity	835	241.5	0.00031086	0.0318548	GO:0043549	0.289222	3.50743	99
First	Endothelial	BP	regulation of lymphocyte activation	399	115.5	0.000108242	0.0143162	GO:0051249	0.289474	3.96561	100
First	Endothelial	BP	positive regulation of molecular function	1671	484.667	3.68683e-08	1.8233e-05	GO:0044093	0.290046	7.43335	101
First	Endothelial	MF	adenyl nucleotide binding	1468	426	7.46479e-05	0.0108163	GO:0030554	0.290191	4.12698	102
First	Endothelial	MF	adenyl ribonucleotide binding	1457	423.5	9.29565e-05	0.0125873	GO:0032559	0.290666	4.03172	103
First	Endothelial	MF	ATP binding	1402	408.5	0.000117518	0.014906	GO:0005524	0.291369	3.9299	104
First	Endothelial	BP	cellular response to biotic stimulus	229	67	0.000137603	0.0167397	GO:0071216	0.292576	3.86137	105
First	Endothelial	CC	endosome	849	248.5	5.90663e-05	0.00920013	GO:0005768	0.292697	4.22866	106
First	Endothelial	BP	response to wounding	651	191	0.000348323	0.0343031	GO:0009611	0.293395	3.45802	107
First	Endothelial	BP	positive regulation of protein secretion	259	76	0.000406152	0.0380228	GO:0050714	0.293436	3.39131	108
First	Endothelial	BP	regulation of cellular component movement	1035	303.833	1.09612e-05	0.00235241	GO:0051270	0.293559	4.96014	109
First	Endothelial	BP	cell activation	1310	385.5	5.82774e-14	3.31438e-10	GO:0001775	0.294275	13.2345	110
First	Endothelial	BP	positive regulation of catalytic activity	1343	396	1.48039e-07	5.70802e-05	GO:0043085	0.294862	6.82962	111
First	Endothelial	BP	tumor necrosis factor production	158	46.8333	0.000617315	0.0485928	GO:0032640	0.296414	3.20949	112
First	Endothelial	BP	immune response-regulating signaling pathway	540	160.5	2.03269e-05	0.00392124	GO:0002764	0.297222	4.69193	113
First	Endothelial	BP	regulation of locomotion	1023	304.333	2.95773e-07	0.000100426	GO:0040012	0.297491	6.52904	114
First	Endothelial	BP	wound healing	540	161	0.000413447	0.0384999	GO:0042060	0.298148	3.38358	115
First	Endothelial	BP	regulation of cell activation	524	156.5	6.63832e-07	0.000198704	GO:0050865	0.298664	6.17794	116
First	Endothelial	BP	cytokine production	751	224.333	6.38168e-11	1.61308e-07	GO:0001816	0.298713	10.1951	117
First	Endothelial	CC	secretory granule membrane	286	85.5	0.00048193	0.0422573	GO:0030667	0.298951	3.31702	118
First	Endothelial	BP	lymphocyte activation	632	189	6.38748e-08	3.02727e-05	GO:0046649	0.299051	7.19467	119
First	Endothelial	BP	cell adhesion	1357	405.833	3.09539e-07	0.000102054	GO:0007155	0.299067	6.50928	120
First	Endothelial	BP	myeloid leukocyte migration	197	59	7.34356e-05	0.0107771	GO:0097529	0.299492	4.13409	121
First	Endothelial	BP	biological adhesion	1363	408.833	1.90811e-07	7.11601e-05	GO:0022610	0.299951	6.7194	122
First	Endothelial	BP	leukocyte activation	1161	348.5	4.4754e-15	3.3937e-11	GO:0045321	0.300172	14.3492	123
First	Endothelial	BP	immune response-activating signal transduction	508	152.5	1.74643e-05	0.00345474	GO:0002757	0.300197	4.75785	124
First	Endothelial	BP	cell migration	1450	435.667	2.9238e-10	4.75096e-07	GO:0016477	0.30046	9.53405	125
First	Endothelial	BP	regulation of tumor necrosis factor production	155	46.8333	0.000426617	0.0389763	GO:0032680	0.302151	3.36996	126
First	Endothelial	BP	lymphocyte differentiation	337	101.833	0.000332649	0.0329019	GO:0030098	0.302176	3.47801	127
First	Endothelial	BP	leukocyte differentiation	492	148.833	1.70347e-05	0.00339931	GO:0002521	0.302507	4.76867	128
First	Endothelial	BP	regulation of tumor necrosis factor superfamily cytokine production	158	47.8333	0.000378323	0.036468	GO:1903555	0.302743	3.42214	129
First	Endothelial	BP	regulation of cell motility	952	288.833	1.15624e-07	4.91732e-05	GO:2000145	0.303396	6.93695	130
First	Endothelial	BP	cellular response to lipopolysaccharide	201	61	6.51133e-05	0.00980968	GO:0071222	0.303483	4.18633	131
First	Endothelial	BP	regulation of leukocyte activation	482	146.5	2.60131e-07	8.96623e-05	GO:0002694	0.303942	6.58481	132
First	Endothelial	BP	regulation of T cell activation	301	91.5	0.000179698	0.0209638	GO:0050863	0.303987	3.74546	133
First	Endothelial	BP	taxis	616	187.333	0.000555344	0.0456084	GO:0042330	0.304113	3.25544	134
First	Endothelial	BP	cellular response to molecule of bacterial origin	207	63	3.58295e-05	0.00594953	GO:0071219	0.304348	4.44576	135
First	Endothelial	BP	import into cell	813	248	2.18589e-05	0.00417872	GO:0098657	0.305043	4.66037	136
First	Endothelial	BP	chemotaxis	614	187.333	0.000500816	0.0427679	GO:0006935	0.305103	3.30032	137
First	Endothelial	BP	cell chemotaxis	284	86.8333	1.70019e-05	0.00339931	GO:0060326	0.305751	4.7695	138
First	Endothelial	MF	kinase binding	705	216	0.000289568	0.0298072	GO:0019900	0.306383	3.53825	139
First	Endothelial	CC	side of membrane	487	149.5	2.29121e-05	0.00430766	GO:0098552	0.306982	4.63994	140
First	Endothelial	BP	myeloid leukocyte mediated immunity	529	162.5	1.75327e-09	1.81296e-06	GO:0002444	0.307183	8.75615	141
First	Endothelial	BP	cytoskeleton organization	1264	389.333	1.25152e-07	5.01209e-05	GO:0007010	0.308017	6.90256	142
First	Endothelial	BP	neutrophil mediated immunity	480	148.5	3.80012e-09	2.98099e-06	GO:0002446	0.309375	8.4202	143
First	Endothelial	BP	positive regulation of lymphocyte activation	253	78.5	0.000414632	0.0384999	GO:0051251	0.310277	3.38234	144
First	Endothelial	MF	protein kinase binding	630	195.5	0.000326158	0.0324007	GO:0019901	0.310317	3.48657	145
First	Endothelial	BP	positive regulation of immune effector process	206	64	0.000117943	0.014906	GO:0002699	0.31068	3.92833	146
First	Endothelial	BP	positive regulation of hydrolase activity	723	225	5.61275e-06	0.00137295	GO:0051345	0.311203	5.25082	147
First	Endothelial	BP	T cell activation	443	138	7.7057e-07	0.000221895	GO:0042110	0.311512	6.11319	148
First	Endothelial	BP	positive regulation of vasculature development	223	69.5	0.000122874	0.0154434	GO:1904018	0.311659	3.91054	149
First	Endothelial	BP	leukocyte activation involved in immune response	675	211	4.94837e-13	1.87617e-09	GO:0002366	0.312593	12.3055	150
First	Endothelial	BP	regulation of cell migration	895	279.833	1.44797e-08	8.44614e-06	GO:0030334	0.312663	7.83924	151
First	Endothelial	BP	leukocyte degranulation	512	160.5	7.71548e-10	9.23786e-07	GO:0043299	0.313477	9.11264	152
First	Endothelial	BP	neutrophil degranulation	466	146.5	2.01029e-09	1.93234e-06	GO:0043312	0.314378	8.69674	153
First	Endothelial	BP	immune response-regulating cell surface receptor signaling pathway	380	119.5	6.71078e-05	0.00997801	GO:0002768	0.314474	4.17323	154
First	Endothelial	BP	myeloid cell activation involved in immune response	523	164.5	2.3604e-10	4.47473e-07	GO:0002275	0.314532	9.62701	155
First	Endothelial	BP	endocytosis	693	218	2.25457e-06	0.000603401	GO:0006897	0.314574	5.64694	156
First	Endothelial	BP	granulocyte activation	484	152.5	5.71934e-10	8.13184e-07	GO:0036230	0.315083	9.24265	157
First	Endothelial	BP	cell activation involved in immune response	679	214	2.00117e-13	9.10491e-10	GO:0002263	0.315169	12.6987	158
First	Endothelial	BP	granulocyte migration	130	41	3.42592e-05	0.00581956	GO:0097530	0.315385	4.46522	159
First	Endothelial	BP	myeloid leukocyte activation	625	197.5	5.05352e-12	1.43703e-08	GO:0002274	0.316	11.2964	160
First	Endothelial	BP	regulation of leukocyte differentiation	261	82.5	0.000255137	0.0275076	GO:1902105	0.316092	3.59323	161
First	Endothelial	BP	lymphocyte activation involved in immune response	169	53.5	0.000175734	0.0206071	GO:0002285	0.316568	3.75514	162
First	Endothelial	BP	immune response-activating cell surface receptor signaling pathway	349	110.5	8.83015e-05	0.0122823	GO:0002429	0.316619	4.05403	163
First	Endothelial	BP	neutrophil activation involved in immune response	469	148.5	8.15547e-10	9.27644e-07	GO:0002283	0.316631	9.08855	164
First	Endothelial	MF	cytoskeletal protein binding	934	295.833	0.000155195	0.0187794	GO:0008092	0.316738	3.80912	165
First	Endothelial	BP	regulation of interleukin-6 production	142	45	3.58086e-05	0.00594953	GO:0032675	0.316901	4.44601	166
First	Endothelial	BP	neutrophil activation	478	151.5	5.5203e-10	8.13184e-07	GO:0042119	0.316946	9.25804	167
First	Endothelial	BP	mononuclear cell migration	85	27	0.000469899	0.0415943	GO:0071674	0.317647	3.328	168
First	Endothelial	BP	positive regulation of cell activation	310	98.5	7.64694e-06	0.0017396	GO:0050867	0.317742	5.11651	169
First	Endothelial	BP	interleukin-6 production	151	48	2.03396e-05	0.00392124	GO:0032635	0.317881	4.69166	170
First	Endothelial	BP	positive regulation of leukocyte activation	297	94.5	1.25308e-05	0.00263947	GO:0002696	0.318182	4.90202	171
First	Endothelial	BP	supramolecular fiber organization	639	204.667	4.69537e-05	0.00768453	GO:0097435	0.320292	4.32833	172
First	Endothelial	MF	kinase activity	721	231.5	0.000175001	0.0206071	GO:0016301	0.321082	3.75696	173
First	Endothelial	BP	positive regulation of locomotion	572	184	7.66725e-08	3.42005e-05	GO:0040017	0.321678	7.11536	174
First	Endothelial	BP	positive regulation of angiogenesis	198	64	6.24311e-05	0.00953185	GO:0045766	0.323232	4.2046	175
First	Endothelial	BP	cytokine secretion	228	74	1.59282e-07	6.03918e-05	GO:0050663	0.324561	6.79783	176
First	Endothelial	BP	leukocyte chemotaxis	212	68.8333	1.31719e-06	0.000365425	GO:0030595	0.324686	5.88035	177
First	Endothelial	BP	maintenance of location	316	102.667	0.000286371	0.0297473	GO:0051235	0.324895	3.54307	178
First	Endothelial	BP	positive regulation of leukocyte mediated immunity	126	41	0.000599166	0.048102	GO:0002705	0.325397	3.22245	179
First	Endothelial	BP	regulation of leukocyte cell-cell adhesion	287	93.5	5.34011e-06	0.00132046	GO:1903037	0.325784	5.27245	180
First	Endothelial	CC	tertiary granule	158	51.5	4.93778e-05	0.00796663	GO:0070820	0.325949	4.30647	181
First	Endothelial	BP	positive regulation of T cell activation	193	63	0.000421119	0.0387856	GO:0050870	0.326425	3.3756	182
First	Endothelial	BP	positive regulation of cellular component movement	559	182.5	6.53757e-08	3.03517e-05	GO:0051272	0.326476	7.18458	183
First	Endothelial	BP	regulation of calcium ion transport	244	79.6667	0.000323087	0.0323739	GO:0051924	0.326503	3.49068	184
First	Endothelial	CC	cytoplasmic region	490	160	0.000540369	0.0450287	GO:0099568	0.326531	3.26731	185
First	Endothelial	BP	cytokine biosynthetic process	116	38	0.000265652	0.0283724	GO:0042089	0.327586	3.57569	186
First	Endothelial	BP	regulation of cytokine secretion	198	65	5.19187e-07	0.000164041	GO:0050707	0.328283	6.28468	187
First	Endothelial	BP	leukocyte migration	419	137.833	6.65831e-10	8.91e-07	GO:0050900	0.328958	9.17664	188
First	Endothelial	MF	phosphotransferase activity, alcohol group as acceptor	662	218	9.27192e-05	0.0125873	GO:0016773	0.329305	4.03283	189
First	Endothelial	BP	negative regulation of cell adhesion	273	90.5	0.000172471	0.0204352	GO:0007162	0.331502	3.76328	190
First	Endothelial	BP	regulation of actin filament-based process	371	123	0.000520416	0.0438479	GO:0032970	0.331536	3.28365	191
First	Endothelial	BP	positive regulation of cell motility	542	180.5	1.09766e-08	6.93631e-06	GO:2000147	0.333026	7.95953	192
First	Endothelial	BP	cytokine metabolic process	117	39	0.000135621	0.0165873	GO:0042107	0.333333	3.86767	193
First	Endothelial	BP	regulation of cell-cell adhesion	385	128.5	6.0401e-07	0.000186909	GO:0022407	0.333766	6.21896	194
First	Endothelial	CC	anchoring junction	541	181	0.000560379	0.0458563	GO:0070161	0.334566	3.25152	195
First	Endothelial	BP	neutrophil migration	107	36	1.69456e-05	0.00339931	GO:1990266	0.336449	4.77094	196
First	Endothelial	MF	protein kinase activity	564	190	9.65345e-05	0.0129945	GO:0004672	0.336879	4.01532	197
First	Endothelial	BP	granulocyte chemotaxis	115	39	7.26716e-06	0.0016707	GO:0071621	0.33913	5.13864	198
First	Endothelial	BP	positive regulation of leukocyte cell-cell adhesion	207	70.5	7.39032e-05	0.0107771	GO:1903039	0.34058	4.13134	199
First	Endothelial	BP	positive regulation of cell migration	520	177.5	3.1685e-09	2.66963e-06	GO:0030335	0.341346	8.49915	200
First	Endothelial	CC	cell-substrate adherens junction	394	134.5	0.000485818	0.0423443	GO:0005924	0.341371	3.31353	201
First	Endothelial	MF	protein serine/threonine kinase activity	415	142	0.000315718	0.0321793	GO:0004674	0.342169	3.5007	202
First	Endothelial	CC	focal adhesion	392	134.5	0.000425014	0.0389763	GO:0005925	0.343112	3.3716	203
First	Endothelial	BP	positive regulation of cytokine secretion	132	45.5	4.73374e-06	0.00118338	GO:0050715	0.344697	5.3248	204
First	Endothelial	BP	leukocyte cell-cell adhesion	319	110	8.95537e-09	6.36643e-06	GO:0007159	0.344828	8.04792	205
First	Endothelial	BP	lymphocyte migration	100	34.5	5.46367e-05	0.00857193	GO:0072676	0.345	4.26252	206
First	Endothelial	BP	regulation of actin cytoskeleton organization	327	113	0.00011242	0.0145309	GO:0032956	0.345566	3.94916	207
First	Endothelial	BP	small GTPase mediated signal transduction	532	184.333	3.14352e-05	0.00548557	GO:0007264	0.346491	4.50258	208
First	Endothelial	CC	actin cytoskeleton	492	170.5	3.19444e-05	0.00550533	GO:0015629	0.346545	4.4956	209
First	Endothelial	CC	extrinsic component of membrane	281	97.6667	0.000367787	0.035909	GO:0019898	0.347568	3.4344	210
First	Endothelial	MF	nucleoside-triphosphatase regulator activity	312	109	0.000535805	0.0448126	GO:0060589	0.349359	3.27099	211
First	Endothelial	MF	GTPase binding	498	174	5.08738e-05	0.0081502	GO:0051020	0.349398	4.29351	212
First	Endothelial	BP	positive regulation of cell-cell adhesion	244	85.5	9.93787e-06	0.00219492	GO:0022409	0.35041	5.00271	213
First	Endothelial	BP	macrophage activation	91	32	0.000615667	0.0485928	GO:0042116	0.351648	3.21065	214
First	Endothelial	BP	regulation of cell adhesion	659	231.833	1.85407e-10	3.83438e-07	GO:0030155	0.351796	9.73187	215
First	Endothelial	BP	regulation of interleukin-1 production	98	34.5	6.53799e-06	0.00153333	GO:0032652	0.352041	5.18456	216
First	Endothelial	MF	small GTPase binding	404	142.5	0.000528571	0.0443707	GO:0031267	0.352723	3.2769	217
First	Endothelial	BP	calcium-mediated signaling	210	74.1667	3.11516e-05	0.00548557	GO:0019722	0.353175	4.50652	218
First	Endothelial	BP	neutrophil chemotaxis	96	34	6.08806e-06	0.00144268	GO:0030593	0.354167	5.21552	219
First	Endothelial	BP	interleukin-1 production	110	39	6.50286e-07	0.000197245	GO:0032612	0.354545	6.1869	220
First	Endothelial	BP	actin filament-based process	725	260.5	3.34955e-09	2.72139e-06	GO:0030029	0.35931	8.47501	221
First	Endothelial	MF	Ras GTPase binding	390	140.5	0.000194504	0.0221239	GO:0017016	0.360256	3.71107	222
First	Endothelial	CC	specific granule	155	56	8.83365e-06	0.00198967	GO:0042581	0.36129	5.05386	223
First	Endothelial	BP	regulation of cell morphogenesis	459	166.833	6.45225e-05	0.00978548	GO:0022604	0.363471	4.19029	224
First	Endothelial	BP	regulation of calcium ion transmembrane transport	144	52.6667	0.000491835	0.0425428	GO:1903169	0.365741	3.30818	225
First	Endothelial	BP	positive regulation of cell adhesion	388	142.833	1.71091e-08	9.62079e-06	GO:0045785	0.368127	7.76677	226
First	Endothelial	BP	regulation of actin filament organization	247	91.5	8.09542e-05	0.0115102	GO:0110053	0.370445	4.09176	227
First	Endothelial	BP	regulation of actin polymerization or depolymerization	168	62.5	0.000602623	0.048102	GO:0008064	0.372024	3.21995	228
First	Endothelial	BP	regulation of interleukin-1 beta production	87	32.5	4.47403e-06	0.00115659	GO:0032651	0.373563	5.3493	229
First	Endothelial	BP	interleukin-1 beta secretion	52	19.5	0.000611032	0.0485928	GO:0050702	0.375	3.21394	230
First	Endothelial	BP	positive regulation of GTPase activity	366	137.5	1.93295e-06	0.000523485	GO:0043547	0.375683	5.71378	231
First	Endothelial	BP	cell-substrate adhesion	338	127.333	1.34749e-05	0.0028123	GO:0031589	0.376726	4.87047	232
First	Endothelial	BP	interleukin-1 beta production	98	37	3.01166e-07	0.000100753	GO:0032611	0.377551	6.52119	233
First	Endothelial	BP	phagocytosis	258	97.5	2.1418e-07	7.73392e-05	GO:0006909	0.377907	6.66922	234
First	Endothelial	BP	actin cytoskeleton organization	635	240	1.66151e-10	3.77978e-07	GO:0030036	0.377953	9.7795	235
First	Endothelial	CC	membrane region	316	119.5	2.2686e-07	8.06382e-05	GO:0098589	0.378165	6.64424	236
First	Endothelial	MF	GTPase regulator activity	272	103	0.000110286	0.0145023	GO:0030695	0.378676	3.95748	237
First	Endothelial	BP	regulation of small GTPase mediated signal transduction	315	119.333	0.000244058	0.026565	GO:0051056	0.378836	3.61251	238
First	Endothelial	CC	cytoplasmic side of membrane	173	65.6667	0.000238921	0.0261308	GO:0098562	0.379576	3.62175	239
First	Endothelial	CC	phagocytic vesicle	121	46	0.000324465	0.0323739	GO:0045335	0.380165	3.48883	240
First	Endothelial	CC	cell cortex	298	113.5	3.44049e-05	0.00581956	GO:0005938	0.380872	4.46338	241
First	Endothelial	BP	regulation of GTPase activity	435	167	2.52368e-08	1.27581e-05	GO:0043087	0.383908	7.59797	242
First	Endothelial	BP	regulation of cell-substrate adhesion	205	78.8333	0.00027244	0.0288266	GO:0010810	0.384553	3.56473	243
First	Endothelial	BP	release of sequestered calcium ion into cytosol	120	46.1667	0.000506684	0.0428496	GO:0051209	0.384722	3.29526	244
First	Endothelial	MF	actin binding	408	157	6.91851e-07	0.000204401	GO:0003779	0.384804	6.15999	245
First	Endothelial	CC	cell leading edge	389	150	5.82906e-06	0.00139585	GO:0031252	0.385604	5.2344	246
First	Endothelial	BP	actin filament polymerization	171	66	0.000111523	0.0145309	GO:0030041	0.385965	3.95263	247
First	Endothelial	BP	positive regulation of interleukin-1 production	57	22	0.000197399	0.0223161	GO:0032732	0.385965	3.70465	248
First	Endothelial	CC	membrane raft	303	117	1.16724e-07	4.91732e-05	GO:0045121	0.386139	6.93284	249
First	Endothelial	CC	membrane microdomain	304	118	8.54698e-08	3.73914e-05	GO:0098857	0.388158	7.06819	250
First	Endothelial	BP	regulation of interleukin-1 beta secretion	45	17.5	0.000601091	0.048102	GO:0050706	0.388889	3.22106	251
First	Endothelial	CC	specific granule membrane	88	34.5	0.000194467	0.0221239	GO:0035579	0.392045	3.71115	252
First	Endothelial	BP	regulation of phosphatidylinositol 3-kinase signaling	122	48	0.000398814	0.0376078	GO:0014066	0.393443	3.39923	253
First	Endothelial	BP	actin filament organization	378	149.5	8.86483e-09	6.36643e-06	GO:0007015	0.395503	8.05233	254
First	Endothelial	BP	actin polymerization or depolymerization	197	78	1.61101e-05	0.0033017	GO:0008154	0.395939	4.7929	255
First	Endothelial	BP	inositol lipid-mediated signaling	178	71	2.91783e-05	0.00534125	GO:0048017	0.398876	4.53494	256
First	Endothelial	BP	phosphatidylinositol-mediated signaling	175	70	2.74095e-05	0.00511097	GO:0048015	0.4	4.5621	257
First	Endothelial	BP	leukocyte adhesion to vascular endothelial cell	40	16	0.000397439	0.0376078	GO:0061756	0.4	3.40073	258
First	Endothelial	MF	guanyl-nucleotide exchange factor activity	206	82.5	0.000271737	0.0288266	GO:0005085	0.400485	3.56585	259
First	Endothelial	BP	regulation of calcium-mediated signaling	94	37.6667	0.000400065	0.0376078	GO:0050848	0.400709	3.39787	260
First	Endothelial	MF	GTPase activator activity	242	97	2.20542e-05	0.00418092	GO:0005096	0.400826	4.65651	261
First	Endothelial	BP	positive regulation of cell-substrate adhesion	119	49.3333	0.000262315	0.0281481	GO:0010811	0.414566	3.58118	262
First	Endothelial	BP	actin filament bundle assembly	148	61.5	0.000182513	0.0211837	GO:0051017	0.415541	3.73871	263
First	Endothelial	CC	lamellipodium	187	78	8.91195e-05	0.0122871	GO:0030027	0.417112	4.05003	264
First	Endothelial	BP	actin filament bundle organization	151	63.5	9.96118e-05	0.0133192	GO:0061572	0.42053	4.00169	265
First	Endothelial	BP	positive regulation of phosphatidylinositol 3-kinase signaling	85	36	0.000614969	0.0485928	GO:0014068	0.423529	3.21115	266
First	Endothelial	MF	Rho GTPase binding	160	68	0.000165497	0.0199201	GO:0017048	0.425	3.78121	267
First	Endothelial	BP	lipopolysaccharide-mediated signaling pathway	57	24.5	0.000183867	0.0212324	GO:0031663	0.429825	3.7355	268
First	Endothelial	BP	positive regulation of interleukin-1 beta production	51	22	3.87291e-05	0.00638441	GO:0032731	0.431373	4.41196	269
First	Endothelial	BP	regulation of myeloid leukocyte mediated immunity	51	22	0.000554326	0.0456084	GO:0002886	0.431373	3.25624	270
First	Endothelial	BP	substrate adhesion-dependent cell spreading	98	42.5	0.000502311	0.0427679	GO:0034446	0.433673	3.29903	271
First	Endothelial	CC	ruffle	167	73	1.08501e-05	0.00235074	GO:0001726	0.437126	4.96457	272
First	Endothelial	BP	integrin-mediated signaling pathway	100	44	0.000246701	0.0267247	GO:0007229	0.44	3.60783	273
First	Endothelial	BP	regulation of interleukin-12 production	52	23	4.73828e-05	0.00769936	GO:0032655	0.442308	4.32438	274
First	Endothelial	BP	interleukin-12 production	54	24	3.08209e-05	0.00548557	GO:0032615	0.444444	4.51115	275
First	Endothelial	MF	protein tyrosine kinase activity	132	60	7.80866e-05	0.0111723	GO:0004713	0.454545	4.10742	276
First	Endothelial	BP	regulation of interleukin-2 production	50	23	0.000323312	0.0323739	GO:0032663	0.46	3.49038	277
First	Endothelial	BP	actin cytoskeleton reorganization	98	45.5	0.000117736	0.014906	GO:0031532	0.464286	3.92909	278
First	Endothelial	BP	interleukin-2 production	58	27	6.9514e-05	0.0102687	GO:0032623	0.465517	4.15793	279
First	Endothelial	BP	B cell receptor signaling pathway	58	27	0.000390937	0.037211	GO:0050853	0.465517	3.40789	280
First	Endothelial	BP	regulation of cell shape	144	68.5	3.79996e-07	0.000123493	GO:0008360	0.475694	6.42022	281
First	Endothelial	BP	Fc receptor mediated stimulatory signaling pathway	81	39	7.61115e-05	0.0109586	GO:0002431	0.481481	4.11855	282
First	Endothelial	BP	Fc-gamma receptor signaling pathway	78	39	1.84719e-05	0.00362257	GO:0038094	0.5	4.73349	283
First	Endothelial	BP	immune response-regulating cell surface receptor signaling pathway involved in phagocytosis	75	38	2.93744e-05	0.00534125	GO:0002433	0.506667	4.53203	284
First	Endothelial	BP	Fc-gamma receptor signaling pathway involved in phagocytosis	75	38	2.93744e-05	0.00534125	GO:0038096	0.506667	4.53203	285
First	Endothelial	BP	interleukin-2 biosynthetic process	21	11	0.000629465	0.0492086	GO:0042094	0.52381	3.20103	286
First	Endothelial	MF	phosphotyrosine residue binding	40	22	0.000443969	0.0402384	GO:0001784	0.55	3.35265	287
First	Endothelial	BP	positive regulation of interleukin-2 production	29	16	0.000277093	0.0291076	GO:0032743	0.551724	3.55737	288
First	Endothelial	BP	positive regulation of superoxide anion generation	19	11	0.000623317	0.048896	GO:0032930	0.578947	3.20529	289
First	Endothelial	BP	leukocyte migration involved in inflammatory response	14	9	0.0001937	0.0221239	GO:0002523	0.642857	3.71287	290
First	Endothelial	BP	positive regulation of sodium ion transmembrane transporter activity	14	11	0.000217153	0.0240976	GO:2000651	0.785714	3.66323	291
First	Hofbauer	CC	cytoplasm	10837	2586.42	0.000332806	0.0276314	GO:0005737	0.238665	3.47781	292
First	Hofbauer	BP	response to stimulus	8475	2028.08	4.92103e-05	0.00592321	GO:0050896	0.239302	4.30794	293
First	Hofbauer	CC	membrane	8576	2066.42	1.73306e-06	0.000361701	GO:0016020	0.240953	5.76119	294
First	Hofbauer	CC	cytoplasmic part	9146	2226.42	1.36308e-05	0.00197508	GO:0044444	0.243431	4.86548	295
First	Hofbauer	BP	signal transduction	5647	1401.67	8.8088e-05	0.00963421	GO:0007165	0.248214	4.05508	296
First	Hofbauer	BP	cell communication	6124	1522	0.000212852	0.0197225	GO:0007154	0.24853	3.67192	297
First	Hofbauer	BP	response to stress	3765	936.25	1.54383e-05	0.00220885	GO:0006950	0.248672	4.8114	298
First	Hofbauer	BP	signaling	6096	1523	0.000116828	0.012022	GO:0023052	0.249836	3.93245	299
First	Hofbauer	BP	defense response	1573	395	7.10533e-08	2.02049e-05	GO:0006952	0.251113	7.14842	300
First	Hofbauer	BP	positive regulation of biological process	5803	1479.83	0.000158644	0.015556	GO:0048518	0.255012	3.79958	301
First	Hofbauer	CC	cytosol	4822	1237.08	0.000206658	0.0193468	GO:0005829	0.25655	3.68475	302
First	Hofbauer	BP	positive regulation of cellular process	5118	1316.5	0.000472993	0.0353951	GO:0048522	0.257229	3.32515	303
First	Hofbauer	BP	regulation of defense response	798	206	0.000117296	0.012022	GO:0031347	0.258145	3.93072	304
First	Hofbauer	BP	response to cytokine	1141	294.833	0.000557549	0.0403939	GO:0034097	0.258399	3.25372	305
First	Hofbauer	BP	innate immune response	858	222.167	1.61558e-05	0.00228279	GO:0045087	0.258936	4.79167	306
First	Hofbauer	CC	plasma membrane	4999	1298.67	6.64874e-08	1.91458e-05	GO:0005886	0.259785	7.17726	307
First	Hofbauer	CC	organelle membrane	2729	711.5	8.34464e-05	0.00921516	GO:0031090	0.260718	4.07859	308
First	Hofbauer	BP	cytokine-mediated signaling pathway	748	195.333	0.000456776	0.0347531	GO:0019221	0.261141	3.3403	309
First	Hofbauer	BP	localization	6282	1640.83	6.05962e-10	3.88556e-07	GO:0051179	0.261196	9.21755	310
First	Hofbauer	BP	establishment of localization	4944	1293.67	5.10292e-09	2.23243e-06	GO:0051234	0.261664	8.29218	311
First	Hofbauer	CC	cell periphery	5112	1339.17	8.02561e-09	3.28507e-06	GO:0071944	0.261965	8.09552	312
First	Hofbauer	BP	transport	4823	1265.17	2.76746e-09	1.28484e-06	GO:0006810	0.262319	8.55792	313
First	Hofbauer	BP	response to external stimulus	2275	597.167	1.66358e-05	0.00233609	GO:0009605	0.262491	4.77896	314
First	Hofbauer	CC	endomembrane system	4181	1107.17	5.75874e-08	1.67956e-05	GO:0012505	0.264809	7.23967	315
First	Hofbauer	CC	vesicle	3654	967.833	1.05636e-08	3.93954e-06	GO:0031982	0.26487	7.97619	316
First	Hofbauer	BP	regulation of response to stimulus	4007	1066.92	2.48001e-06	0.000482203	GO:0048583	0.266263	5.60555	317
First	Hofbauer	BP	regulation of molecular function	2821	755.167	0.000215053	0.0197268	GO:0065009	0.267695	3.66745	318
First	Hofbauer	BP	regulation of response to stress	1509	404.25	2.75634e-05	0.00360367	GO:0080134	0.267893	4.55967	319
First	Hofbauer	BP	regulation of intracellular signal transduction	1856	503	0.00069005	0.0484005	GO:1902531	0.271013	3.16112	320
First	Hofbauer	BP	positive regulation of protein metabolic process	1612	437	0.000562761	0.0406136	GO:0051247	0.271092	3.24968	321
First	Hofbauer	BP	regulation of cytokine production	683	186	0.000169985	0.0164538	GO:0001817	0.272328	3.76959	322
First	Hofbauer	BP	inflammatory response	748	204.667	1.92171e-07	5.02494e-05	GO:0006954	0.273619	6.71631	323
First	Hofbauer	BP	cell surface receptor signaling pathway	2796	768.167	6.08511e-05	0.00706277	GO:0007166	0.274738	4.21573	324
First	Hofbauer	BP	intracellular signal transduction	2794	772.333	8.54336e-06	0.00139822	GO:0035556	0.276426	5.06837	325
First	Hofbauer	CC	plasma membrane part	2658	734.833	0.000209077	0.019493	GO:0044459	0.276461	3.67969	326
First	Hofbauer	BP	regulation of transport	1802	499.333	0.000216912	0.0198174	GO:0051049	0.2771	3.66372	327
First	Hofbauer	BP	positive regulation of intracellular signal transduction	1031	286	0.000463146	0.0351204	GO:1902533	0.277401	3.33428	328
First	Hofbauer	BP	positive regulation of signaling	1770	492.333	0.000237347	0.0214263	GO:0023056	0.278154	3.62462	329
First	Hofbauer	CC	cytoskeleton	2089	582	0.000433793	0.033452	GO:0005856	0.278602	3.36272	330
First	Hofbauer	BP	positive regulation of cell communication	1763	491.333	0.000194438	0.0182779	GO:0010647	0.278692	3.71122	331
First	Hofbauer	BP	regulation of catalytic activity	2206	615.667	1.30471e-05	0.00192667	GO:0050790	0.279087	4.88448	332
First	Hofbauer	BP	positive regulation of response to stimulus	2276	636.167	2.45425e-08	7.64818e-06	GO:0048584	0.279511	7.61008	333
First	Hofbauer	BP	positive regulation of signal transduction	1609	449.833	0.000160561	0.0156296	GO:0009967	0.279573	3.79436	334
First	Hofbauer	BP	regulation of localization	2718	761.5	2.08689e-06	0.000416444	GO:0032879	0.280169	5.6805	335
First	Hofbauer	CC	vesicle lumen	324	91.5	0.000393314	0.0315405	GO:0031983	0.282407	3.40526	336
First	Hofbauer	CC	cytoplasmic vesicle lumen	323	91.5	0.000307813	0.0262263	GO:0060205	0.283282	3.51171	337
First	Hofbauer	BP	cytokine production	751	214	3.28413e-06	0.000627821	GO:0001816	0.284953	5.48358	338
First	Hofbauer	BP	immune system process	2762	788.667	2.09067e-18	1.58535e-14	GO:0002376	0.285542	17.6797	339
First	Hofbauer	BP	regulation of hydrolase activity	1219	348.667	0.000346159	0.0286355	GO:0051336	0.286027	3.46072	340
First	Hofbauer	BP	positive regulation of phosphorylation	1009	290	0.000307269	0.0262263	GO:0042327	0.287413	3.51248	341
First	Hofbauer	BP	regulation of response to external stimulus	813	234	1.28368e-06	0.000280792	GO:0032101	0.287823	5.89154	342
First	Hofbauer	BP	regulation of cellular component organization	2393	689.333	4.97823e-05	0.00596052	GO:0051128	0.288062	4.30292	343
First	Hofbauer	BP	positive regulation of transport	943	272.333	0.000248964	0.022298	GO:0051050	0.288795	3.60386	344
First	Hofbauer	BP	regulation of secretion	777	225.833	0.000323615	0.0272664	GO:0051046	0.290648	3.48997	345
First	Hofbauer	BP	positive regulation of phosphorus metabolic process	1076	313	6.91876e-05	0.00775345	GO:0010562	0.290892	4.15997	346
First	Hofbauer	BP	positive regulation of phosphate metabolic process	1076	313	6.91876e-05	0.00775345	GO:0045937	0.290892	4.15997	347
First	Hofbauer	CC	bounding membrane of organelle	1961	570.667	1.52526e-08	5.25728e-06	GO:0098588	0.291008	7.81666	348
First	Hofbauer	BP	movement of cell or subcellular component	2050	598	1.01079e-05	0.00159684	GO:0006928	0.291707	4.99534	349
First	Hofbauer	BP	lymphocyte mediated immunity	235	69	0.000419988	0.0328025	GO:0002449	0.293617	3.37676	350
First	Hofbauer	BP	cytokine secretion	228	67	0.000361043	0.0297586	GO:0050663	0.29386	3.44244	351
First	Hofbauer	MF	protein-containing complex binding	1088	320.5	0.000383236	0.0310258	GO:0044877	0.294577	3.41653	352
First	Hofbauer	MF	enzyme binding	2112	623.167	5.34403e-06	0.000954928	GO:0019899	0.29506	5.27213	353
First	Hofbauer	CC	secretory granule lumen	306	90.5	0.000112169	0.0117051	GO:0034774	0.295752	3.95013	354
First	Hofbauer	CC	intracellular vesicle	2201	651.333	2.6135e-12	3.12919e-09	GO:0097708	0.295926	11.5828	355
First	Hofbauer	CC	cytoplasmic vesicle	2198	651.333	2.10633e-12	2.81864e-09	GO:0031410	0.29633	11.6765	356
First	Hofbauer	BP	secretion	1585	473.167	3.61691e-11	3.42838e-08	GO:0046903	0.298528	10.4417	357
First	Hofbauer	CC	cytoplasmic vesicle part	1428	426.333	1.96599e-09	9.93876e-07	GO:0044433	0.298553	8.70642	358
First	Hofbauer	BP	immune response	1897	567.667	3.3745e-22	7.67665e-18	GO:0006955	0.299244	21.4718	359
First	Hofbauer	CC	secretory vesicle	950	284.833	1.95272e-09	9.93876e-07	GO:0099503	0.299825	8.70936	360
First	Hofbauer	BP	negative regulation of response to external stimulus	351	105.5	0.000399979	0.0318151	GO:0032102	0.30057	3.39796	361
First	Hofbauer	BP	regulation of immune system process	1472	442.667	2.24049e-14	5.66322e-11	GO:0002682	0.300725	13.6497	362
First	Hofbauer	BP	locomotion	1822	548	3.11516e-08	9.4489e-06	GO:0040011	0.300768	7.50652	363
First	Hofbauer	BP	hematopoietic or lymphoid organ development	893	268.667	6.60488e-06	0.00113829	GO:0048534	0.300859	5.18014	364
First	Hofbauer	BP	immune system development	944	284.667	1.0854e-06	0.000242077	GO:0002520	0.301554	5.96441	365
First	Hofbauer	BP	regulation of cellular component movement	1035	312.167	6.62275e-05	0.00753304	GO:0051270	0.30161	4.17896	366
First	Hofbauer	BP	positive regulation of molecular function	1671	505.333	1.30806e-07	3.5425e-05	GO:0044093	0.302414	6.88337	367
First	Hofbauer	CC	secretory granule	802	242.833	2.4581e-10	1.80385e-07	GO:0030141	0.302785	9.6094	368
First	Hofbauer	BP	regulation of transferase activity	932	282.333	6.83857e-05	0.00773983	GO:0051338	0.302933	4.16503	369
First	Hofbauer	BP	cell motility	1600	485.167	8.53913e-09	3.29249e-06	GO:0048870	0.303229	8.06859	370
First	Hofbauer	BP	localization of cell	1600	485.167	8.53913e-09	3.29249e-06	GO:0051674	0.303229	8.06859	371
First	Hofbauer	BP	positive regulation of immune response	754	229.167	2.32696e-08	7.35221e-06	GO:0050778	0.303935	7.63321	372
First	Hofbauer	BP	negative regulation of immune system process	443	134.833	7.66984e-06	0.00128295	GO:0002683	0.304364	5.11521	373
First	Hofbauer	BP	hemopoiesis	851	259.667	1.77964e-06	0.000368046	GO:0030097	0.305131	5.74967	374
First	Hofbauer	BP	regulation of locomotion	1023	314	4.33133e-06	0.000794625	GO:0040012	0.30694	5.36338	375
First	Hofbauer	BP	secretion by cell	1454	446.667	2.01e-12	2.81864e-09	GO:0032940	0.307199	11.6968	376
First	Hofbauer	BP	autophagy	476	146.5	0.000252453	0.0224338	GO:0006914	0.307773	3.59782	377
First	Hofbauer	BP	process utilizing autophagic mechanism	476	146.5	0.000252453	0.0224338	GO:0061919	0.307773	3.59782	378
First	Hofbauer	BP	regulation of cell motility	952	293.167	7.39259e-06	0.00124573	GO:2000145	0.307948	5.1312	379
First	Hofbauer	BP	immune effector process	1113	343.167	1.22842e-14	3.49316e-11	GO:0002252	0.308326	13.9107	380
First	Hofbauer	BP	regulation of immune effector process	379	117	1.82317e-06	0.000373651	GO:0002697	0.308707	5.73917	381
First	Hofbauer	BP	cytoskeleton organization	1264	390.333	9.28311e-05	0.0100563	GO:0007010	0.308808	4.03231	382
First	Hofbauer	BP	positive regulation of cellular component organization	1205	372.833	1.24958e-05	0.00188256	GO:0051130	0.309405	4.90324	383
First	Hofbauer	BP	myeloid leukocyte migration	197	61	0.000154182	0.0151839	GO:0097529	0.309645	3.81197	384
First	Hofbauer	BP	positive regulation of catalytic activity	1343	416.333	1.68615e-07	4.51274e-05	GO:0043085	0.310002	6.7731	385
First	Hofbauer	BP	cell migration	1450	450.167	2.71571e-09	1.28484e-06	GO:0016477	0.31046	8.56612	386
First	Hofbauer	BP	regulation of hemopoiesis	454	141	3.26784e-05	0.00413001	GO:1903706	0.310573	4.48574	387
First	Hofbauer	BP	regulation of immune response	957	297.667	1.84386e-12	2.81864e-09	GO:0050776	0.311041	11.7343	388
First	Hofbauer	CC	whole membrane	1581	492.333	1.00917e-10	8.19917e-08	GO:0098805	0.311406	9.99603	389
First	Hofbauer	BP	biological adhesion	1363	424.833	1.91047e-06	0.000387388	GO:0022610	0.31169	5.71886	390
First	Hofbauer	BP	positive regulation of immune system process	1020	318.167	1.5376e-12	2.81864e-09	GO:0002684	0.311928	11.8132	391
First	Hofbauer	BP	positive regulation of response to external stimulus	309	96.5	7.86819e-06	0.00129705	GO:0032103	0.312298	5.10413	392
First	Hofbauer	BP	cell-cell adhesion	799	249.833	4.54075e-05	0.00555363	GO:0098609	0.312683	4.34287	393
First	Hofbauer	BP	positive regulation of hydrolase activity	723	226.333	0.000213273	0.0197225	GO:0051345	0.313047	3.67106	394
First	Hofbauer	BP	cell adhesion	1357	424.833	1.04931e-06	0.000236344	GO:0007155	0.313068	5.9791	395
First	Hofbauer	BP	regulation of cell migration	895	281.167	2.25732e-06	0.000446538	GO:0030334	0.314153	5.64641	396
First	Hofbauer	BP	regulation of leukocyte proliferation	210	66	0.000170693	0.0164538	GO:0070663	0.314286	3.76778	397
First	Hofbauer	BP	interleukin-6 production	151	47.5	0.000283703	0.0247278	GO:0032635	0.31457	3.54714	398
First	Hofbauer	BP	regulation of mononuclear cell proliferation	197	62	0.000364482	0.0299335	GO:0032944	0.314721	3.43832	399
First	Hofbauer	BP	regulation of kinase activity	835	262.833	2.16616e-05	0.0028987	GO:0043549	0.31477	4.66431	400
First	Hofbauer	CC	cytoplasmic vesicle membrane	741	233.833	1.75396e-05	0.00244791	GO:0030659	0.315565	4.75598	401
First	Hofbauer	BP	mononuclear cell proliferation	255	80.5	2.42152e-05	0.00320274	GO:0032943	0.315686	4.61591	402
First	Hofbauer	BP	leukocyte mediated immunity	739	233.333	2.01651e-12	2.81864e-09	GO:0002443	0.315742	11.6954	403
First	Hofbauer	BP	regulation of lymphocyte proliferation	196	62	0.000318847	0.0269645	GO:0050670	0.316327	3.49642	404
First	Hofbauer	BP	positive regulation of locomotion	572	181	3.14053e-05	0.00402308	GO:0040017	0.316434	4.503	405
First	Hofbauer	BP	positive regulation of cellular component movement	559	177	5.86358e-05	0.00687581	GO:0051272	0.316637	4.23184	406
First	Hofbauer	BP	positive regulation of organelle organization	602	190.833	8.91333e-05	0.00970188	GO:0010638	0.316999	4.04996	407
First	Hofbauer	BP	adaptive immune response based on somatic recombination of immune receptors built from immunoglobulin superfamily domains	247	78.5	5.38817e-05	0.00638413	GO:0002460	0.317814	4.26856	408
First	Hofbauer	BP	regulation of leukocyte migration	183	58.1667	0.000564153	0.0406136	GO:0002685	0.317851	3.2486	409
First	Hofbauer	BP	positive regulation of immune effector process	206	65.5	0.000472285	0.0353951	GO:0002699	0.317961	3.3258	410
First	Hofbauer	BP	lymphocyte proliferation	253	80.5	1.77791e-05	0.00246621	GO:0046651	0.318182	4.75009	411
First	Hofbauer	BP	B cell activation	226	72	0.000372348	0.0303604	GO:0042113	0.318584	3.42905	412
First	Hofbauer	BP	activation of immune response	584	186.333	7.63587e-08	2.14455e-05	GO:0002253	0.319064	7.11714	413
First	Hofbauer	BP	vesicle-mediated transport	1909	611.5	7.91013e-17	2.57068e-13	GO:0016192	0.320325	16.1018	414
First	Hofbauer	BP	regulation of interleukin-6 production	142	45.5	0.000220465	0.0200614	GO:0032675	0.320423	3.65666	415
First	Hofbauer	CC	vesicle membrane	760	243.833	4.43609e-06	0.000807333	GO:0012506	0.320833	5.353	416
First	Hofbauer	BP	cell chemotaxis	284	91.1667	1.1305e-05	0.00177363	GO:0060326	0.321009	4.94673	417
First	Hofbauer	BP	positive regulation of cell motility	542	174	2.03657e-05	0.00275774	GO:2000147	0.321033	4.6911	418
First	Hofbauer	BP	leukocyte chemotaxis	212	68.6667	1.85887e-05	0.00254743	GO:0030595	0.323899	4.73075	419
First	Hofbauer	BP	regulated exocytosis	755	244.667	4.6805e-10	3.13167e-07	GO:0045055	0.324062	9.32971	420
First	Hofbauer	BP	cell activation	1310	424.833	5.22644e-18	2.97241e-14	GO:0001775	0.3243	17.2818	421
First	Hofbauer	BP	regulation of cellular component biogenesis	906	294.5	1.72849e-06	0.000361701	GO:0044087	0.325055	5.76233	422
First	Hofbauer	CC	lysosome	649	211	1.49812e-08	5.24318e-06	GO:0005764	0.325116	7.82445	423
First	Hofbauer	BP	positive regulation of transferase activity	620	202	6.53093e-05	0.00746593	GO:0051347	0.325806	4.18503	424
First	Hofbauer	CC	lytic vacuole	650	212	1.18315e-08	4.27229e-06	GO:0000323	0.326154	7.92696	425
First	Hofbauer	BP	positive regulation of protein kinase activity	508	166	0.000510822	0.0376074	GO:0045860	0.326772	3.29173	426
First	Hofbauer	BP	regulation of protein complex assembly	446	146.5	8.23555e-05	0.00913905	GO:0043254	0.328475	4.08431	427
First	Hofbauer	BP	exocytosis	857	281.667	2.30304e-11	2.2779e-08	GO:0006887	0.328666	10.6377	428
First	Hofbauer	BP	neutrophil mediated immunity	480	157.833	1.95076e-09	9.93876e-07	GO:0002446	0.328819	8.7098	429
First	Hofbauer	BP	regulation of vesicle-mediated transport	509	167.833	0.00013438	0.013467	GO:0060627	0.329731	3.87167	430
First	Hofbauer	MF	enzyme activator activity	477	157.333	0.000514798	0.0377779	GO:0008047	0.329839	3.28836	431
First	Hofbauer	BP	adaptive immune response	392	129.5	6.11881e-09	2.62635e-06	GO:0002250	0.330357	8.21333	432
First	Hofbauer	CC	late endosome	240	79.3333	0.000477083	0.0354678	GO:0005770	0.330556	3.32141	433
First	Hofbauer	BP	positive regulation of cell migration	520	172	3.6667e-06	0.00068372	GO:0030335	0.330769	5.43572	434
First	Hofbauer	CC	vacuole	740	245	1.61141e-10	1.22193e-07	GO:0005773	0.331081	9.7928	435
First	Hofbauer	BP	leukocyte proliferation	279	92.5	3.2076e-07	8.01865e-05	GO:0070661	0.331541	6.49382	436
First	Hofbauer	BP	neutrophil activation	478	158.833	9.42312e-10	5.22845e-07	GO:0042119	0.332287	9.02581	437
First	Hofbauer	BP	leukocyte activation	1161	385.833	1.46315e-19	1.66426e-15	GO:0045321	0.332328	18.8347	438
First	Hofbauer	BP	myeloid leukocyte mediated immunity	529	175.833	1.33835e-10	1.04986e-07	GO:0002444	0.332388	9.87343	439
First	Hofbauer	BP	taxis	616	205.167	2.36951e-05	0.00315227	GO:0042330	0.333063	4.62534	440
First	Hofbauer	CC	endosome	849	282.833	8.28754e-09	3.29249e-06	GO:0005768	0.333137	8.08157	441
First	Hofbauer	BP	regulation of adaptive immune response based on somatic recombination of immune receptors built from immunoglobulin superfamily domains	138	46	0.00039514	0.0315405	GO:0002822	0.333333	3.40325	442
First	Hofbauer	BP	supramolecular fiber organization	639	213.5	6.24557e-05	0.00721221	GO:0097435	0.334116	4.20443	443
First	Hofbauer	BP	chemotaxis	614	205.167	2.06326e-05	0.00277735	GO:0006935	0.334148	4.68545	444
First	Hofbauer	BP	granulocyte activation	484	161.833	3.02518e-10	2.15062e-07	GO:0036230	0.334366	9.51925	445
First	Hofbauer	BP	neutrophil activation involved in immune response	469	156.833	6.8954e-10	4.23956e-07	GO:0002283	0.334399	9.16144	446
First	Hofbauer	BP	neutrophil degranulation	466	155.833	8.80213e-10	5.00599e-07	GO:0043312	0.334406	9.05541	447
First	Hofbauer	BP	regulation of T cell proliferation	146	49	0.000256129	0.0226719	GO:0042129	0.335616	3.59154	448
First	Hofbauer	BP	immune response-regulating signaling pathway	540	182.833	1.36988e-08	4.8693e-06	GO:0002764	0.33858	7.86332	449
First	Hofbauer	BP	import into cell	813	276.667	1.90266e-08	6.27299e-06	GO:0098657	0.340303	7.72064	450
First	Hofbauer	BP	myeloid leukocyte activation	625	214.333	6.92318e-14	1.57495e-10	GO:0002274	0.342933	13.1597	451
First	Hofbauer	BP	negative regulation of cell activation	189	64.8333	0.000160769	0.0156296	GO:0050866	0.343034	3.7938	452
First	Hofbauer	BP	regulation of cytoskeleton organization	508	174.333	1.34692e-05	0.00196417	GO:0051493	0.343176	4.87066	453
First	Hofbauer	BP	leukocyte degranulation	512	175.833	1.23631e-11	1.2784e-08	GO:0043299	0.343424	10.9079	454
First	Hofbauer	CC	vacuolar part	543	186.5	2.26989e-09	1.12256e-06	GO:0044437	0.343462	8.64399	455
First	Hofbauer	BP	immune response-activating signal transduction	508	174.833	7.71803e-09	3.25143e-06	GO:0002757	0.34416	8.11249	456
First	Hofbauer	BP	positive regulation of kinase activity	548	189	5.88246e-06	0.00103736	GO:0033674	0.344891	5.23044	457
First	Hofbauer	BP	lymphocyte activation	632	218	2.4103e-12	3.04622e-09	GO:0046649	0.344937	11.6179	458
First	Hofbauer	BP	regulation of lymphocyte activation	399	137.833	1.1659e-08	4.27229e-06	GO:0051249	0.345447	7.93334	459
First	Hofbauer	CC	lysosomal membrane	339	117.5	9.832e-06	0.00156411	GO:0005765	0.346608	5.00736	460
First	Hofbauer	BP	endocytosis	693	240.667	8.08669e-09	3.28507e-06	GO:0006897	0.347282	8.09223	461
First	Hofbauer	BP	activation of protein kinase activity	320	111.5	0.000394954	0.0315405	GO:0032147	0.348438	3.40345	462
First	Hofbauer	CC	lytic vacuole membrane	340	118.5	7.20958e-06	0.00123316	GO:0098852	0.348529	5.14209	463
First	Hofbauer	BP	myeloid cell activation involved in immune response	523	182.333	5.40892e-13	1.11861e-09	GO:0002275	0.34863	12.2669	464
First	Hofbauer	BP	leukocyte differentiation	492	171.667	3.0354e-09	1.38104e-06	GO:0002521	0.348916	8.51778	465
First	Hofbauer	BP	positive regulation of cellular component biogenesis	513	179	4.98107e-06	0.00089932	GO:0044089	0.348928	5.30268	466
First	Hofbauer	BP	negative regulation of cell-cell adhesion	171	59.8333	0.000421496	0.0328025	GO:0022408	0.349903	3.37521	467
First	Hofbauer	BP	Ras protein signal transduction	417	146.167	0.000456243	0.0347531	GO:0007265	0.35052	3.3408	468
First	Hofbauer	BP	leukocyte activation involved in immune response	675	236.833	4.46361e-17	1.69238e-13	GO:0002366	0.350864	16.3503	469
First	Hofbauer	BP	negative regulation of immune effector process	114	40	0.000691466	0.0484005	GO:0002698	0.350877	3.16023	470
First	Hofbauer	BP	leukocyte migration	419	147.167	7.5449e-11	6.357e-08	GO:0050900	0.351233	10.1223	471
First	Hofbauer	BP	T cell proliferation	172	60.5	3.26757e-05	0.00413001	GO:0042098	0.351744	4.48578	472
First	Hofbauer	BP	regulation of adaptive immune response	152	53.5	7.36706e-05	0.00821536	GO:0002819	0.351974	4.13271	473
First	Hofbauer	BP	regulation of leukocyte differentiation	261	92	9.25661e-06	0.00150413	GO:1902105	0.35249	5.03355	474
First	Hofbauer	BP	cell activation involved in immune response	679	239.833	1.71336e-17	7.79545e-14	GO:0002263	0.353216	16.7662	475
First	Hofbauer	BP	lymphocyte differentiation	337	119.167	1.76211e-07	4.66119e-05	GO:0030098	0.35361	6.75397	476
First	Hofbauer	CC	tertiary granule	158	56	7.74911e-06	0.00128675	GO:0070820	0.35443	5.11075	477
First	Hofbauer	BP	myeloid leukocyte differentiation	196	69.5	0.000407237	0.0319456	GO:0002573	0.354592	3.39015	478
First	Hofbauer	BP	regulation of lymphocyte differentiation	162	57.5	0.000651076	0.0459351	GO:0045619	0.354938	3.18637	479
First	Hofbauer	BP	negative regulation of leukocyte activation	165	58.8333	3.9054e-05	0.00485131	GO:0002695	0.356566	4.40833	480
First	Hofbauer	BP	regulation of cell activation	524	187.833	1.70777e-12	2.81864e-09	GO:0050865	0.358461	11.7676	481
First	Hofbauer	BP	regulation of leukocyte activation	482	172.833	5.1972e-12	5.91155e-09	GO:0002694	0.358575	11.2842	482
First	Hofbauer	BP	actin filament-based process	725	260.5	3.72786e-07	9.11882e-05	GO:0030029	0.35931	6.42854	483
First	Hofbauer	CC	anchoring junction	541	194.5	0.00010718	0.0112361	GO:0070161	0.359519	3.96989	484
First	Hofbauer	CC	secretory granule membrane	286	102.833	1.99413e-07	5.15506e-05	GO:0030667	0.359557	6.70025	485
First	Hofbauer	BP	immune response-regulating cell surface receptor signaling pathway	380	137.5	5.33746e-08	1.57691e-05	GO:0002768	0.361842	7.27267	486
First	Hofbauer	CC	adherens junction	526	190.5	0.000121373	0.0123817	GO:0005912	0.362167	3.91588	487
First	Hofbauer	CC	vacuolar membrane	396	143.5	1.77002e-08	5.97381e-06	GO:0005774	0.362374	7.75202	488
First	Hofbauer	CC	primary lysosome	149	54	1.19804e-05	0.00184151	GO:0005766	0.362416	4.92153	489
First	Hofbauer	CC	azurophil granule	149	54	1.19804e-05	0.00184151	GO:0042582	0.362416	4.92153	490
First	Hofbauer	CC	late endosome membrane	127	46.3333	0.00061458	0.0438279	GO:0031902	0.364829	3.21142	491
First	Hofbauer	BP	positive regulation of lymphocyte activation	253	92.5	5.96041e-07	0.000138361	GO:0051251	0.365613	6.22472	492
First	Hofbauer	BP	positive regulation of GTPase activity	366	133.833	0.000269999	0.0237151	GO:0043547	0.365665	3.56864	493
First	Hofbauer	BP	negative regulation of cell adhesion	273	99.8333	1.22921e-05	0.00186422	GO:0007162	0.36569	4.91037	494
First	Hofbauer	CC	cell-substrate junction	397	145.5	0.000103833	0.0110378	GO:0030055	0.366499	3.98366	495
First	Hofbauer	BP	regulation of cellular component size	349	128	0.000192494	0.0181703	GO:0032535	0.366762	3.71558	496
First	Hofbauer	BP	protein polymerization	267	98	0.000100861	0.0107723	GO:0051258	0.367041	3.99627	497
First	Hofbauer	BP	immune response-activating cell surface receptor signaling pathway	349	128.5	4.4157e-08	1.32175e-05	GO:0002429	0.368195	7.355	498
First	Hofbauer	CC	cell-substrate adherens junction	394	145.5	6.43286e-05	0.00739097	GO:0005924	0.369289	4.1916	499
First	Hofbauer	BP	T cell differentiation	236	87.1667	5.37302e-06	0.000954928	GO:0030217	0.36935	5.26978	500
First	Hofbauer	BP	lymphocyte activation involved in immune response	169	62.5	1.62835e-06	0.000349465	GO:0002285	0.369822	5.78825	501
First	Hofbauer	CC	focal adhesion	392	145	5.43227e-05	0.00640304	GO:0005925	0.369898	4.26502	502
First	Hofbauer	BP	antigen receptor-mediated signaling pathway	231	85.5	1.31273e-05	0.00192667	GO:0050851	0.37013	4.88182	503
First	Hofbauer	BP	T cell activation	443	164	9.34972e-12	1.01284e-08	GO:0042110	0.370203	11.0292	504
First	Hofbauer	BP	positive regulation of hemopoiesis	174	64.5	0.000144874	0.0143919	GO:1903708	0.37069	3.83901	505
First	Hofbauer	BP	regulation of cell adhesion	659	244.833	4.41819e-11	4.02037e-08	GO:0030155	0.371523	10.3548	506
First	Hofbauer	CC	actin cytoskeleton	492	183	2.35567e-06	0.000461976	GO:0015629	0.371951	5.62789	507
First	Hofbauer	BP	regulation of GTPase activity	435	161.833	3.14786e-05	0.00402308	GO:0043087	0.372031	4.50198	508
First	Hofbauer	BP	positive regulation of leukocyte activation	297	110.5	4.69207e-09	2.09294e-06	GO:0002696	0.372054	8.32864	509
First	Hofbauer	BP	small GTPase mediated signal transduction	532	198.167	1.66565e-06	0.000354129	GO:0007264	0.372494	5.77842	510
First	Hofbauer	CC	membrane region	316	118	1.47824e-05	0.00212838	GO:0098589	0.373418	4.83026	511
First	Hofbauer	BP	regulation of cell-cell adhesion	385	144.333	1.78621e-09	9.67485e-07	GO:0022407	0.374892	8.74807	512
First	Hofbauer	BP	regulation of T cell differentiation	136	51	0.000296488	0.0254521	GO:0045580	0.375	3.52799	513
First	Hofbauer	BP	positive regulation of cell activation	310	116.5	8.36204e-10	4.87764e-07	GO:0050867	0.375806	9.07769	514
First	Hofbauer	BP	regulation of T cell activation	301	113.333	2.38594e-09	1.15484e-06	GO:0050863	0.376523	8.62234	515
First	Hofbauer	BP	actin cytoskeleton organization	635	240.5	2.16504e-08	6.93698e-06	GO:0030036	0.37874	7.66453	516
First	Hofbauer	BP	T cell activation involved in immune response	99	37.5	9.87865e-05	0.0106507	GO:0002286	0.378788	4.0053	517
First	Hofbauer	BP	macrophage activation	91	34.5	0.000422486	0.0328025	GO:0042116	0.379121	3.37419	518
First	Hofbauer	BP	regulation of cell morphogenesis	459	174.5	4.26178e-05	0.00524061	GO:0022604	0.380174	4.37041	519
First	Hofbauer	BP	positive regulation of endocytosis	147	56	0.000292605	0.0253098	GO:0045807	0.380952	3.53372	520
First	Hofbauer	CC	membrane raft	303	115.5	1.29625e-05	0.00192667	GO:0045121	0.381188	4.88731	521
First	Hofbauer	BP	regulation of actin filament-based process	371	141.5	6.38363e-07	0.000146688	GO:0032970	0.381402	6.19493	522
First	Hofbauer	MF	small GTPase binding	404	154.333	4.80235e-05	0.00584218	GO:0031267	0.382013	4.31855	523
First	Hofbauer	CC	cell leading edge	389	148.833	0.000241059	0.0216753	GO:0031252	0.382605	3.61788	524
First	Hofbauer	MF	Ras GTPase binding	390	149.333	5.28434e-05	0.0062939	GO:0017016	0.382906	4.27701	525
First	Hofbauer	CC	membrane microdomain	304	116.5	9.45138e-06	0.00152489	GO:0098857	0.383224	5.0245	526
First	Hofbauer	BP	leukocyte cell-cell adhesion	319	122.333	6.62862e-11	5.79979e-08	GO:0007159	0.38349	10.1786	527
First	Hofbauer	CC	specific granule	155	59.5	6.08789e-06	0.00106533	GO:0042581	0.383871	5.21553	528
First	Hofbauer	BP	regulation of leukocyte cell-cell adhesion	287	110.333	6.14885e-10	3.88556e-07	GO:1903037	0.384437	9.21121	529
First	Hofbauer	MF	GTPase binding	498	191.833	3.3631e-07	8.31601e-05	GO:0051020	0.385207	6.47326	530
First	Hofbauer	MF	GTPase regulator activity	272	105.333	0.000327039	0.0274532	GO:0030695	0.387255	3.4854	531
First	Hofbauer	BP	inositol lipid-mediated signaling	178	69	0.000557524	0.0403939	GO:0048017	0.38764	3.25374	532
First	Hofbauer	BP	phagocytosis	258	100.667	4.61086e-07	0.000111588	GO:0006909	0.390181	6.33622	533
First	Hofbauer	BP	regulation of cell-substrate adhesion	205	80	0.000508341	0.0375463	GO:0010810	0.390244	3.29384	534
First	Hofbauer	BP	positive regulation of leukocyte differentiation	137	53.5	0.000117318	0.012022	GO:1902107	0.390511	3.93063	535
First	Hofbauer	CC	tertiary granule membrane	69	27	0.000704723	0.0491771	GO:0070821	0.391304	3.15198	536
First	Hofbauer	MF	molecular adaptor activity	222	87	0.000113181	0.0117568	GO:0060090	0.391892	3.94623	537
First	Hofbauer	BP	regulation of actin cytoskeleton organization	327	128.5	2.51885e-07	6.43835e-05	GO:0032956	0.392966	6.5988	538
First	Hofbauer	BP	regulation of small GTPase mediated signal transduction	315	124.167	0.000225155	0.0204065	GO:0051056	0.39418	3.64752	539
First	Hofbauer	BP	regulation of supramolecular fiber organization	333	131.5	8.77101e-08	2.43331e-05	GO:1902903	0.394895	7.05695	540
First	Hofbauer	CC	cell cortex	298	118	2.84458e-05	0.00367679	GO:0005938	0.395973	4.54598	541
First	Hofbauer	BP	positive regulation of cell adhesion	388	154	4.49615e-10	3.09948e-07	GO:0045785	0.396907	9.34716	542
First	Hofbauer	BP	positive regulation of cell-cell adhesion	244	97.5	2.15211e-08	6.93698e-06	GO:0022409	0.39959	7.66714	543
First	Hofbauer	BP	positive regulation of cytoskeleton organization	218	87.3333	1.10797e-06	0.00024471	GO:0051495	0.400612	5.95547	544
First	Hofbauer	MF	GTPase activator activity	242	97.3333	0.00018008	0.0171407	GO:0005096	0.402204	3.74453	545
First	Hofbauer	MF	actin binding	408	164.5	4.97544e-07	0.000116687	GO:0003779	0.403186	6.30317	546
First	Hofbauer	CC	specific granule membrane	88	35.5	0.000293795	0.0253165	GO:0035579	0.403409	3.53195	547
First	Hofbauer	BP	positive regulation of T cell activation	193	78	1.08656e-07	2.97809e-05	GO:0050870	0.404145	6.96395	548
First	Hofbauer	BP	actin filament organization	378	153	2.9409e-08	9.04088e-06	GO:0007015	0.404762	7.53152	549
First	Hofbauer	BP	regulation of protein polymerization	207	84	6.32339e-06	0.0010981	GO:0032271	0.405797	5.19905	550
First	Hofbauer	BP	ceramide metabolic process	91	37	0.000151441	0.0149789	GO:0006672	0.406593	3.81976	551
First	Hofbauer	BP	actin polymerization or depolymerization	197	80.5	3.42299e-05	0.00430219	GO:0008154	0.408629	4.46559	552
First	Hofbauer	BP	T cell differentiation involved in immune response	66	27	0.000537606	0.0391987	GO:0002292	0.409091	3.26954	553
First	Hofbauer	BP	positive regulation of protein polymerization	128	52.5	0.000290597	0.0252321	GO:0032273	0.410156	3.53671	554
First	Hofbauer	BP	positive regulation of leukocyte cell-cell adhesion	207	85.5	9.13642e-09	3.46407e-06	GO:1903039	0.413043	8.03922	555
First	Hofbauer	MF	actin filament binding	190	78.5	0.000432414	0.033452	GO:0051015	0.413158	3.3641	556
First	Hofbauer	MF	protein binding, bridging	162	67	4.86688e-05	0.00588919	GO:0030674	0.41358	4.31275	557
First	Hofbauer	BP	regulation of actin filament length	169	70	2.79361e-05	0.00363153	GO:0030832	0.414201	4.55383	558
First	Hofbauer	BP	Fc receptor signaling pathway	171	71	9.56652e-06	0.0015326	GO:0038093	0.415205	5.01925	559
First	Hofbauer	BP	actin filament polymerization	171	71	2.51911e-05	0.00331256	GO:0030041	0.415205	4.59875	560
First	Hofbauer	BP	regulation of actin polymerization or depolymerization	168	70	2.01991e-05	0.00275155	GO:0008064	0.416667	4.69467	561
First	Hofbauer	BP	alpha-beta T cell differentiation	97	40.6667	0.000384961	0.0310549	GO:0046632	0.419244	3.41458	562
First	Hofbauer	CC	lamellipodium	187	78.5	0.000476413	0.0354678	GO:0030027	0.419786	3.32202	563
First	Hofbauer	BP	lysosome localization	69	29	0.000471256	0.0353951	GO:0032418	0.42029	3.32674	564
First	Hofbauer	BP	CD4-positive, alpha-beta T cell differentiation	71	30	0.000444549	0.0341657	GO:0043367	0.422535	3.35208	565
First	Hofbauer	BP	positive regulation of supramolecular fiber organization	197	83.5	8.79879e-07	0.000200164	GO:1902905	0.423858	6.05558	566
First	Hofbauer	BP	regulation of actin filament polymerization	152	65	1.22399e-05	0.00186422	GO:0030833	0.427632	4.91222	567
First	Hofbauer	BP	positive regulation of actin filament polymerization	94	40.5	0.000535293	0.0391556	GO:0030838	0.430851	3.27141	568
First	Hofbauer	BP	actin filament bundle organization	151	65.5	0.000128988	0.0130997	GO:0061572	0.433775	3.88945	569
First	Hofbauer	BP	regulation of actin filament organization	247	107.5	1.78566e-08	5.97381e-06	GO:0110053	0.435223	7.7482	570
First	Hofbauer	BP	alpha-beta T cell activation	129	56.5	1.56162e-06	0.000338336	GO:0046631	0.437984	5.80643	571
First	Hofbauer	MF	guanyl-nucleotide exchange factor activity	206	90.5	1.61031e-05	0.00228279	GO:0005085	0.43932	4.79309	572
First	Hofbauer	BP	alpha-beta T cell activation involved in immune response	59	26	0.000407216	0.0319456	GO:0002287	0.440678	3.39017	573
First	Hofbauer	BP	alpha-beta T cell differentiation involved in immune response	59	26	0.000407216	0.0319456	GO:0002293	0.440678	3.39017	574
First	Hofbauer	BP	lymphocyte costimulation	52	23	0.000616645	0.0438377	GO:0031294	0.442308	3.20996	575
First	Hofbauer	BP	actin filament bundle assembly	148	65.5	5.96993e-05	0.00696461	GO:0051017	0.442568	4.22403	576
First	Hofbauer	BP	CD4-positive, alpha-beta T cell differentiation involved in immune response	58	26	0.000316629	0.0268768	GO:0002294	0.448276	3.49945	577
First	Hofbauer	BP	T cell costimulation	51	23	0.000470428	0.0353951	GO:0031295	0.45098	3.32751	578
First	Hofbauer	BP	CD4-positive, alpha-beta T cell activation	86	39	7.36288e-06	0.00124573	GO:0035710	0.453488	5.13295	579
First	Hofbauer	BP	contractile actin filament bundle assembly	95	43.5	0.000330251	0.0275197	GO:0030038	0.457895	3.48116	580
First	Hofbauer	BP	stress fiber assembly	95	43.5	0.000330251	0.0275197	GO:0043149	0.457895	3.48116	581
First	Hofbauer	MF	Ras guanyl-nucleotide exchange factor activity	132	60.5	0.000608417	0.0435248	GO:0005088	0.458333	3.2158	582
First	Hofbauer	BP	regulation of actomyosin structure organization	92	42.5	8.40924e-05	0.00924163	GO:0110020	0.461957	4.07524	583
First	Hofbauer	BP	regulation of stress fiber assembly	81	37.5	0.000371032	0.0303604	GO:0051492	0.462963	3.43059	584
First	Hofbauer	BP	regulation of alpha-beta T cell activation	86	39.8333	1.27221e-05	0.00190404	GO:0046634	0.463178	4.89544	585
First	Hofbauer	BP	mast cell activation	56	26	0.000100331	0.0107662	GO:0045576	0.464286	3.99856	586
First	Hofbauer	BP	T-helper cell differentiation	56	26	0.000214711	0.0197268	GO:0042093	0.464286	3.66815	587
First	Hofbauer	BP	positive regulation of alpha-beta T cell activation	58	27	0.000264709	0.0233406	GO:0046635	0.465517	3.57723	588
First	Hofbauer	BP	mast cell activation involved in immune response	45	21	0.000451386	0.0345743	GO:0002279	0.466667	3.34545	589
First	Hofbauer	BP	regulation of CD4-positive, alpha-beta T cell differentiation	45	21	0.00048476	0.0359212	GO:0043370	0.466667	3.31447	590
First	Hofbauer	BP	regulation of actin filament bundle assembly	93	43.5	0.000105507	0.0111119	GO:0032231	0.467742	3.97672	591
First	Hofbauer	BP	actin cytoskeleton reorganization	98	46	0.000183637	0.0174065	GO:0031532	0.469388	3.73604	592
First	Hofbauer	BP	regulation of cell shape	144	68	2.66319e-06	0.000513431	GO:0008360	0.472222	5.5746	593
First	Hofbauer	MF	immunoglobulin binding	19	9	0.00040436	0.0319456	GO:0019865	0.473684	3.39323	594
First	Hofbauer	BP	regulation of antigen receptor-mediated signaling pathway	63	30	1.85392e-05	0.00254743	GO:0050854	0.47619	4.73191	595
First	Hofbauer	BP	regulation of phospholipid metabolic process	84	40.5	3.53762e-05	0.00442183	GO:1903725	0.482143	4.45129	596
First	Hofbauer	BP	regulation of leukocyte degranulation	43	21	0.000623813	0.0442091	GO:0043300	0.488372	3.20495	597
First	Hofbauer	BP	positive regulation of actin filament bundle assembly	60	30	0.000131764	0.0133222	GO:0032233	0.5	3.8802	598
First	Hofbauer	BP	adherens junction assembly	88	44.5	0.000592468	0.0425175	GO:0034333	0.505682	3.22734	599
First	Hofbauer	BP	positive regulation of CD4-positive, alpha-beta T cell activation	33	17	0.000174649	0.0166936	GO:2000516	0.515152	3.75783	600
First	Hofbauer	BP	regulation of lipid kinase activity	63	32.5	0.000104837	0.0110927	GO:0043550	0.515873	3.97949	601
First	Hofbauer	BP	regulation of CD4-positive, alpha-beta T cell activation	56	29	3.41775e-06	0.000642566	GO:2000514	0.517857	5.46626	602
First	Hofbauer	BP	regulation of phosphatidylinositol 3-kinase activity	54	28.5	0.000172008	0.0165106	GO:0043551	0.527778	3.76445	603
First	Hofbauer	BP	positive regulation of stress fiber assembly	51	27	0.000133542	0.0134423	GO:0051496	0.529412	3.87438	604
First	Hofbauer	MF	signaling adaptor activity	74	40	1.15011e-05	0.00179204	GO:0035591	0.540541	4.93926	605
First	Hofbauer	BP	Fc receptor mediated stimulatory signaling pathway	81	44	1.92425e-06	0.000387388	GO:0002431	0.54321	5.71574	606
First	Hofbauer	BP	Fc-gamma receptor signaling pathway	78	44	3.17606e-07	8.01865e-05	GO:0038094	0.564103	6.49811	607
First	Hofbauer	CC	immunological synapse	36	20.5	0.000143415	0.0143094	GO:0001772	0.569444	3.84341	608
First	Hofbauer	BP	immune response-regulating cell surface receptor signaling pathway involved in phagocytosis	75	43	4.78589e-07	0.000113411	GO:0002433	0.573333	6.32004	609
First	Hofbauer	BP	Fc-gamma receptor signaling pathway involved in phagocytosis	75	43	4.78589e-07	0.000113411	GO:0038096	0.573333	6.32004	610
First	Hofbauer	BP	T-helper 1 cell differentiation	19	11	0.000652206	0.0459351	GO:0045063	0.578947	3.18562	611
First	Hofbauer	BP	positive regulation of lipid kinase activity	36	21	0.000283229	0.0247278	GO:0090218	0.583333	3.54786	612
First	Hofbauer	MF	SH3/SH2 adaptor activity	46	27	3.92387e-05	0.00485131	GO:0005070	0.586957	4.40629	613
First	Hofbauer	BP	positive regulation of phosphatidylinositol 3-kinase activity	32	19	0.000378825	0.0307782	GO:0043552	0.59375	3.42156	614
First	Hofbauer	BP	positive regulation of phospholipid metabolic process	46	28	3.38133e-06	0.000641016	GO:1903727	0.608696	5.47091	615
First	Hofbauer	BP	B cell receptor signaling pathway	58	38	7.75479e-10	4.64246e-07	GO:0050853	0.655172	9.11043	616
First	Hofbauer	BP	regulation of B cell receptor signaling pathway	28	19	3.71761e-06	0.000687576	GO:0050855	0.678571	5.42974	617
First	Stromal	CC	cytoplasm	10837	2604.08	4.75446e-07	0.00063623	GO:0005737	0.240296	6.3229	618
First	Stromal	BP	immune response	1897	459.167	8.77408e-05	0.0295098	GO:0006955	0.242049	4.0568	619
First	Stromal	CC	cytoplasmic part	9146	2225.5	5.67109e-07	0.000645058	GO:0044444	0.24333	6.24633	620
First	Stromal	BP	regulation of cellular protein metabolic process	2535	653.667	0.000132241	0.0390695	GO:0032268	0.257857	3.87863	621
First	Stromal	BP	phosphate-containing compound metabolic process	3147	831.583	5.49013e-05	0.0219114	GO:0006796	0.264246	4.26042	622
First	Stromal	BP	phosphorus metabolic process	3172	838.583	4.83306e-05	0.0196334	GO:0006793	0.264371	4.31578	623
First	Stromal	CC	cytosol	4822	1299.67	5.30466e-11	6.03378e-07	GO:0005829	0.269529	10.2753	624
First	Stromal	BP	regulation of signal transduction	3004	815.417	8.8209e-05	0.0295098	GO:0009966	0.271444	4.05449	625
First	Stromal	BP	intracellular signal transduction	2794	768.5	8.68464e-06	0.00506582	GO:0035556	0.275054	5.06125	626
First	Stromal	BP	regulation of catalytic activity	2206	612.667	1.19366e-05	0.00646538	GO:0050790	0.277727	4.92312	627
First	Stromal	CC	cytoskeleton	2089	586.583	0.000114039	0.0350578	GO:0005856	0.280796	3.94295	628
First	Stromal	BP	negative regulation of signaling	1360	383.333	0.000150075	0.0432158	GO:0023057	0.281863	3.82369	629
First	Stromal	BP	regulation of intracellular signal transduction	1856	524.5	2.25724e-06	0.00177069	GO:1902531	0.282597	5.64642	630
First	Stromal	BP	negative regulation of cell communication	1356	383.333	0.000118846	0.0360483	GO:0010648	0.282694	3.92502	631
First	Stromal	BP	negative regulation of signal transduction	1253	358.333	5.97129e-05	0.0234208	GO:0009968	0.28598	4.22393	632
First	Stromal	BP	cellular response to oxygen-containing compound	1092	313.583	0.000148248	0.0432158	GO:1901701	0.287164	3.82901	633
First	Stromal	BP	regulation of hydrolase activity	1219	352	7.79526e-05	0.0281483	GO:0051336	0.288761	4.10817	634
First	Stromal	BP	cell migration	1450	418.833	7.40566e-05	0.0276183	GO:0016477	0.288851	4.13044	635
First	Stromal	BP	vesicle-mediated transport	1909	552.333	4.25662e-08	0.000138334	GO:0016192	0.289331	7.37094	636
First	Stromal	BP	positive regulation of molecular function	1671	492.667	9.50461e-06	0.00540551	GO:0044093	0.294833	5.02207	637
First	Stromal	BP	regulation of locomotion	1023	303.333	9.63777e-05	0.0313214	GO:0040012	0.296514	4.01602	638
First	Stromal	BP	regulation of cellular component movement	1035	310.333	8.23838e-05	0.0288652	GO:0051270	0.299839	4.08416	639
First	Stromal	BP	regulation of cell motility	952	287.333	3.6571e-05	0.0159991	GO:2000145	0.301821	4.43686	640
First	Stromal	BP	positive regulation of catalytic activity	1343	410.167	1.41966e-06	0.00124215	GO:0043085	0.305411	5.84781	641
First	Stromal	MF	enzyme binding	2112	647.333	1.33236e-09	7.57744e-06	GO:0019899	0.306503	8.87538	642
First	Stromal	BP	regulation of cell migration	895	274.333	2.08863e-05	0.010451	GO:0030334	0.306518	4.68014	643
First	Stromal	BP	positive regulation of cell migration	520	164	0.000101356	0.0320243	GO:0030335	0.315385	3.99415	644
First	Stromal	BP	cytoskeleton organization	1264	403.5	1.03837e-06	0.000984249	GO:0007010	0.319225	5.98365	645
First	Stromal	BP	regulation of cell adhesion	659	213	8.24755e-05	0.0288652	GO:0030155	0.323217	4.08367	646
First	Stromal	BP	cellular response to nitrogen compound	619	201.583	4.20178e-05	0.0180352	GO:1901699	0.32566	4.37657	647
First	Stromal	BP	positive regulation of hydrolase activity	723	238	1.22058e-06	0.00111068	GO:0051345	0.329184	5.91343	648
First	Stromal	BP	supramolecular fiber organization	639	211.5	0.000104797	0.032658	GO:0097435	0.330986	3.97965	649
First	Stromal	BP	cellular response to organonitrogen compound	561	193.583	1.73882e-06	0.00146505	GO:0071417	0.345068	5.75975	650
First	Stromal	MF	cytoskeletal protein binding	934	323	5.07999e-07	0.000642026	GO:0008092	0.345824	6.29414	651
First	Stromal	BP	response to insulin	263	92.5833	6.1176e-05	0.023588	GO:0032868	0.352028	4.21342	652
First	Stromal	MF	enzyme activator activity	477	168.333	3.53352e-06	0.00259126	GO:0008047	0.3529	5.45179	653
First	Stromal	BP	regulation of actin cytoskeleton organization	327	117	0.000158884	0.0451808	GO:0032956	0.357798	3.79892	654
First	Stromal	BP	cellular response to insulin stimulus	211	78	9.84083e-05	0.0315309	GO:0032869	0.369668	4.00697	655
First	Stromal	CC	actin cytoskeleton	492	182	3.64502e-06	0.00259126	GO:0015629	0.369919	5.4383	656
First	Stromal	CC	cell-substrate adherens junction	394	147	2.37273e-05	0.0114845	GO:0005924	0.373096	4.62475	657
First	Stromal	CC	focal adhesion	392	147	1.98821e-05	0.0102795	GO:0005925	0.375	4.70154	658
First	Stromal	CC	anchoring junction	541	203	2.03532e-06	0.00165362	GO:0070161	0.375231	5.69137	659
First	Stromal	CC	cell-substrate junction	397	149	1.54013e-05	0.00814802	GO:0030055	0.375315	4.81244	660
First	Stromal	BP	regulation of supramolecular fiber organization	333	125.5	4.57646e-06	0.00292913	GO:1902903	0.376877	5.33947	661
First	Stromal	CC	adherens junction	526	200	7.25938e-07	0.000750652	GO:0005912	0.380228	6.1391	662
First	Stromal	BP	protein polymerization	267	102	8.58277e-06	0.00506582	GO:0051258	0.382022	5.06637	663
First	Stromal	MF	actin binding	408	157.5	3.30546e-05	0.0147443	GO:0003779	0.386029	4.48077	664
First	Stromal	BP	Ras protein signal transduction	417	161	1.78128e-07	0.000368385	GO:0007265	0.386091	6.74927	665
First	Stromal	BP	actin filament-based process	725	280	3.93111e-11	6.03378e-07	GO:0030029	0.386207	10.4055	666
First	Stromal	BP	regulation of protein polymerization	207	80	7.76778e-05	0.0281483	GO:0032271	0.386473	4.1097	667
First	Stromal	BP	regulation of GTPase activity	435	168.5	4.41391e-07	0.000630918	GO:0043087	0.387356	6.35518	668
First	Stromal	MF	GTPase binding	498	194	7.33298e-08	0.000172815	GO:0051020	0.389558	7.13472	669
First	Stromal	MF	molecular adaptor activity	222	86.5	0.000181157	0.0496523	GO:0060090	0.38964	3.74194	670
First	Stromal	BP	positive regulation of supramolecular fiber organization	197	77	4.61523e-05	0.0190894	GO:1902905	0.390863	4.33581	671
First	Stromal	BP	regulation of actin filament organization	247	97	2.11327e-05	0.010451	GO:0110053	0.392713	4.67505	672
First	Stromal	BP	small GTPase mediated signal transduction	532	209	4.88843e-09	2.22414e-05	GO:0007264	0.392857	8.31083	673
First	Stromal	BP	actin cytoskeleton organization	635	250	1.37602e-10	1.04343e-06	GO:0030036	0.393701	9.86138	674
First	Stromal	BP	actin filament organization	378	149	2.44482e-07	0.000463477	GO:0007015	0.39418	6.61175	675
First	Stromal	BP	positive regulation of GTPase activity	366	145	3.13768e-07	0.000549069	GO:0043547	0.396175	6.50339	676
First	Stromal	MF	small GTPase binding	404	161	6.95005e-07	0.000750652	GO:0031267	0.398515	6.15801	677
First	Stromal	BP	regulation of cell-substrate adhesion	205	82	0.000161442	0.0453413	GO:0010810	0.4	3.79198	678
First	Stromal	MF	Ras GTPase binding	390	157	4.43742e-07	0.000630918	GO:0017016	0.402564	6.35287	679
First	Stromal	BP	regulation of actin filament polymerization	152	62	9.34228e-05	0.0308011	GO:0030833	0.407895	4.02955	680
First	Stromal	BP	actin polymerization or depolymerization	197	80.5	3.10983e-05	0.0144379	GO:0008154	0.408629	4.50726	681
First	Stromal	MF	nucleoside-triphosphatase regulator activity	312	129.5	7.59662e-08	0.000172815	GO:0060589	0.415064	7.11938	682
First	Stromal	BP	actin filament polymerization	171	72.5	1.12065e-05	0.00621798	GO:0030041	0.423977	4.95053	683
First	Stromal	MF	GTPase regulator activity	272	116.5	3.50632e-07	0.000569752	GO:0030695	0.428309	6.45515	684
First	Stromal	CC	lamellipodium	187	81	8.60382e-05	0.0295098	GO:0030027	0.433155	4.06531	685
First	Stromal	MF	GTPase activator activity	242	105	8.29302e-07	0.000820252	GO:0005096	0.433884	6.08129	686
First	Stromal	MF	Rho GTPase binding	160	71	0.000123747	0.0370409	GO:0017048	0.44375	3.90747	687
First	Stromal	BP	actin filament bundle organization	151	67.5	3.19022e-05	0.0145149	GO:0061572	0.44702	4.49618	688
First	Stromal	BP	regulation of small GTPase mediated signal transduction	315	141.5	8.96919e-09	3.40067e-05	GO:0051056	0.449206	8.04725	689
First	Stromal	BP	actin filament bundle assembly	148	66.5	2.85325e-05	0.0135226	GO:0051017	0.449324	4.54466	690
First	Stromal	BP	regulation of Ras protein signal transduction	224	102	5.43282e-07	0.000645058	GO:0046578	0.455357	6.26497	691
First	Stromal	BP	regulation of cell-matrix adhesion	114	53	6.37111e-05	0.0241561	GO:0001952	0.464912	4.19578	692
First	Stromal	MF	guanyl-nucleotide exchange factor activity	206	97.5	6.66039e-08	0.000172815	GO:0005085	0.473301	7.1765	693
First	Stromal	MF	Ras guanyl-nucleotide exchange factor activity	132	67.5	3.94588e-06	0.00272015	GO:0005088	0.511364	5.40386	694
First	Stromal	BP	Fc receptor mediated stimulatory signaling pathway	81	43	5.49326e-06	0.00337746	GO:0002431	0.530864	5.26017	695
First	Stromal	BP	Fc-gamma receptor signaling pathway	78	42	2.9929e-06	0.00226951	GO:0038094	0.538462	5.52391	696
First	Stromal	BP	immune response-regulating cell surface receptor signaling pathway involved in phagocytosis	75	41	4.63531e-06	0.00292913	GO:0002433	0.546667	5.33392	697
First	Stromal	BP	Fc-gamma receptor signaling pathway involved in phagocytosis	75	41	4.63531e-06	0.00292913	GO:0038096	0.546667	5.33392	698
First	Stromal	MF	Rho guanyl-nucleotide exchange factor activity	74	42.5	4.29851e-05	0.0181087	GO:0005089	0.574324	4.36668	699
First	Stromal	BP	Rac protein signal transduction	33	20	0.000170332	0.0472548	GO:0016601	0.606061	3.7687	700
Term	Endothelial	CC	nuclear lumen	4243	957.333	4.86103e-05	0.0425322	GO:0031981	0.225627	4.31327	701
Term	Endothelial	BP	cellular protein metabolic process	4949	1164.42	4.89786e-06	0.00857088	GO:0044267	0.235283	5.30999	702
Term	Endothelial	BP	macromolecule modification	4103	1017.75	3.75234e-07	0.00121946	GO:0043412	0.24805	6.4257	703
Term	Endothelial	BP	cellular protein modification process	3903	976.75	1.68742e-06	0.00383872	GO:0006464	0.250256	5.77278	704
Term	Endothelial	BP	protein modification process	3903	976.75	1.68742e-06	0.00383872	GO:0036211	0.250256	5.77278	705
Term	Endothelial	CC	nucleoplasm	3311	836.667	1.82828e-07	0.000730758	GO:0005654	0.252693	6.73796	706
Term	Endothelial	CC	cytosol	4822	1222.33	2.66192e-10	6.05559e-06	GO:0005829	0.253491	9.57481	707
Term	Endothelial	BP	cellular response to stress	1962	498.833	2.29354e-05	0.0289865	GO:0033554	0.254247	4.63949	708
Term	Endothelial	BP	regulation of intracellular signal transduction	1856	491.75	1.42669e-05	0.0216372	GO:1902531	0.264952	4.84567	709
Term	Endothelial	BP	intracellular signal transduction	2794	742.75	7.53919e-08	0.000571697	GO:0035556	0.265838	7.12268	710
Term	Endothelial	MF	catalytic activity, acting on a protein	2029	544.833	5.15976e-05	0.0434738	GO:0140096	0.268523	4.28737	711
Term	Endothelial	BP	tube development	1068	306.167	2.90437e-05	0.0330357	GO:0035295	0.286673	4.53695	712
Term	Endothelial	MF	enzyme binding	2112	610.583	6.34412e-09	7.21611e-05	GO:0019899	0.289102	8.19763	713
Term	Endothelial	BP	tube morphogenesis	886	260.917	2.08065e-05	0.0278428	GO:0035239	0.294488	4.6818	714
Term	Endothelial	BP	cardiovascular system development	769	226.917	1.65019e-05	0.0234626	GO:0072358	0.29508	4.78247	715
Term	Endothelial	BP	vasculature development	761	224.917	1.20231e-05	0.0195367	GO:0001944	0.295554	4.91998	716
Term	Endothelial	BP	small GTPase mediated signal transduction	532	188	3.61025e-06	0.00746632	GO:0007264	0.353383	5.44246	717
Term	Endothelial	CC	cell-substrate junction	397	141.5	3.32142e-05	0.0337041	GO:0030055	0.356423	4.47868	718
Term	Endothelial	CC	cell-substrate adherens junction	394	140.5	3.22041e-05	0.0337041	GO:0005924	0.356599	4.49209	719
Term	Endothelial	BP	positive regulation of GTPase activity	366	131	4.63109e-05	0.0421411	GO:0043547	0.357923	4.33432	720
Term	Endothelial	CC	focal adhesion	392	140.5	2.74108e-05	0.0328194	GO:0005925	0.358418	4.56208	721
Term	Endothelial	CC	anchoring junction	541	198	1.92736e-07	0.000730758	GO:0070161	0.365989	6.71504	722
Term	Endothelial	BP	regulation of GTPase activity	435	160	7.19851e-07	0.00204699	GO:0043087	0.367816	6.14276	723
Term	Endothelial	CC	adherens junction	526	195	1.5019e-07	0.000730758	GO:0005912	0.370722	6.82336	724
Term	Endothelial	BP	endothelium development	128	51	4.41943e-05	0.0418907	GO:0003158	0.398438	4.35463	725
Term	Endothelial	CC	ruffle	167	74.5	4.86382e-06	0.00857088	GO:0001726	0.446108	5.31302	726
Term	Endothelial	BP	protein K48-linked ubiquitination	55	27.8333	3.4076e-05	0.0337041	GO:0070936	0.506061	4.46755	727
Term	Hofbauer	BP	response to stimulus	8475	1962.67	9.99656e-06	0.00241927	GO:0050896	0.231583	5.00015	728
Term	Hofbauer	BP	defense response	1573	372.333	6.71902e-06	0.00177734	GO:0006952	0.236703	5.17269	729
Term	Hofbauer	BP	cellular response to stimulus	7030	1677.17	1.32925e-07	7.82026e-05	GO:0051716	0.238573	6.87639	730
Term	Hofbauer	BP	response to stress	3765	906.833	9.30883e-06	0.00230181	GO:0006950	0.240859	5.03111	731
Term	Hofbauer	BP	response to bacterium	585	141.5	0.000490053	0.0482607	GO:0009617	0.24188	3.30976	732
Term	Hofbauer	BP	signal transduction	5647	1373.83	4.80211e-07	0.000206119	GO:0007165	0.243286	6.31857	733
Term	Hofbauer	BP	signaling	6096	1483.33	5.07493e-06	0.00140792	GO:0023052	0.243329	5.29457	734
Term	Hofbauer	BP	cell communication	6124	1494.83	8.8184e-07	0.000345879	GO:0007154	0.244094	6.05461	735
Term	Hofbauer	BP	cellular response to chemical stimulus	3113	769.833	0.000332013	0.0354599	GO:0070887	0.247296	3.47885	736
Term	Hofbauer	BP	response to external stimulus	2275	570.5	5.73303e-05	0.00893293	GO:0009605	0.250769	4.24162	737
Term	Hofbauer	CC	secretory granule	802	202	0.000496422	0.0483785	GO:0030141	0.25187	3.30415	738
Term	Hofbauer	BP	cellular response to organic substance	2571	661.167	3.61802e-05	0.00628293	GO:0071310	0.257163	4.44153	739
Term	Hofbauer	BP	regulation of inflammatory response	400	103.5	0.000346409	0.0366534	GO:0050727	0.25875	3.46041	740
Term	Hofbauer	BP	immune system process	2762	715.5	5.42025e-11	2.4661e-07	GO:0002376	0.259051	10.266	741
Term	Hofbauer	BP	regulation of response to stress	1509	391.833	2.3049e-05	0.00457598	GO:0080134	0.259664	4.63735	742
Term	Hofbauer	CC	intracellular vesicle	2201	575	4.86418e-05	0.00796081	GO:0097708	0.261245	4.31299	743
Term	Hofbauer	CC	cytoplasmic vesicle	2198	575	4.24556e-05	0.00715425	GO:0031410	0.261601	4.37206	744
Term	Hofbauer	BP	regulation of defense response	798	209	3.24208e-06	0.00103879	GO:0031347	0.261905	5.48918	745
Term	Hofbauer	BP	regulation of response to stimulus	4007	1051	3.02379e-09	4.91345e-06	GO:0048583	0.262291	8.51945	746
Term	Hofbauer	BP	regulation of catalytic activity	2206	582.5	0.000128791	0.0168384	GO:0050790	0.264053	3.89011	747
Term	Hofbauer	BP	positive regulation of defense response	496	131	0.000279907	0.031838	GO:0031349	0.264113	3.55299	748
Term	Hofbauer	BP	regulation of cell communication	3364	889	5.52526e-05	0.0087898	GO:0010646	0.264269	4.25765	749
Term	Hofbauer	CC	bounding membrane of organelle	1961	518.333	0.00021786	0.0255469	GO:0098588	0.264321	3.66182	750
Term	Hofbauer	BP	immune response	1897	502.333	1.7658e-12	4.01701e-08	GO:0006955	0.264804	11.7531	751
Term	Hofbauer	BP	regulation of signaling	3411	903.5	3.5402e-05	0.00619508	GO:0023051	0.264878	4.45097	752
Term	Hofbauer	CC	cytoplasmic vesicle part	1428	379.667	0.000156794	0.0198161	GO:0044433	0.265873	3.80467	753
Term	Hofbauer	BP	cell surface receptor signaling pathway	2796	743.833	2.57538e-05	0.00500747	GO:0007166	0.266035	4.58916	754
Term	Hofbauer	BP	regulation of signal transduction	3004	807.5	1.0607e-06	0.000402164	GO:0009966	0.268808	5.97441	755
Term	Hofbauer	BP	secretion	1585	426.5	3.57518e-06	0.00111414	GO:0046903	0.269085	5.4467	756
Term	Hofbauer	BP	regulation of response to external stimulus	813	219.167	3.51315e-05	0.00619508	GO:0032101	0.269578	4.4543	757
Term	Hofbauer	BP	negative regulation of cell communication	1356	365.833	0.000497568	0.0483785	GO:0010648	0.269789	3.30315	758
Term	Hofbauer	BP	positive regulation of response to stimulus	2276	614.167	2.12461e-08	1.85896e-05	GO:0048584	0.269845	7.67272	759
Term	Hofbauer	BP	positive regulation of signaling	1770	478.833	9.09472e-05	0.012693	GO:0023056	0.270527	4.04121	760
Term	Hofbauer	BP	positive regulation of cell communication	1763	477.833	7.47107e-05	0.0108254	GO:0010647	0.271034	4.12662	761
Term	Hofbauer	BP	negative regulation of signal transduction	1253	340.333	0.000351838	0.0368846	GO:0009968	0.271615	3.45366	762
Term	Hofbauer	BP	negative regulation of response to stimulus	1619	440	6.00958e-06	0.00162752	GO:0048585	0.271773	5.22116	763
Term	Hofbauer	BP	inflammatory response	748	203.833	2.00705e-08	1.85896e-05	GO:0006954	0.272504	7.69744	764
Term	Hofbauer	BP	movement of cell or subcellular component	2050	562	0.000174563	0.0217002	GO:0006928	0.274146	3.75805	765
Term	Hofbauer	BP	regulation of cellular component organization	2393	656.5	0.000184255	0.0224212	GO:0051128	0.274342	3.73458	766
Term	Hofbauer	BP	immune effector process	1113	305.5	6.14317e-09	7.76395e-06	GO:0002252	0.274483	8.21161	767
Term	Hofbauer	BP	regulation of innate immune response	428	117.5	0.000443313	0.0448219	GO:0045088	0.274533	3.35329	768
Term	Hofbauer	BP	regulation of hydrolase activity	1219	335.667	0.000351018	0.0368846	GO:0051336	0.275362	3.45467	769
Term	Hofbauer	BP	positive regulation of intracellular signal transduction	1031	284	4.59314e-05	0.00762696	GO:1902533	0.275461	4.33789	770
Term	Hofbauer	BP	positive regulation of signal transduction	1609	443.833	1.12409e-05	0.00260938	GO:0009967	0.275844	4.9492	771
Term	Hofbauer	BP	intracellular signal transduction	2794	773	1.53869e-09	3.51956e-06	GO:0035556	0.276664	8.81285	772
Term	Hofbauer	BP	adaptive immune response	392	108.5	0.000206875	0.0245114	GO:0002250	0.276786	3.68429	773
Term	Hofbauer	BP	signal transduction by protein phosphorylation	917	254	0.00049763	0.0483785	GO:0023014	0.27699	3.30309	774
Term	Hofbauer	BP	MAPK cascade	906	251	0.000461997	0.0465043	GO:0000165	0.277042	3.33536	775
Term	Hofbauer	BP	leukocyte mediated immunity	739	205	1.40422e-07	7.82026e-05	GO:0002443	0.277402	6.85256	776
Term	Hofbauer	BP	secretion by cell	1454	404.5	5.70452e-08	4.1862e-05	GO:0032940	0.278198	7.24378	777
Term	Hofbauer	CC	whole membrane	1581	440	2.31324e-05	0.00457598	GO:0098805	0.278305	4.63578	778
Term	Hofbauer	BP	regulation of intracellular signal transduction	1856	519.667	3.2992e-08	2.77976e-05	GO:1902531	0.279993	7.48159	779
Term	Hofbauer	BP	cell motility	1600	448	7.87364e-06	0.00196832	GO:0048870	0.28	5.10382	780
Term	Hofbauer	BP	localization of cell	1600	448	7.87364e-06	0.00196832	GO:0051674	0.28	5.10382	781
Term	Hofbauer	CC	lytic vacuole	650	182	0.00047993	0.0474692	GO:0000323	0.28	3.31882	782
Term	Hofbauer	BP	locomotion	1822	510.5	1.23766e-05	0.00281556	GO:0040011	0.280187	4.9074	783
Term	Hofbauer	BP	immune system development	944	264.667	6.97736e-05	0.0105819	GO:0002520	0.280367	4.15631	784
Term	Hofbauer	BP	positive regulation of cytokine production	443	124.5	7.43004e-05	0.0108254	GO:0001819	0.281038	4.12901	785
Term	Hofbauer	CC	vacuole	740	208	0.000133786	0.0173243	GO:0005773	0.281081	3.87359	786
Term	Hofbauer	BP	regulation of immune system process	1472	415	8.46759e-12	6.42098e-08	GO:0002682	0.281929	11.0722	787
Term	Hofbauer	BP	positive regulation of molecular function	1671	472.667	2.64586e-05	0.005061	GO:0044093	0.282865	4.57743	788
Term	Hofbauer	BP	vesicle-mediated transport	1909	540.091	1.10456e-08	1.19655e-05	GO:0016192	0.282918	7.95681	789
Term	Hofbauer	BP	hematopoietic or lymphoid organ development	893	252.667	7.36501e-05	0.0108095	GO:0048534	0.282941	4.13283	790
Term	Hofbauer	BP	cytokine secretion	228	65	0.00039373	0.0407134	GO:0050663	0.285088	3.4048	791
Term	Hofbauer	MF	enzyme binding	2112	603.833	2.02963e-06	0.000689136	GO:0019899	0.285906	5.69258	792
Term	Hofbauer	BP	negative regulation of immune system process	443	126.667	5.82153e-05	0.00900912	GO:0002683	0.285929	4.23496	793
Term	Hofbauer	BP	hemopoiesis	851	243.667	3.46553e-05	0.00619508	GO:0030097	0.28633	4.46023	794
Term	Hofbauer	BP	regulation of immune response	957	274.833	1.86755e-09	3.5404e-06	GO:0050776	0.287182	8.72873	795
Term	Hofbauer	BP	regulation of immune effector process	379	109	3.48646e-05	0.00619508	GO:0002697	0.287599	4.45762	796
Term	Hofbauer	BP	negative regulation of cytokine production	278	80.1667	0.000154979	0.0196962	GO:0001818	0.288369	3.80973	797
Term	Hofbauer	BP	regulation of cytokine production	683	197.167	6.20635e-08	4.41213e-05	GO:0001817	0.288677	7.20716	798
Term	Hofbauer	BP	positive regulation of catalytic activity	1343	387.833	3.69895e-05	0.0063748	GO:0043085	0.288781	4.43192	799
Term	Hofbauer	BP	cell activation	1310	378.5	4.72405e-11	2.4661e-07	GO:0001775	0.288931	10.3257	800
Term	Hofbauer	CC	vacuolar part	543	157	0.000292904	0.0330413	GO:0044437	0.289134	3.53327	801
Term	Hofbauer	BP	regulated exocytosis	755	218.5	4.52001e-06	0.00128532	GO:0045055	0.289404	5.34486	802
Term	Hofbauer	BP	positive regulation of immune response	754	218.5	1.38416e-07	7.82026e-05	GO:0050778	0.289788	6.85881	803
Term	Hofbauer	BP	cell migration	1450	421	1.47791e-07	8.005e-05	GO:0016477	0.290345	6.83035	804
Term	Hofbauer	BP	positive regulation of cellular component organization	1205	350.333	0.000134793	0.0173243	GO:0051130	0.290733	3.87033	805
Term	Hofbauer	BP	granulocyte activation	484	141	4.05493e-06	0.00121376	GO:0036230	0.291322	5.39202	806
Term	Hofbauer	BP	regulation of locomotion	1023	299.167	1.25432e-05	0.00282519	GO:0040012	0.292441	4.90159	807
Term	Hofbauer	BP	exocytosis	857	251.5	3.10763e-07	0.000147282	GO:0006887	0.293466	6.50757	808
Term	Hofbauer	BP	positive regulation of immune system process	1020	299.5	1.46917e-10	5.57036e-07	GO:0002684	0.293627	9.83293	809
Term	Hofbauer	BP	neutrophil mediated immunity	480	141	1.94502e-06	0.000670413	GO:0002446	0.29375	5.71108	810
Term	Hofbauer	BP	regulation of cellular component movement	1035	304.167	1.79083e-05	0.00380745	GO:0051270	0.293881	4.74694	811
Term	Hofbauer	BP	leukocyte activation	1161	341.5	6.28388e-12	6.42098e-08	GO:0045321	0.294143	11.2018	812
Term	Hofbauer	CC	cytoplasmic vesicle membrane	741	218.167	0.000201357	0.0241088	GO:0030659	0.294422	3.69603	813
Term	Hofbauer	BP	neutrophil activation	478	141	1.74875e-06	0.000631464	GO:0042119	0.294979	5.75727	814
Term	Hofbauer	BP	regulation of cell motility	952	281.167	9.64315e-06	0.00235884	GO:2000145	0.295343	5.01578	815
Term	Hofbauer	BP	cytokine production	751	222.167	2.14833e-09	3.75942e-06	GO:0001816	0.295828	8.6679	816
Term	Hofbauer	BP	leukocyte activation involved in immune response	675	200	4.00232e-09	5.35581e-06	GO:0002366	0.296296	8.39769	817
Term	Hofbauer	BP	autophagy	476	141.5	0.000295314	0.0330413	GO:0006914	0.297269	3.52972	818
Term	Hofbauer	BP	process utilizing autophagic mechanism	476	141.5	0.000295314	0.0330413	GO:0061919	0.297269	3.52972	819
Term	Hofbauer	BP	neutrophil activation involved in immune response	469	140	5.693e-07	0.000239833	GO:0002283	0.298507	6.24466	820
Term	Hofbauer	BP	myeloid leukocyte mediated immunity	529	158	1.36724e-07	7.82026e-05	GO:0002444	0.298677	6.86416	821
Term	Hofbauer	CC	vesicle membrane	760	227.167	7.95603e-05	0.0113831	GO:0012506	0.298904	4.0993	822
Term	Hofbauer	BP	cell activation involved in immune response	679	203	1.84078e-09	3.5404e-06	GO:0002263	0.298969	8.735	823
Term	Hofbauer	BP	biological adhesion	1363	408.5	1.87827e-06	0.000657366	GO:0022610	0.299707	5.72624	824
Term	Hofbauer	BP	neutrophil degranulation	466	140	4.25325e-07	0.00018972	GO:0043312	0.300429	6.37128	825
Term	Hofbauer	BP	cell adhesion	1357	408.5	7.92722e-07	0.000327884	GO:0007155	0.301032	6.10088	826
Term	Hofbauer	BP	negative regulation of inflammatory response	161	48.5	0.000298478	0.0331223	GO:0050728	0.301242	3.52509	827
Term	Hofbauer	BP	negative regulation of intracellular signal transduction	536	161.833	2.93043e-05	0.00537617	GO:1902532	0.301928	4.53307	828
Term	Hofbauer	BP	positive regulation of locomotion	572	173	5.66828e-05	0.00889294	GO:0040017	0.302448	4.24655	829
Term	Hofbauer	BP	leukocyte chemotaxis	212	64.1667	7.81171e-05	0.0112474	GO:0030595	0.302673	4.10725	830
Term	Hofbauer	BP	regulation of hemopoiesis	454	137.5	2.77487e-05	0.00521699	GO:1903706	0.302863	4.55676	831
Term	Hofbauer	BP	leukocyte proliferation	279	84.5	2.22243e-05	0.0045141	GO:0070661	0.302867	4.65317	832
Term	Hofbauer	BP	cell chemotaxis	284	86.1667	4.47273e-05	0.00748163	GO:0060326	0.303404	4.34943	833
Term	Hofbauer	BP	lymphocyte activation	632	192	9.42871e-08	6.12839e-05	GO:0046649	0.303797	7.02555	834
Term	Hofbauer	BP	regulation of apoptotic signaling pathway	390	118.5	0.000197575	0.0238183	GO:2001233	0.303846	3.70427	835
Term	Hofbauer	BP	regulation of cell migration	895	272.167	8.26901e-07	0.00033002	GO:0030334	0.304097	6.08255	836
Term	Hofbauer	BP	interleukin-6 production	151	46	0.000266666	0.0304872	GO:0032635	0.304636	3.57403	837
Term	Hofbauer	CC	vacuolar membrane	396	121	0.000364517	0.0380386	GO:0005774	0.305556	3.43828	838
Term	Hofbauer	BP	cellular response to nitrogen compound	619	189.5	0.000302195	0.033372	GO:1901699	0.306139	3.51971	839
Term	Hofbauer	BP	positive regulation of hydrolase activity	723	221.833	7.27125e-05	0.0107411	GO:0051345	0.306823	4.13839	840
Term	Hofbauer	BP	import into cell	813	249.5	3.80406e-05	0.00650666	GO:0098657	0.306888	4.41975	841
Term	Hofbauer	BP	positive regulation of cellular component movement	559	172	3.22641e-05	0.00587181	GO:0051272	0.307692	4.49128	842
Term	Hofbauer	BP	granulocyte migration	130	40	0.000205399	0.024464	GO:0097530	0.307692	3.6874	843
Term	Hofbauer	BP	myeloid cell activation involved in immune response	523	161	1.36142e-08	1.34657e-05	GO:0002275	0.307839	7.86601	844
Term	Hofbauer	BP	mononuclear cell proliferation	255	78.5	2.27144e-05	0.00457283	GO:0032943	0.307843	4.6437	845
Term	Hofbauer	BP	leukocyte degranulation	512	158	2.12163e-08	1.85896e-05	GO:0043299	0.308594	7.67333	846
Term	Hofbauer	BP	activation of immune response	584	180.5	9.25481e-08	6.12839e-05	GO:0002253	0.309075	7.03363	847
Term	Hofbauer	BP	myeloid leukocyte activation	625	193.5	7.25206e-10	2.35682e-06	GO:0002274	0.3096	9.13954	848
Term	Hofbauer	BP	myeloid leukocyte migration	197	61	5.20185e-05	0.00839268	GO:0097529	0.309645	4.28384	849
Term	Hofbauer	BP	positive regulation of cell motility	542	168	1.82444e-05	0.00382562	GO:2000147	0.309963	4.73887	850
Term	Hofbauer	BP	lymphocyte proliferation	253	78.5	1.64068e-05	0.00358883	GO:0046651	0.310277	4.78498	851
Term	Hofbauer	BP	regulation of leukocyte proliferation	210	65.5	0.000109564	0.0146027	GO:0070663	0.311905	3.96033	852
Term	Hofbauer	BP	granulocyte chemotaxis	115	36	0.000252958	0.0293599	GO:0071621	0.313043	3.59695	853
Term	Hofbauer	BP	regulation of autophagy	313	98	0.000479829	0.0474692	GO:0010506	0.313099	3.31891	854
Term	Hofbauer	BP	endocytosis	693	217.5	1.11333e-05	0.00260938	GO:0006897	0.313853	4.95338	855
Term	Hofbauer	BP	taxis	616	193.5	0.000120131	0.0157968	GO:0042330	0.314123	3.92035	856
Term	Hofbauer	BP	chemotaxis	614	193.5	0.000105852	0.0143335	GO:0006935	0.315147	3.9753	857
Term	Hofbauer	BP	regulation of interleukin-6 production	142	45	0.000102731	0.0139942	GO:0032675	0.316901	3.9883	858
Term	Hofbauer	BP	lymphocyte differentiation	337	107.167	4.21877e-05	0.00715425	GO:0030098	0.318002	4.37481	859
Term	Hofbauer	BP	regulation of cell activation	524	167	1.29651e-08	1.34065e-05	GO:0050865	0.318702	7.88723	860
Term	Hofbauer	BP	leukocyte migration	419	133.667	4.34403e-08	3.40767e-05	GO:0050900	0.319014	7.36211	861
Term	Hofbauer	BP	positive regulation of cell migration	520	166	3.9005e-06	0.0011831	GO:0030335	0.319231	5.40888	862
Term	Hofbauer	BP	regulation of lymphocyte activation	399	127.5	4.19538e-07	0.00018972	GO:0051249	0.319549	6.37723	863
Term	Hofbauer	BP	cellular component morphogenesis	1095	350	0.000479035	0.0474692	GO:0032989	0.319635	3.31963	864
Term	Hofbauer	MF	enzyme activator activity	477	152.5	0.000401518	0.0413265	GO:0008047	0.319706	3.3963	865
Term	Hofbauer	BP	cellular response to organonitrogen compound	561	179.5	7.24082e-05	0.0107411	GO:0071417	0.319964	4.14021	866
Term	Hofbauer	BP	regulation of mononuclear cell proliferation	197	63.5	7.1817e-05	0.0107411	GO:0032944	0.322335	4.14377	867
Term	Hofbauer	BP	regulation of lymphocyte proliferation	196	63.5	6.1829e-05	0.0095037	GO:0050670	0.32398	4.20881	868
Term	Hofbauer	BP	leukocyte differentiation	492	159.667	1.17251e-07	7.40927e-05	GO:0002521	0.324526	6.93088	869
Term	Hofbauer	BP	negative regulation of apoptotic signaling pathway	219	71.1667	0.000170534	0.0213158	GO:2001234	0.324962	3.76819	870
Term	Hofbauer	BP	regulation of leukocyte activation	482	157	3.54232e-09	5.35581e-06	GO:0002694	0.325726	8.45071	871
Term	Hofbauer	BP	negative regulation of cell adhesion	273	89	0.000469477	0.047049	GO:0007162	0.326007	3.32839	872
Term	Hofbauer	CC	secretory granule membrane	286	93.5	1.77567e-05	0.00380745	GO:0030667	0.326923	4.75064	873
Term	Hofbauer	BP	negative regulation of leukocyte activation	165	54	0.00022042	0.0257145	GO:0002695	0.327273	3.65675	874
Term	Hofbauer	BP	immune response-regulating signaling pathway	540	177.5	1.02272e-08	1.19655e-05	GO:0002764	0.328704	7.99024	875
Term	Hofbauer	BP	leukocyte cell-cell adhesion	319	105	8.22151e-07	0.00033002	GO:0007159	0.329154	6.08505	876
Term	Hofbauer	BP	T cell activation	443	146	3.94451e-08	3.20478e-05	GO:0042110	0.329571	7.40401	877
Term	Hofbauer	BP	regulation of cell-cell adhesion	385	127	5.6636e-06	0.0015523	GO:0022407	0.32987	5.24691	878
Term	Hofbauer	BP	positive regulation of cell activation	310	102.5	1.79393e-06	0.000637658	GO:0050867	0.330645	5.74619	879
Term	Hofbauer	BP	regulation of leukocyte cell-cell adhesion	287	95	4.2928e-06	0.00125201	GO:1903037	0.33101	5.36726	880
Term	Hofbauer	BP	cell morphogenesis	987	328	0.000109766	0.0146027	GO:0000902	0.33232	3.95953	881
Term	Hofbauer	BP	regulation of interferon-gamma production	93	31	0.000436866	0.0443673	GO:0032649	0.333333	3.35965	882
Term	Hofbauer	BP	actin filament-based process	725	242.5	2.41722e-05	0.00474046	GO:0030029	0.334483	4.61668	883
Term	Hofbauer	BP	positive regulation of leukocyte activation	297	99.5	1.46572e-06	0.000537801	GO:0002696	0.335017	5.83395	884
Term	Hofbauer	BP	immune response-activating signal transduction	508	170.5	3.87142e-09	5.35581e-06	GO:0002757	0.33563	8.41213	885
Term	Hofbauer	BP	positive regulation of lymphocyte activation	253	85.5	1.91623e-05	0.00392723	GO:0051251	0.337945	4.71755	886
Term	Hofbauer	CC	tertiary granule	158	53.5	2.64741e-05	0.005061	GO:0070820	0.338608	4.57718	887
Term	Hofbauer	BP	T cell differentiation	236	80.1667	8.42532e-05	0.0119792	GO:0030217	0.339689	4.07441	888
Term	Hofbauer	BP	immune response-regulating cell surface receptor signaling pathway	380	129.5	4.61955e-07	0.000202096	GO:0002768	0.340789	6.3354	889
Term	Hofbauer	BP	regulation of actin cytoskeleton organization	327	111.5	0.000403292	0.0413265	GO:0032956	0.340979	3.39438	890
Term	Hofbauer	CC	cell-substrate junction	397	137.5	0.000328641	0.0352653	GO:0030055	0.346348	3.48328	891
Term	Hofbauer	BP	actin cytoskeleton organization	635	220	6.52651e-06	0.00174672	GO:0030036	0.346457	5.18532	892
Term	Hofbauer	BP	regulation of T cell activation	301	104.5	1.40943e-07	7.82026e-05	GO:0050863	0.347176	6.85096	893
Term	Hofbauer	BP	regulation of cell adhesion	659	229.5	1.54713e-09	3.51956e-06	GO:0030155	0.348255	8.81047	894
Term	Hofbauer	CC	cell-substrate adherens junction	394	137.5	0.000214884	0.0253285	GO:0005924	0.348985	3.6678	895
Term	Hofbauer	CC	membrane region	316	110.5	0.000117859	0.0155882	GO:0098589	0.349684	3.92864	896
Term	Hofbauer	CC	focal adhesion	392	137.5	0.00018375	0.0224212	GO:0005925	0.350765	3.73577	897
Term	Hofbauer	BP	immune response-activating cell surface receptor signaling pathway	349	122.5	1.60948e-07	8.51491e-05	GO:0002429	0.351003	6.79331	898
Term	Hofbauer	BP	phagocytosis	258	91	3.41872e-05	0.00617241	GO:0006909	0.352713	4.46614	899
Term	Hofbauer	BP	myeloid leukocyte differentiation	196	69.5	0.000108528	0.0146027	GO:0002573	0.354592	3.96446	900
Term	Hofbauer	BP	antigen receptor-mediated signaling pathway	231	82	1.83301e-05	0.00382562	GO:0050851	0.354978	4.73683	901
Term	Hofbauer	CC	membrane microdomain	304	108	8.90812e-05	0.0125093	GO:0098857	0.355263	4.05021	902
Term	Hofbauer	BP	Ras protein signal transduction	417	148.167	1.90705e-05	0.00392723	GO:0007265	0.355316	4.71964	903
Term	Hofbauer	CC	membrane raft	303	108	7.0348e-05	0.0105983	GO:0045121	0.356436	4.15275	904
Term	Hofbauer	CC	anchoring junction	541	194	4.7528e-06	0.00133483	GO:0070161	0.358595	5.32305	905
Term	Hofbauer	BP	regulation of leukocyte differentiation	261	94	2.28792e-07	0.000113148	GO:1902105	0.360153	6.64056	906
Term	Hofbauer	BP	regulation of GTPase activity	435	157	1.16803e-05	0.00268399	GO:0043087	0.36092	4.93255	907
Term	Hofbauer	BP	regulation of actin filament organization	247	89.5	0.000311009	0.0335315	GO:0110053	0.362348	3.50723	908
Term	Hofbauer	CC	adherens junction	526	191	3.68554e-06	0.001133	GO:0005912	0.363118	5.4335	909
Term	Hofbauer	BP	positive regulation of GTPase activity	366	133.5	2.71955e-05	0.00515559	GO:0043547	0.364754	4.5655	910
Term	Hofbauer	BP	small GTPase mediated signal transduction	532	194.167	2.37036e-07	0.00011473	GO:0007264	0.364975	6.62519	911
Term	Hofbauer	BP	actin filament organization	378	138	1.28266e-05	0.00286072	GO:0007015	0.365079	4.89189	912
Term	Hofbauer	BP	positive regulation of T cell proliferation	89	32.5	0.000296296	0.0330413	GO:0042102	0.365169	3.52827	913
Term	Hofbauer	MF	cytokine receptor activity	87	32	0.000197884	0.0238183	GO:0004896	0.367816	3.70359	914
Term	Hofbauer	BP	positive regulation of leukocyte cell-cell adhesion	207	76.5	2.29997e-06	0.000760716	GO:1903039	0.369565	5.63828	915
Term	Hofbauer	BP	positive regulation of T cell activation	193	72	2.30733e-06	0.000760716	GO:0050870	0.373057	5.63689	916
Term	Hofbauer	BP	regulation of lymphocyte differentiation	162	60.5	2.85464e-05	0.00527969	GO:0045619	0.373457	4.54445	917
Term	Hofbauer	BP	regulation of cell morphogenesis	459	171.5	7.50038e-06	0.00191715	GO:0022604	0.373638	5.12492	918
Term	Hofbauer	BP	positive regulation of cell-cell adhesion	244	91.5	2.17972e-07	0.000110192	GO:0022409	0.375	6.6616	919
Term	Hofbauer	BP	negative regulation of immune effector process	114	43	2.84992e-05	0.00527969	GO:0002698	0.377193	4.54517	920
Term	Hofbauer	BP	alpha-beta T cell activation	129	49.1667	0.000136474	0.0174419	GO:0046631	0.381137	3.86495	921
Term	Hofbauer	BP	positive regulation of cell adhesion	388	148	9.41354e-10	2.67686e-06	GO:0045785	0.381443	9.02625	922
Term	Hofbauer	MF	GTPase binding	498	191	1.05982e-08	1.19655e-05	GO:0051020	0.383534	7.97477	923
Term	Hofbauer	BP	Fc receptor signaling pathway	171	66	6.87671e-05	0.0104992	GO:0038093	0.385965	4.16262	924
Term	Hofbauer	BP	regulation of T cell differentiation	136	52.5	4.81177e-05	0.0079321	GO:0045580	0.386029	4.3177	925
Term	Hofbauer	MF	GTPase activator activity	242	94.5	0.000134545	0.0173243	GO:0005096	0.390496	3.87113	926
Term	Hofbauer	MF	small GTPase binding	404	158	1.67685e-07	8.66968e-05	GO:0031267	0.391089	6.77551	927
Term	Hofbauer	MF	Ras GTPase binding	390	155	6.53222e-08	4.50307e-05	GO:0017016	0.397436	7.18494	928
Term	Hofbauer	BP	negative regulation of interleukin-6 production	50	20	0.000101617	0.0139258	GO:0032715	0.4	3.99303	929
Term	Hofbauer	BP	regulation of small GTPase mediated signal transduction	315	126.667	7.21425e-06	0.00186497	GO:0051056	0.402116	5.14181	930
Term	Hofbauer	BP	regulation of Ras protein signal transduction	224	90.6667	0.000184305	0.0224212	GO:0046578	0.404762	3.73446	931
Term	Hofbauer	CC	cell leading edge	389	158.5	4.86483e-08	3.689e-05	GO:0031252	0.407455	7.31293	932
Term	Hofbauer	BP	macrophage activation	91	38	4.37575e-06	0.00126005	GO:0042116	0.417582	5.35895	933
Term	Hofbauer	MF	guanyl-nucleotide exchange factor activity	206	87	1.43666e-05	0.00317306	GO:0005085	0.42233	4.84265	934
Term	Hofbauer	BP	actin filament bundle organization	151	64	5.66144e-05	0.00889294	GO:0061572	0.423841	4.24707	935
Term	Hofbauer	BP	regulation of actomyosin structure organization	92	39	0.00034641	0.0366534	GO:0110020	0.423913	3.46041	936
Term	Hofbauer	BP	actin filament bundle assembly	148	63	5.28221e-05	0.00846232	GO:0051017	0.425676	4.27718	937
Term	Hofbauer	CC	tertiary granule membrane	69	29.5	5.05359e-05	0.00821172	GO:0070821	0.427536	4.2964	938
Term	Hofbauer	BP	regulation of actin filament bundle assembly	93	40	0.000408639	0.0416867	GO:0032231	0.430108	3.38866	939
Term	Hofbauer	CC	ficolin-1-rich granule membrane	59	26	8.82599e-05	0.012471	GO:0101003	0.440678	4.05424	940
Term	Hofbauer	CC	lamellipodium	187	83.5	3.36889e-06	0.00106443	GO:0030027	0.446524	5.47251	941
Term	Hofbauer	CC	actin filament	102	46.5	0.000179305	0.0221686	GO:0005884	0.455882	3.74641	942
Term	Hofbauer	CC	ruffle	167	76.5	1.29648e-06	0.000483502	GO:0001726	0.458084	5.88723	943
Term	Hofbauer	BP	adherens junction organization	140	64.5	0.000101183	0.0139258	GO:0034332	0.460714	3.99489	944
Term	Hofbauer	MF	Rho GTPase binding	160	74	2.46331e-06	0.000800542	GO:0017048	0.4625	5.60848	945
Term	Hofbauer	BP	regulation of cell shape	144	67	9.80664e-07	0.000378121	GO:0008360	0.465278	6.00848	946
Term	Hofbauer	BP	adherens junction assembly	88	43.5	0.000387969	0.040301	GO:0034333	0.494318	3.4112	947
Term	Hofbauer	BP	ruffle organization	52	26	9.99945e-05	0.0138706	GO:0031529	0.5	4.00002	948
Term	Hofbauer	BP	cell-substrate adherens junction assembly	79	40.5	0.000266691	0.0304872	GO:0007045	0.512658	3.57399	949
Term	Hofbauer	BP	focal adhesion assembly	79	40.5	0.000266691	0.0304872	GO:0048041	0.512658	3.57399	950
Term	Hofbauer	BP	Fc-gamma receptor signaling pathway	78	40	7.19839e-06	0.00186497	GO:0038094	0.512821	5.14276	951
Term	Hofbauer	BP	respiratory burst	29	15	0.00016913	0.0212571	GO:0045730	0.517241	3.77178	952
Term	Hofbauer	BP	Fc receptor mediated stimulatory signaling pathway	81	42	4.23903e-06	0.00125201	GO:0002431	0.518519	5.37273	953
Term	Hofbauer	BP	immune response-regulating cell surface receptor signaling pathway involved in phagocytosis	75	39	1.11334e-05	0.00260938	GO:0002433	0.52	4.95337	954
Term	Hofbauer	BP	Fc-gamma receptor signaling pathway involved in phagocytosis	75	39	1.11334e-05	0.00260938	GO:0038096	0.52	4.95337	955
Term	Hofbauer	BP	B cell receptor signaling pathway	58	33	4.03758e-07	0.000187451	GO:0050853	0.568966	6.39388	956
Term	Hofbauer	MF	lipopeptide binding	10	7	1.6843e-05	0.00364915	GO:0071723	0.7	4.77358	957
Term	Hofbauer	MF	lipid antigen binding	5	4	0.000310595	0.0335315	GO:0030882	0.8	3.50781	958
Term	Hofbauer	MF	endogenous lipid antigen binding	5	4	0.000310595	0.0335315	GO:0030883	0.8	3.50781	959
Term	Hofbauer	MF	exogenous lipid antigen binding	5	4	0.000310595	0.0335315	GO:0030884	0.8	3.50781	960
Term	Hofbauer	BP	antigen processing and presentation, endogenous lipid antigen via MHC class Ib	5	4	0.000310595	0.0335315	GO:0048006	0.8	3.50781	961
Term	Stromal	CC	extracellular matrix	501	158	4.57226e-07	0.00346714	GO:0031012	0.315369	6.33987	962
Term	Stromal	CC	collagen-containing extracellular matrix	385	132	4.89621e-08	0.00055692	GO:0062023	0.342857	7.31014	963
Term	Stromal	BP	actin cytoskeleton organization	635	219	1.80022e-06	0.00819065	GO:0030036	0.344882	5.74467	964
Term	Stromal	BP	actin filament-based process	725	253	2.02672e-08	0.000461058	GO:0030029	0.348966	7.69321	965
Term	Stromal	CC	anchoring junction	541	189.667	9.13373e-06	0.0296833	GO:0070161	0.350585	5.03935	966
Term	Stromal	CC	actin cytoskeleton	492	172.833	4.86322e-06	0.0184389	GO:0015629	0.351287	5.31308	967
Term	Stromal	MF	collagen binding	67	36.5	8.82894e-07	0.00502124	GO:0005518	0.544776	6.05409	968

## Sheet: s6
Group	Celltype	Description	N	DE	P.DE	FDR	ID	Generatio	neg_log_P	Order
First	Endothelial	Cytokine-cytokine receptor interaction	268	57.8333	0.00415695	0.0483066	path:hsa04060	0.215796	2.38123	1
First	Endothelial	Pathways in cancer	507	155.5	0.00358346	0.0483066	path:hsa05200	0.306706	2.4457	2
First	Endothelial	Shigellosis	232	77	0.000261019	0.0147357	path:hsa05131	0.331897	3.58333	3
First	Endothelial	Natural killer cell mediated cytotoxicity	114	38	0.00294343	0.0472351	path:hsa04650	0.333333	2.53115	4
First	Endothelial	Chemokine signaling pathway	180	62.5	0.000349809	0.0147357	path:hsa04062	0.347222	3.45617	5
First	Endothelial	Malaria	48	17	0.00432651	0.0486011	path:hsa05144	0.354167	2.36386	6
First	Endothelial	Proteoglycans in cancer	199	70.5	0.00401612	0.0483066	path:hsa05205	0.354271	2.39619	7
First	Endothelial	TGF-beta signaling pathway	94	34.5	0.00255289	0.0441775	path:hsa04350	0.367021	2.59297	8
First	Endothelial	Chagas disease	98	36	0.00109313	0.0263131	path:hsa05142	0.367347	2.96133	9
First	Endothelial	Relaxin signaling pathway	125	46	0.00447597	0.0486581	path:hsa04926	0.368	2.34911	10
First	Endothelial	Th17 cell differentiation	102	38	0.00466358	0.0491133	path:hsa04659	0.372549	2.33128	11
First	Endothelial	Osteoclast differentiation	118	44	0.000592066	0.0166272	path:hsa04380	0.372881	3.22763	12
First	Endothelial	HIF-1 signaling pathway	105	39.5	0.00411659	0.0483066	path:hsa04066	0.37619	2.38546	13
First	Endothelial	Autophagy - animal	130	49	0.00153927	0.0324209	path:hsa04140	0.376923	2.81269	14
First	Endothelial	Rap1 signaling pathway	207	79.5	0.000540457	0.0165576	path:hsa04015	0.384058	3.26724	15
First	Endothelial	PD-L1 expression and PD-1 checkpoint pathway in cancer	88	34	0.00190944	0.0378519	path:hsa05235	0.386364	2.71909	16
First	Endothelial	Focal adhesion	193	75	0.00211658	0.0396271	path:hsa04510	0.388601	2.67437	17
First	Endothelial	Regulation of actin cytoskeleton	203	80	4.74397e-05	0.00532906	path:hsa04810	0.394089	4.32386	18
First	Endothelial	Leukocyte transendothelial migration	107	42.5	0.000296942	0.0147357	path:hsa04670	0.397196	3.52733	19
First	Endothelial	Phospholipase D signaling pathway	144	57.5	0.00384268	0.0483066	path:hsa04072	0.399306	2.41537	20
First	Endothelial	Inflammatory bowel disease	61	25	0.000417547	0.0156348	path:hsa05321	0.409836	3.37929	21
First	Endothelial	Platelet activation	123	50.5	0.000341106	0.0147357	path:hsa04611	0.410569	3.46711	22
First	Endothelial	Fc gamma R-mediated phagocytosis	87	36	0.00411531	0.0483066	path:hsa04666	0.413793	2.3856	23
First	Endothelial	Parathyroid hormone synthesis, secretion and action	105	43.5	0.00391641	0.0483066	path:hsa04928	0.414286	2.40711	24
First	Endothelial	Cholinergic synapse	112	46.5	0.00345699	0.0483066	path:hsa04725	0.415179	2.4613	25
First	Endothelial	AGE-RAGE signaling pathway in diabetic complications	95	39.5	0.000689127	0.0178643	path:hsa04933	0.415789	3.1617	26
First	Endothelial	Colorectal cancer	84	35.5	0.00137936	0.0309896	path:hsa05210	0.422619	2.86032	27
First	Endothelial	Fc epsilon RI signaling pathway	66	28	0.00262181	0.0441775	path:hsa04664	0.424242	2.5814	28
First	Endothelial	Yersinia infection	123	55	6.37682e-06	0.00214899	path:hsa05135	0.447154	5.1954	29
First	Endothelial	Pancreatic cancer	73	33	0.0005065	0.0165576	path:hsa05212	0.452055	3.29542	30
First	Endothelial	Acute myeloid leukemia	63	31	0.000161714	0.0136244	path:hsa05221	0.492063	3.79125	31
First	Endothelial	Adherens junction	70	38.5	1.98546e-05	0.00334549	path:hsa04520	0.55	4.70214	32
First	Hofbauer	Chemokine signaling pathway	180	64.5	0.000534797	0.0257466	path:hsa04062	0.358333	3.27181	33
First	Hofbauer	Human T-cell leukemia virus 1 infection	211	76.3333	0.0014401	0.0478661	path:hsa05166	0.361769	2.84161	34
First	Hofbauer	Osteoclast differentiation	118	45.5	0.00109197	0.0408882	path:hsa04380	0.385593	2.96179	35
First	Hofbauer	Apelin signaling pathway	136	53	0.0015624	0.0478661	path:hsa04371	0.389706	2.80621	36
First	Hofbauer	Yersinia infection	123	53	0.000149273	0.0167683	path:hsa05135	0.430894	3.82602	37
First	Hofbauer	T cell receptor signaling pathway	99	43	0.000413047	0.0231995	path:hsa04660	0.434343	3.384	38
First	Hofbauer	Autophagy - animal	130	56.5	5.55486e-05	0.00935994	path:hsa04140	0.434615	4.25533	39
First	Hofbauer	B cell receptor signaling pathway	76	34	0.000332997	0.022444	path:hsa04662	0.447368	3.47756	40
First	Hofbauer	Acute myeloid leukemia	63	30	0.00107448	0.0408882	path:hsa05221	0.47619	2.9688	41
First	Hofbauer	Bacterial invasion of epithelial cells	72	35	0.00029324	0.022444	path:hsa05100	0.486111	3.53278	42
First	Hofbauer	Fc gamma R-mediated phagocytosis	87	44	2.09502e-05	0.00706022	path:hsa04666	0.505747	4.67881	43
First	Stromal	Shigellosis	232	81	0.000185262	0.0172432	path:hsa05131	0.349138	3.73221	44
First	Stromal	Chemokine signaling pathway	180	64.3333	0.000440759	0.0297071	path:hsa04062	0.357407	3.3558	45
First	Stromal	Ras signaling pathway	223	84.3333	0.000699247	0.0336638	path:hsa04014	0.378176	3.15537	46
First	Stromal	Endocytosis	238	92.5	6.21901e-05	0.010479	path:hsa04144	0.388655	4.20628	47
First	Stromal	Rap1 signaling pathway	207	84	0.000204667	0.0172432	path:hsa04015	0.405797	3.68895	48
First	Stromal	Focal adhesion	193	79	0.00126797	0.0427305	path:hsa04510	0.409326	2.89689	49
First	Stromal	AGE-RAGE signaling pathway in diabetic complications	95	40	0.000976781	0.036575	path:hsa04933	0.421053	3.0102	50
First	Stromal	Yersinia infection	123	55.5	3.1248e-05	0.010479	path:hsa05135	0.45122	4.50518	51
First	Stromal	Longevity regulating pathway	88	40.5	0.000535621	0.030084	path:hsa04211	0.460227	3.27114	52
First	Stromal	EGFR tyrosine kinase inhibitor resistance	77	38	0.00089538	0.036575	path:hsa01521	0.493506	3.04799	53
First	Trophoblasts	ECM-receptor interaction	86	42.3333	1.33423e-05	0.00449637	path:hsa04512	0.492248	4.87477	54
Term	Endothelial	Adherens junction	70	37.5	5.15145e-05	0.0173604	path:hsa04520	0.535714	4.28807	55
Term	Hofbauer	Cytokine-cytokine receptor interaction	268	64.5	0.000440431	0.049475	path:hsa04060	0.240672	3.35612	56
Term	Hofbauer	Apelin signaling pathway	136	54	0.00025973	0.0437646	path:hsa04371	0.397059	3.58548	57
Term	Hofbauer	Hematopoietic cell lineage	90	36.5	1.57975e-05	0.00532377	path:hsa04640	0.405556	4.80141	58
Term	Trophoblasts	Regulation of actin cytoskeleton	203	79	2.78261e-05	0.0093774	path:hsa04810	0.389163	4.55555	59

## Sheet: s5_s6_legend
Group	Trimester of the DMC
Celltype	Which celltype for DMC
Description	Description of the GO term or KEGG pathway
N	The number of CpGs in genes for this term/pathway
DE	The number of differentially methylated CpGs for this term/pathway
P.DE	p value
FDR	False discovery rate
ID
Generatio	DE / N
neg_log_P	negative log 10 p value
Order	significance ranking

## Sheet: s7
chr	start	end	methylated_allele	tissue_specificity	associated_gene	court	hanna	sanchez_delgado	zink	hamada	note
1	6684860	6685996	M	placental-specific	THAP3		TRUE
1	7827139	7827709	M	other					TRUE
1	19614429	19615702	M	placental-specific	AKR7A3		TRUE
1	36184400	36184863	M	placental-specific	C1orf216		TRUE
1	38200920	38201123	M	other	EPHA10		TRUE
1	39559602	39559980	M	other	PPIEL				TRUE
1	40024626	40026520	M	other	PPIEL	TRUE	TRUE
1	54940382	54941170	M	placental-specific	ACOT11		TRUE
1	55504848	55506512	M	placental-specific	PCSK9		TRUE
1	67772896	67773725	M	placental-specific	IL12RB2		TRUE
1	68050532	68051790	M	other	DIRAS3/GNG12-AS1				TRUE
1	68511835	68513486	M	other	DIRAS3	TRUE	TRUE
1	68515433	68517545	M	other	DIRAS3	TRUE	TRUE
1	175568216	175568710	M	placental-specific	TNR		TRUE
1	177032657	177032837	M	other					TRUE
1	181286640	181287967	M	placental-specific	CACNA1E		TRUE			TRUE
1	209848306	209849445	M	placental-specific	G0S2		TRUE			TRUE
1	209848306	209849445	M	placental-specific	G0S2		TRUE			TRUE
1	211589678	211590292	M	placental-specific	LINC00467		TRUE
2	27484942	27488313	M	placental-specific	SLC30A3		TRUE			TRUE
2	42067938	42068648	M	placental-specific	C2orf91		TRUE			TRUE
2	45231226	45232888	M	placental-specific	SIX2		TRUE
2	46655894	46657384	M	placental-specific	TMEM247			TRUE		TRUE
2	74345587	74348298	M	placental-specific	TET3			TRUE		TRUE
2	94871304	94872050	P	other					TRUE
2	130037382	130038260	M	other					TRUE
2	131300169	131300522	M	other					TRUE
2	136766706	136767019	M	other					TRUE
2	196933266	196934154	M	placental-specific	DNAH7		TRUE
2	206249787	206253341	P	other	ZDBF2/GPR1-AS				TRUE
2	206254404	206255173	P	other	ZDBF2				TRUE
2	206255756	206258686	P	other	ZDBF2				TRUE
2	206259834	206260336	P	other	ZDBF2				TRUE
2	206261783	206265613	P	other	ZDBF2/GPR1-AS				TRUE
2	206266861	206268649	P	other	ZDBF2				TRUE
2	206269197	206270970	P	other	ZDBF2				TRUE
2	206271479	206272728	P	other	ZDBF2				TRUE
2	206273392	206274051	P	other	ZDBF2				TRUE
2	207066967	207069445	M	placental-specific	GPR1-AS	TRUE	TRUE
2	207114583	207136544	P	other		TRUE
2	209208321	209209864	M	other					TRUE
2	229043530	229047055	M	placental-specific	SPHKAP		TRUE	TRUE		TRUE
2	229043530	229047055	M	placental-specific	SPHKAP		TRUE	TRUE		TRUE
2	232351651	232352005	M	other					TRUE
2	240557132	240557566	M	other					TRUE
3	11704930	11705437	M	other					TRUE
3	21790873	21792537	M	placental-specific	ZNF385D			TRUE		TRUE
3	30894288	30894468	M	other					TRUE
3	30936070	30936531	M	placental-specific	GADL1		TRUE
3	39501848	39502216	M	other					TRUE
3	49314155	49314920	M	placental-specific	C3orf62		TRUE			TRUE
3	51740741	51741473	M	other	GRM2		TRUE
3	128336483	128337044	M	placental-specific	RPN1		TRUE			TRUE
3	128564782	128565090	M	other	RAB7A		TRUE
3	182815725	182817627	M	placental-specific	MCCC1	TRUE	TRUE
3	192124589	192127457	M	placental-specific	FGF12		TRUE	TRUE		TRUE
3	192571291	192571834	M	other					TRUE
3	196756621	196756875	M	other	MFI2		TRUE
4	4576220	4577911	M	placental-specific	STX18-AS1			TRUE
4	6104931	6106089	M	other	JAKMIP1				TRUE
4	6107021	6107791	M	other	JAKMIP1		TRUE
4	8580973	8581784	M	other					TRUE
4	17641982	17642265	M	other					TRUE
4	88697379	88698217	M	other	NAP1L5/HERC3				TRUE
4	89617925	89619237	M	other	NAP1L5	TRUE	TRUE
4	93226245	93227270	M	placental-specific	GRID2		TRUE			TRUE
4	93226245	93227270	M	placental-specific	GRID2		TRUE			TRUE
4	102711702	102712397	M	placental-specific	BANK1		TRUE
4	119455534	119455914	M	other					TRUE
4	121932574	121933160	M	other					TRUE
4	154709200	154715220	M	placental-specific	SFRP2			TRUE		TRUE
4	154709200	154715220	M	placental-specific	SFRP2			TRUE		TRUE
4	169774385	169774935	M	other					TRUE
4	187065417	187066505	M	placental-specific	FAM149A		TRUE
5	1594021	1595048	M	placental-specific	SDHAP3		TRUE			TRUE
5	15271459	15271770	M	other					TRUE
5	15384409	15384881	M	other					TRUE
5	58333774	58336554	M	placental-specific	PDE4D	TRUE	TRUE
5	95066568	95068092	M	placental-specific	RHOBTB3		TRUE
5	135767915	135768919	M	other					TRUE
5	135769815	135771319	M	other					TRUE
5	135778208	135778521	M	other					TRUE
5	136078784	136080957	M	other	VTRNA2-1				TRUE
5	178593785	178594990	M	other	ZNF354C		TRUE
6	3848512	3850359	M	other	FAM50B	TRUE	TRUE		TRUE
6	14117480	14118415	M	placental-specific	CD83		TRUE
6	18387077	18387809	M	other	RNF144B		TRUE
6	31627653	31628935	M	other	C6orf47		TRUE
6	37616410	37617124	M	placental-specific	MDGA1		TRUE
6	39901897	39902693	M	placental-specific	MOCS1		TRUE
6	103332287	103333035	M	other					TRUE
6	105400631	105402559	M	placental-specific	LIN28B	TRUE	TRUE
6	106957945	106961974	M	placental-specific	AIM1	TRUE	TRUE
6	144007163	144009025	M	other	PLAGL1				TRUE
6	144328078	144329922	M	other	PLAGL1	TRUE	TRUE
6	160005255	160006715	M	other	IGF2R				TRUE
6	160426558	160427561	M	other		TRUE
6	161188022	161188822	M	placental-specific	PLG		TRUE
6	169577181	169577797	M	other					TRUE
6	169654367	169655912	M	other	WDR27				TRUE
6	170054504	170055618	M	other		TRUE
7	12609907	12610833	M	placental-specific	SCIN		TRUE
7	16850625	16851508	M	other					TRUE
7	22122473	22123315	M	placental-specific	RAPGEF5		TRUE			TRUE
7	23490380	23491301	M	other	RPS2P32				TRUE
7	24323128	24325371	M	placental-specific	NPY		TRUE			TRUE
7	24323128	24325371	M	placental-specific	NPY		TRUE			TRUE
7	42856558	42857371	M	other					TRUE
7	43151828	43153950	M	placental-specific	HECW1		TRUE
7	50781399	50783614	M	other	GRB10				TRUE
7	50848726	50851312	M	other		TRUE
7	64575091	64575739	M	other					TRUE
7	81240257	81240667	M	other	HGF		TRUE
7	94285501	94287960	M	other	PEG10/SGCE	TRUE	TRUE
7	100091181	100091786	M	placental-specific	NYAP1		TRUE
7	101006052	101006963	M	placental-specific	EMID2		TRUE			TRUE
7	106300098	106302548	M	placental-specific	CCDC71L		TRUE			TRUE
7	106300098	106302548	M	placental-specific	CCDC71L		TRUE			TRUE
7	130130122	130134388	M	other	MEST/MESTIT1	TRUE	TRUE
7	130489758	130494000	M	other	MEST				TRUE
7	134671024	134672011	M	placental-specific	AGBL3	TRUE	TRUE
7	134831752	134832178	M	other					TRUE
7	138664014	138664236	M	other	SVOPL				TRUE
7	149389444	149389941	M	other	KRBA1		TRUE			TRUE
7	154585539	154586375	M	other	DPP6		TRUE
7	154861569	154863382	M	other	HTR5A	TRUE	TRUE
7	155070814	155072164	M	other	HTR5A				TRUE
8	8702335	8703302	M	other					TRUE
8	11659497	11660209	M	other	FDFT1		TRUE
8	22010755	22011096	M	other					TRUE
8	23145610	23146931	M	placental-specific	R3HCC1			TRUE
8	27182871	27183342	M	other	PTK2B		TRUE
8	37604992	37606088	M	other	ERLIN2	TRUE	TRUE
8	61626185	61627281	M	other	CHD7		TRUE			TRUE
8	94119077	94120749	M	other					TRUE
8	102527935	102529486	M	other					TRUE
8	135707227	135710114	M	placental-specific		TRUE
8	140035407	140035811	P	other					TRUE
8	140038516	140038940	P	other					TRUE
8	140085725	140086791	P	other					TRUE
8	140088744	140088969	P	other					TRUE
8	140097560	140101293	M	other	TRAPPC9				TRUE
8	141107717	141111081	M	other	TRAPPC9	TRUE	TRUE
8	142215227	142216514	M	placental-specific	DENND3			TRUE		TRUE
8	142215227	142216514	M	placental-specific	DENND3			TRUE		TRUE
9	73568	73835	M	placental-specific	PGM5P3-AS1		TRUE
9	4297279	4300432	M	placental-specific	GLIS3	TRUE	TRUE
9	34989434	34989605	M	placental-specific	DNAJB5		TRUE
9	37800140	37802937	M	placental-specific	DCAF10	TRUE	TRUE
9	86136501	86137778	M	placental-specific	FRMD3			TRUE
9	86151350	86154260	M	placental-specific	FRMD3			TRUE		TRUE
9	137416835	137418376	M	other					TRUE
9	140301079	140302117	M	placental-specific	EXD3		TRUE
10	11936672	11937255	M	placental-specific	PROSER2-AS1		TRUE			TRUE
10	11936672	11937255	M	placental-specific	PROSER2-AS1		TRUE			TRUE
10	15761192	15762312	M	placental-specific	ITGA8		TRUE			TRUE
10	27702309	27703547	M	other	PTCHD3		TRUE			TRUE
10	27702309	27703547	M	other	PTCHD3		TRUE			TRUE
10	65224441	65225999	M	placental-specific	JMJD1C		TRUE			TRUE
10	103534501	103536348	M	placental-specific	FGF8		TRUE
10	121577530	121578846	M	other	INPP5F	TRUE	TRUE
10	128993405	128995242	M	placental-specific	FAM196A/DOCK1	TRUE	TRUE
10	130190919	130191634	M	other					TRUE
10	135278717	135279147	M	other	SPRN		TRUE
10	135341528	135343280	M	placental-specific	CYP2E1		TRUE			TRUE
11	2016513	2024740	P	other	H19	TRUE	TRUE
11	2132351	2133881	P	other	IGF2				TRUE
11	2145821	2149292	P	other	IGF2				TRUE
11	2153991	2155112	P	other		TRUE
11	2168333	2169768	P	other		TRUE
11	2490964	2492685	M	placental-specific	KCNQ1			TRUE
11	2699100	2700636	M	other	KvDMR1				TRUE
11	2719948	2722440	M	other	KCNQ1OT1	TRUE	TRUE
11	3662967	3663842	M	other	ART5		TRUE
11	7088843	7089383	M	other					TRUE
11	10562070	10563302	M	placental-specific	RNF141		TRUE
11	19366443	19368277	M	placental-specific	NAV2		TRUE
11	45201741	45202557	M	placental-specific	PRDM11		TRUE
11	45921134	45922184	M	placental-specific	MAPK8IP1		TRUE
11	60647012	60647445	M	other					TRUE
11	68451396	68452097	M	placental-specific	GAL		TRUE
11	109962727	109964976	M	placental-specific	ZC3H12C	TRUE	TRUE
12	203429	204151	M	other					TRUE
12	2800562	2800919	M	placental-specific	CACNA1C			TRUE
12	4433587	4433983	M	placental-specific	C12orf5		TRUE			TRUE
12	22487219	22488465	M	placental-specific	ST8SIA1		TRUE
12	34218926	34219575	P	other					TRUE
12	34362974	34363820	M	other					TRUE
12	34372206	34374112	M	other					TRUE
12	65121923	65122279	M	other					TRUE
12	65218069	65218869	M	placental-specific	TBC1D30		TRUE
13	33000694	33002597	M	placental-specific	N4BP2L1	TRUE	TRUE
13	48317165	48320825	M	other	RB1				TRUE
13	48892341	48895763	M	other		TRUE
13	51417469	51418614	M	other	DLEU7		TRUE
13	60267520	60269245	M	other					TRUE
13	70680712	70683111	M	other	KLHL1		TRUE
13	80654825	80655272	M	other					TRUE
13	102568126	102569981	M	placental-specific	FGF14			TRUE		TRUE
14	24563095	24564067	M	placental-specific	NRL		TRUE			TRUE
14	33799741	33800646	M	other					TRUE
14	52734156	52736420	M	placental-specific	PTGDR		TRUE			TRUE
14	68874777	68874992	M	other					TRUE
14	100727514	100728411	M	other					TRUE
14	100807670	100811737	P	other	IG-DMR				TRUE
14	100823704	100825381	P	other	MEG3				TRUE
14	100826012	100828230	P	other	MEG3				TRUE
14	100835999	100836272	M	other					TRUE
14	100900401	100901267	M	other					TRUE
14	100904519	100905081	M	other	MEG8				TRUE
14	101067986	101069282	M	other					TRUE
14	101072233	101073637	M	other					TRUE
14	101151414	101151997	P	other					TRUE
14	101275427	101278058	P	other		TRUE
14	101290524	101293978	P	other	MEG3	TRUE	TRUE
14	101370741	101371419	M	other		TRUE
14	101635099	101635431	P	other					TRUE
14	105830606	105830859	M	other	PACS2		TRUE
15	23364409	23364521	M	other					TRUE
15	23534531	23535315	P	other					TRUE
15	23606638	23609456	P	other					TRUE
15	23629039	23629213	M	other					TRUE
15	23634077	23634289	M	other					TRUE
15	23642878	23643103	M	other					TRUE
15	23647776	23648881	M	other	MAGEL2				TRUE
15	23661255	23662817	P	other					TRUE
15	23674115	23675360	P	other					TRUE
15	23686304	23688131	M	other	NDN				TRUE
15	23769176	23769945	P	other					TRUE
15	23782845	23783768	P	other					TRUE
15	23797680	23798290	M	other					TRUE
15	23807086	23812495	M	other		TRUE
15	23829311	23829706	P	other					TRUE
15	23854644	23855506	M	other					TRUE
15	23857016	23857880	M	other					TRUE
15	23858683	23861887	M	other					TRUE
15	23869240	23869921	M	other					TRUE
15	23877454	23878654	M	other					TRUE
15	23883075	23883432	P	other					TRUE
15	23892425	23894029	M	other		TRUE
15	23896280	23898594	M	other	PWRN4				TRUE
15	23908972	23909688	P	other					TRUE
15	23914065	23915807	P	other					TRUE
15	23922214	23923177	P	other					TRUE
15	23931257	23933138	P	other		TRUE			TRUE		Conflicting evidence for methylated allele: Court says mat, Zink says pat, Okae sperm vs oocyte methylation indicates pat.
15	23939735	23940870	P	other					TRUE
15	23967138	23967845	P	other					TRUE
15	23968767	23970583	P	other					TRUE
15	23971255	23971960	P	other					TRUE
15	23975861	23977507	P	other					TRUE
15	23984693	23986673	P	other					TRUE
15	23999391	24001886	P	other					TRUE
15	24004599	24005919	P	other					TRUE
15	24009020	24009903	P	other					TRUE
15	24019161	24019660	P	other					TRUE
15	24029218	24029630	P	other					TRUE
15	24050087	24051502	P	other					TRUE
15	24086139	24087500	P	other					TRUE
15	24101056	24101995	M	other	SNRPN				TRUE
15	24111944	24113625	P	other					TRUE
15	24115509	24117169	P	other					TRUE
15	24132683	24133507	P	other					TRUE
15	24156357	24157105	P	other					TRUE
15	24163134	24163879	P	other					TRUE
15	24174217	24175175	P	other					TRUE
15	24225156	24227501	P	other					TRUE
15	24239642	24241406	P	other					TRUE
15	24252735	24254128	P	other					TRUE
15	24274859	24275806	P	other					TRUE
15	24300755	24301849	P	other					TRUE
15	24346736	24347142	M	other		TRUE
15	24406235	24407327	P	other					TRUE
15	24416085	24417692	P	other					TRUE
15	24426478	24427389	M	other	SNRPN				TRUE
15	24535702	24537396	P	other					TRUE
15	24551067	24552042	P	other					TRUE
15	24552829	24553614	P	other					TRUE
15	24561446	24562639	P	other					TRUE
15	24566428	24567551	P	other					TRUE
15	24576113	24576926	P	other					TRUE
15	24578494	24579011	P	other					TRUE
15	24606385	24608581	P	other					TRUE
15	24648973	24649668	P	other					TRUE
15	24671872	24672679	M	other		TRUE
15	24689074	24690306	P	other					TRUE
15	24722753	24723071	M	other		TRUE
15	24733127	24735542	P	other					TRUE
15	24747566	24748890	P	other					TRUE
15	24768838	24769120	P	other					TRUE
15	24772760	24773758	M	other	SNRPN				TRUE
15	24784260	24785474	M	other					TRUE
15	24809111	24810320	P	other					TRUE
15	24816493	24817798	P	other					TRUE
15	24823417	24824759	M	other	SNRPN				TRUE
15	24828587	24829569	P	other					TRUE
15	24833609	24834203	P	other					TRUE
15	24846843	24848681	M	other	SNRPN				TRUE
15	24856474	24859220	M	other	SNRPN				TRUE
15	24877552	24880264	M	other	SNRPN				TRUE
15	24885960	24886572	P	other					TRUE
15	24887240	24888535	P	other					TRUE
15	24901543	24903906	P	other					TRUE
15	24910643	24911281	P	other					TRUE
15	24949168	24949368	P	other					TRUE
15	24954493	24957248	M	other	SNURF/SNRPN				TRUE
15	24996577	24998201	P	other					TRUE
15	25000817	25000975	P	other					TRUE
15	25005051	25005302	P	other					TRUE
15	25015223	25015809	P	other					TRUE
15	25017924	25018886	M	other		TRUE
15	25039354	25039564	P	other					TRUE
15	25048423	25049425	P	other					TRUE
15	25060537	25061269	P	other					TRUE
15	25062432	25064422	P	other					TRUE
15	25064951	25066060	P	other					TRUE
15	25066776	25067078	P	other					TRUE
15	25068564	25069481	M	other		TRUE
15	25075739	25076861	P	other	SNORD116-10,SNORD116-11,SNORD116-12,SNORD116-13,SNORD116-14,SNORD116-15,SNORD116-16,SNORD116-17,SNORD116-19,SNORD116-19,SNORD116-18,SNORD116-20,SNORD116-21,SNORD116-22,SNORD116-23,SNORD116-24				TRUE
15	25080754	25081544	P	other	SNORD116-10,SNORD116-11,SNORD116-12,SNORD116-13,SNORD116-14,SNORD116-15,SNORD116-16,SNORD116-17,SNORD116-19,SNORD116-19,SNORD116-18,SNORD116-20,SNORD116-21,SNORD116-22,SNORD116-23,SNORD116-24				TRUE
15	25083328	25085575	P	other	SNORD116-10,SNORD116-11,SNORD116-12,SNORD116-13,SNORD116-14,SNORD116-15,SNORD116-16,SNORD116-17,SNORD116-19,SNORD116-19,SNORD116-18,SNORD116-20,SNORD116-21,SNORD116-22,SNORD116-23,SNORD116-24				TRUE
15	25093008	25093829	M	other		TRUE
15	25123027	25123905	M	other		TRUE
15	25200004	25201976	M	other	SNURF/SNRPN	TRUE	TRUE
15	40486055	40486903	M	other					TRUE
15	45314789	45315642	M	placental-specific	SORD		TRUE
15	50909603	50909875	M	other					TRUE
15	76030565	76031591	M	other	DNM1P35		TRUE
15	79382548	79383980	M	placental-specific	RASGRF1		TRUE
15	93614758	93616859	M	placental-specific	RGMA	TRUE	TRUE
15	98865575	98867104	M	other	IGF1R				TRUE
15	99408496	99409650	M	other		TRUE
15	101626335	101626824	M	placental-specific	LRRK1		TRUE
16	806879	808764	M	other					TRUE
16	817075	818443	M	other					TRUE
16	863240	863884	M	placental-specific	PRR25		TRUE
16	3254405	3254770	P	other					TRUE
16	3364797	3366488	P	other	MTRNR2L4				TRUE
16	3413769	3414262	P	other					TRUE
16	3431450	3432387	M	other	ZNF597				TRUE
16	3434920	3435926	M	other					TRUE
16	3442978	3444462	P	other	ZNF597/NAA60/ZNF597,NAA60				TRUE
16	3481801	3482388	M	other		TRUE
16	3492724	3494463	P	other	ZNF597/NAA60	TRUE	TRUE
16	10707754	10708438	M	other					TRUE
16	30816719	30817779	M	placental-specific	ZNF629		TRUE			TRUE
16	48399731	48400475	M	placental-specific	SIAH1		TRUE
16	58534681	58535556	M	placental-specific	NDRG4		TRUE
16	66637919	66639593	M	placental-specific	CMTM3		TRUE
16	68572892	68573971	M	placental-specific	ZFP90		TRUE
16	74734230	74734885	M	other	MLKL		TRUE			TRUE
16	78079569	78080193	M	other	CLEC3A		TRUE
17	259426	260589	M	placental-specific	C17orf97		TRUE
17	409552	410094	M	other					TRUE
17	4900360	4902310	M	other					TRUE
17	56609082	56609687	M	placental-specific	2020-09-04		TRUE
17	66596155	66597643	M	placental-specific	FAM20A	TRUE	TRUE
18	32956510	32957683	M	placental-specific	ZNF396	TRUE	TRUE
18	47667786	47668339	M	other					TRUE
18	60051870	60052464	M	other	TNFRSF11A		TRUE
18	79899277	79899991	M	other					TRUE
18	80147168	80149255	M	other					TRUE
19	1324834	1325348	M	other	MUM1		TRUE
19	10303506	10306415	M	placental-specific	DNMT1	TRUE	TRUE
19	11784246	11785337	M	placental-specific	ZNF833P		TRUE
19	12075601	12076549	M	other	ZNF763		TRUE
19	13614882	13618186	M	placental-specific	CACNA1A			TRUE
19	17438249	17439339	M	other	ANO8		TRUE
19	21482472	21484491	M	other					TRUE
19	36266285	36266855	M	other					TRUE
19	38527504	38528578	M	other					TRUE
19	38543710	38544472	M	other					TRUE
19	53536955	53539153	M	other	ZNF331				TRUE
19	53553367	53555638	M	other	ZNF331				TRUE
19	54040510	54042212	M	other	ZNF331	TRUE	TRUE
19	54057086	54058425	M	other		TRUE
19	54150515	54155608	M	placental-specific	C19MC	TRUE	TRUE
19	56725960	56726738	M	other					TRUE
19	56829669	56829913	P	other					TRUE
19	56837802	56840915	M	other	PEG3				TRUE
19	56864809	56865037	M	other					TRUE
19	57348493	57353271	M	other	PEG3	TRUE	TRUE
19	58055058	58055675	P	other					TRUE
20	30134663	30135933	M	other	MCTS2P/HM13	TRUE	TRUE
20	30618874	30619244	M	placental-specific	C20orf160		TRUE
20	31547246	31548401	M	other	MCTS2P/HM13/HM13				TRUE
20	34638489	34639686	M	other	LINC00657		TRUE
20	36147042	36150528	M	other	BLCAP/NNAT	TRUE	TRUE
20	37519780	37521655	M	other	BLCAP/NNAT/BLCAP,NNAT				TRUE
20	42142005	42144040	M	other	L3MBTL1	TRUE	TRUE
20	43514638	43515399	M	other	L3MBTL/L3MBTL1				TRUE
20	48384392	48385349	M	other					TRUE
20	52789646	52791472	M	placental-specific	CYP24A1		TRUE			TRUE
20	57413694	57418612	P	other	GNAS	TRUE	TRUE
20	57425157	57428033	M	other	GNAS-AS1	TRUE	TRUE
20	57428905	57431463	M	other	GNAS XL	TRUE	TRUE
20	57463265	57465201	M	other		TRUE
20	58838984	58843556	P	other	GNAS/GNAS-AS1				TRUE
20	58846210	58846670	P	other					TRUE
20	58850116	58853207	M	other	NESP-AS/GNAS-AS1/GNAS-AS1,GNAS				TRUE
20	58854498	58856228	M	other	GNAS/GNAS-AS1,GNAS				TRUE
20	58888210	58889085	M	other	GNAS/LOC101927932,GNAS				TRUE
20	58889838	58890443	M	other	GNAS/LOC101927932,GNAS				TRUE
20	59526001	59526478	M	other					TRUE
20	60540388	60541082	M	placental-specific	TAF4		TRUE
20	63938417	63938769	M	other					TRUE
21	39385677	39386349	M	other	WRB				TRUE
21	39387837	39388701	M	other					TRUE
21	40757510	40758276	M	other		TRUE
21	42218551	42219853	M	placental-specific	TMPRSS3		TRUE			TRUE
21	46661264	46661774	M	other					TRUE
21	48087452	48088150	M	placental-specific	PRMT2		TRUE
22	19973978	19974866	M	placental-specific	ARVCF		TRUE
22	32026380	32026975	M	other	PISD		TRUE
22	37464839	37465279	M	placental-specific	KCTD17		TRUE
22	38412407	38412798	M	other					TRUE
22	40057496	40061223	M	placental-specific	CACNA1I			TRUE
22	41681734	41682868	M	other	NHP2L1/SNU13				TRUE
22	42077774	42078873	M	other	NHP2L1	TRUE	TRUE

## Sheet: s7_legend
chr	Chromosome
start	Start position
end	End position
methylated_allele	which parent of origin allele is the methylated allele
tissue_specificity	describes whether imprint is found only in placenta or is non-tissue specific
associated_gene	associated imprinted gene, taken from source
court	Is this imprint from Court et al 2014
hanna	Is this imprint from Hanna et al 2016
sanchez_delgado	Is this imprint from Sanchez-Delgado et al 2016
zink	Is this imprint from Zink et al 2018
hamada	Is this imprint from Hamada et al 2016
note	Some sort of comment

## Sheet: s8
Trimester	test	Tissue	estimate	p.value	p_value	p_value_adj	p_value_adj_label
Third	Alu	Trophoblasts cs	-0.0117235	0.00084	<0.001	0.0336012	0.034
Third	Alu	Stromal cs	-0.00516508	0.131304	0.131	1	>0.999
Third	Alu	Hofbauer cs	0.0696154	4.48e-35	<0.001	1.79e-33	<0.001
Third	Alu	Endothelial cs	0.0207889	2.36e-08	<0.001	9.43e-07	<0.001
Third	L1	Trophoblasts cs	-0.0144791	0.0016805	0.002	0.0672202	0.067
Third	L1	Stromal cs	0.0109213	0.0164964	0.016	0.659856	0.66
Third	L1	Hofbauer cs	0.0970748	6.75e-37	<0.001	2.7e-35	<0.001
Third	L1	Endothelial cs	-0.00338586	0.450629	0.451	1	>0.999
Third	REMP_Alu	Trophoblasts cs	0.00710247	0.141577	0.142	1	>0.999
Third	REMP_Alu	Stromal cs	0.0123476	0.0115689	0.012	0.462756	0.463
Third	REMP_Alu	Hofbauer cs	0.0495099	1.25e-16	<0.001	5e-15	<0.001
Third	REMP_Alu	Endothelial cs	0.0221681	1.24e-05	<0.001	0.000498	<0.001
Third	REMP_L1	Trophoblasts cs	0.000508	0.924899	0.925	1	>0.999
Third	REMP_L1	Stromal cs	0.0425323	6.48e-12	<0.001	2.59e-10	<0.001
Third	REMP_L1	Hofbauer cs	0.0896848	9.46e-29	<0.001	3.78e-27	<0.001
Third	REMP_L1	Endothelial cs	0.029647	3.34e-07	<0.001	1.34e-05	<0.001
Third	all_probes	Trophoblasts cs	-0.00761457	0.010968	0.011	0.43872	0.439
Third	all_probes	Stromal cs	-0.00961346	0.00148181	0.001	0.0592724	0.059
Third	all_probes	Hofbauer cs	0.0496159	3.63e-29	<0.001	1.45e-27	<0.001
Third	all_probes	Endothelial cs	-0.0160625	3.91e-07	<0.001	1.56e-05	<0.001
First	Alu	Trophoblasts cs	-0.0190449	0.184877	0.185	1	>0.999
First	Alu	Stromal cs	0.0413275	0.00195162	0.002	0.0780648	0.078
First	Alu	Hofbauer cs	0.101709	1.37e-06	<0.001	5.47e-05	<0.001
First	Alu	Endothelial cs	0.0626632	2.56e-05	<0.001	0.00102291	0.001
First	L1	Trophoblasts cs	-0.030821	0.140092	0.14	1	>0.999
First	L1	Stromal cs	0.0687587	0.000518	<0.001	0.0207215	0.021
First	L1	Hofbauer cs	0.143936	1.99e-06	<0.001	7.94e-05	<0.001
First	L1	Endothelial cs	0.0855743	5.57e-05	<0.001	0.00222899	0.002
First	REMP_Alu	Trophoblasts cs	-0.0125097	0.225436	0.225	1	>0.999
First	REMP_Alu	Stromal cs	0.0299786	0.00183695	0.002	0.0734782	0.073
First	REMP_Alu	Hofbauer cs	0.0767463	6.39e-07	<0.001	2.56e-05	<0.001
First	REMP_Alu	Endothelial cs	0.0472673	1.35e-05	<0.001	0.00054	<0.001
First	REMP_L1	Trophoblasts cs	-0.0337078	0.0363391	0.036	1	>0.999
First	REMP_L1	Stromal cs	0.0573872	0.000171	<0.001	0.00684386	0.007
First	REMP_L1	Hofbauer cs	0.125484	1.77e-07	<0.001	7.09e-06	<0.001
First	REMP_L1	Endothelial cs	0.0717158	1.35e-05	<0.001	0.000542	<0.001
First	all_probes	Trophoblasts cs	-0.0283173	0.0301032	0.03	1	>0.999
First	all_probes	Stromal cs	0.0326958	0.00482114	0.005	0.192846	0.193
First	all_probes	Hofbauer cs	0.0961799	4.45e-07	<0.001	1.78e-05	<0.001
First	all_probes	Endothelial cs	0.0494214	0.00011	<0.001	0.00441871	0.004

## Sheet: s8_legend
Trimester	What trimester of samples are being tested
test	Which set of CpGs are being tested (i.e. All, ALU, LINE1)
Tissue	Which tissue/celltype is being tested
estimate	The mean difference in DNA methylation
p.value	Raw p value
p_value	Raw p value rounded
p_value_adj	bonferroni adjust p value
p_value_adj_label	bonferroni adjust p value, rounded

## Sheet: s9
cpg	Trophoblasts	Stromal	Hofbauer	Endothelial	nRBC	Syncytiotrophoblast
cg01407254	0.131015	0.819863	0.969406	0.778577	0.978074	0.952331
cg18186478	0.109145	0.823367	0.893646	0.736273	0.90498	0.61543
cg15209369	0.163288	0.809891	0.925395	0.788308	0.893266	0.887935
cg01377268	0.0614957	0.770537	0.936131	0.677443	0.916802	0.190916
cg05059616	0.0732871	0.794358	0.928577	0.736847	0.944802	0.0816973
cg06884352	0.114826	0.761614	0.876693	0.698782	0.824504	0.848641
cg13561081	0.105803	0.715575	0.879785	0.784666	0.893405	0.529029
cg04901623	0.137757	0.716563	0.921602	0.780221	0.836505	0.800181
cg25834768	0.129927	0.761162	0.919748	0.434168	0.95908	0.966613
cg09268718	0.137504	0.725052	0.956661	0.875598	0.957136	0.218341
cg26033870	0.166546	0.821952	0.888996	0.769197	0.929711	0.651416
cg05241828	0.197041	0.698316	0.92363	0.800857	0.979255	0.904884
cg22377814	0.138286	0.772733	0.876085	0.588629	0.911889	0.880862
cg04452437	0.0617775	0.748609	0.922119	0.717119	0.834839	0.12113
cg19045070	0.205048	0.864014	0.922566	0.809692	0.90785	0.811016
cg27317046	0.0972326	0.596586	0.856787	0.542294	0.97382	0.816742
cg17455155	0.0904723	0.743444	0.948451	0.65636	0.870619	0.323929
cg01068601	0.0504375	0.417987	0.862817	0.64384	0.965058	0.534258
cg06775149	0.0900656	0.648974	0.884413	0.689509	0.862363	0.562044
cg14040131	0.0706403	0.686244	0.921818	0.636336	0.907248	0.255421
cg05484949	0.141386	0.672317	0.906393	0.717534	0.864994	0.845965
cg22906709	0.10492	0.753173	0.953664	0.722779	0.933408	0.127133
cg08000459	0.084947	0.793597	0.939893	0.662913	0.850988	0.186968
cg00033490	0.147039	0.847957	0.928835	0.808001	0.908807	0.251383
cg17826893	0.142854	0.816478	0.918488	0.693004	0.910868	0.478621
cg03778207	0.0719	0.68686	0.892118	0.571291	0.791014	0.627828
cg08866991	0.0898926	0.723081	0.950045	0.700153	0.901618	0.117089
cg04696274	0.214207	0.789756	0.936516	0.785327	0.958096	0.807709
cg04892766	0.0887118	0.698396	0.906111	0.72382	0.826629	0.330441
cg06506863	0.152134	0.733791	0.9158	0.653779	0.893754	0.743002
cg10501210	0.202008	0.926921	0.945429	0.903961	0.970032	0.15069
cg01644285	0.0578454	0.644009	0.884441	0.709316	0.882141	0.0680004
cg00319661	0.194916	0.868107	0.966213	0.786314	0.918691	0.477106
cg19831386	0.0799361	0.713382	0.861796	0.61615	0.893772	0.306778
cg01940181	0.120651	0.723328	0.961707	0.634391	0.925328	0.355265
cg15193215	0.0873767	0.749355	0.922192	0.74949	0.821911	0.108139
cg14557288	0.0635197	0.652731	0.936715	0.5608	0.910447	0.194257
cg05796838	0.069778	0.616888	0.829981	0.619316	0.979971	0.234641
cg22282764	0.126777	0.79953	0.933456	0.772559	0.841263	0.212767
cg24730892	0.0863313	0.712189	0.926868	0.652629	0.850465	0.214934
cg26089753	0.0965908	0.782681	0.920964	0.742666	0.791087	0.153414
cg13002506	0.106463	0.708532	0.726992	0.735897	0.867992	0.553994
cg04362790	0.198423	0.775447	0.94321	0.743241	0.878359	0.79648
cg04246253	0.156352	0.668669	0.862261	0.783526	0.821592	0.811875
cg19674178	0.141922	0.753524	0.887951	0.648982	0.834104	0.6994
cg00445591	0.142022	0.653215	0.887393	0.727391	0.826672	0.752615
cg00593773	0.132605	0.732418	0.932726	0.631946	0.915567	0.423292
cg07344019	0.109248	0.809355	0.898849	0.680431	0.850311	0.168418
cg06263178	0.0971416	0.646642	0.86447	0.652037	0.766569	0.652028
cg26003023	0.0815742	0.62689	0.904188	0.576912	0.839619	0.455612
cg21348406	0.932609	0.260508	0.115003	0.324859	0.0170512	0.850157
cg00661970	0.904762	0.156238	0.0693025	0.289472	0.0346336	0.907257
cg08086720	0.907827	0.19057	0.0996559	0.315848	0.0304802	0.914503
cg11841771	0.85008	0.164088	0.0741489	0.249474	0.0258664	0.869366
cg26385172	0.855774	0.179975	0.0710749	0.259717	0.0345318	0.869505
cg22230229	0.913823	0.218113	0.143075	0.364624	0.0796125	0.893305
cg21045464	0.828259	0.137482	0.0599763	0.211962	0.0278397	0.870193
cg16086559	0.872569	0.221404	0.0922686	0.287318	0.0340751	0.893961
cg00880290	0.776859	0.1019	0.0388973	0.122581	0.0171201	0.774935
cg23289079	0.867814	0.201102	0.113894	0.383117	0.121556	0.64723
cg25916282	0.822935	0.158957	0.0584518	0.361135	0.0324811	0.709402
cg02081006	0.771736	0.0952616	0.0650582	0.20338	0.054595	0.643224
cg08402365	0.781032	0.103556	0.0566627	0.176888	0.0346525	0.824364
cg27125044	0.768057	0.110531	0.0497641	0.165701	0.0254296	0.788062
cg03219968	0.810505	0.258823	0.0548014	0.320191	0.021197	0.730881
cg27520776	0.789346	0.237026	0.0712322	0.27411	0.0397276	0.745913
cg26402417	0.782748	0.327813	0.0666847	0.232311	0.0558675	0.574112
cg10159630	0.742102	0.1216	0.046158	0.303914	0.0242674	0.666455
cg25176746	0.819825	0.273105	0.139895	0.418137	0.0405927	0.713959
cg11692124	0.876549	0.247259	0.273513	0.339159	0.173628	0.860832
cg07695771	0.775762	0.275023	0.10976	0.344155	0.0405706	0.628834
cg10977770	0.782412	0.231575	0.144294	0.265898	0.0869284	0.748006
cg06123753	0.723422	0.234866	0.070625	0.322858	0.0918141	0.294824
cg19618622	0.680603	0.219883	0.0543204	0.108933	0.0950421	0.452637
cg12636169	0.759548	0.276986	0.110692	0.329129	0.0366667	0.662674
cg02564291	0.706229	0.140528	0.093023	0.271515	0.0379264	0.650044
cg16779839	0.710684	0.158928	0.0977607	0.20946	0.0820244	0.746794
cg00510718	0.749764	0.344799	0.118556	0.423769	0.0948102	0.317863
cg16668359	0.67049	0.154209	0.0800028	0.166255	0.0249852	0.671187
cg22377643	0.673485	0.209615	0.0856151	0.313175	0.0339841	0.344472
cg23856413	0.706233	0.171668	0.125647	0.26194	0.0484079	0.698512
cg23243267	0.808602	0.335134	0.215931	0.471383	0.0982825	0.650699
cg17428559	0.70119	0.209963	0.111578	0.326339	0.0474894	0.573022
cg00983697	0.71527	0.172537	0.22436	0.278848	0.125562	0.570952
cg13192155	0.821543	0.308973	0.358856	0.281344	0.256487	0.722879
cg21566177	0.719	0.392282	0.0899481	0.401984	0.0827919	0.343061
cg19203333	0.692482	0.321016	0.128139	0.272447	0.0532177	0.579759
cg10193681	0.578501	0.0744646	0.0604966	0.0999379	0.0639515	0.45295
cg10400081	0.643336	0.210794	0.0669569	0.261918	0.0436227	0.544125
cg04456219	0.629051	0.259101	0.0556696	0.375265	0.0693223	0.0996398
cg08202754	0.624294	0.205731	0.136968	0.243198	0.0674242	0.262479
cg27226320	0.625788	0.243705	0.0596137	0.365861	0.0321647	0.228389
cg18486235	0.641357	0.19206	0.103172	0.235626	0.0465504	0.58002
cg03723247	0.597976	0.0887796	0.0559169	0.170193	0.049195	0.608778
cg18249580	0.559158	0.0742557	0.0239849	0.173233	0.0252262	0.42571
cg25324047	0.628996	0.259006	0.0683047	0.321596	0.036529	0.328064
cg11551464	0.711745	0.398141	0.311217	0.339557	0.0696738	0.25305
cg18566515	0.684287	0.144649	0.170565	0.262179	0.338162	0.278728
cg11800620	0.646483	0.236976	0.0711991	0.315365	0.0523873	0.50206
cg00223681	0.680704	0.22565	0.147856	0.396431	0.109627	0.409672
cg21228424	0.669401	0.205322	0.727693	0.645531	0.685463	0.959616
cg06261059	0.70346	0.276305	0.877249	0.826169	0.626942	0.853856
cg15264020	0.875195	0.379636	0.819291	0.877652	0.708801	0.946418
cg21081729	0.758252	0.271689	0.748619	0.645552	0.664147	0.857298
cg12363903	0.898648	0.385613	0.683521	0.755778	0.885288	0.949607
cg18837542	0.933215	0.470712	0.889089	0.858723	0.928849	0.92241
cg25936876	0.75397	0.317764	0.852412	0.837612	0.546549	0.857617
cg16553083	0.855634	0.497227	0.933169	0.945393	0.928735	0.967788
cg27423627	0.776458	0.272776	0.699842	0.551772	0.639469	0.880724
cg15854548	0.8643	0.425857	0.815501	0.803133	0.867764	0.870518
cg26635451	0.725762	0.324303	0.738355	0.679992	0.724836	0.866606
cg09701743	0.915345	0.428304	0.842528	0.769096	0.789968	0.918907
cg18165707	0.923428	0.452318	0.894057	0.914983	0.670796	0.943882
cg06231385	0.751265	0.404617	0.887892	0.653738	0.844165	0.899323
cg23507796	0.909531	0.456882	0.899844	0.908786	0.691193	0.917241
cg14190344	0.816407	0.472821	0.876525	0.796275	0.916353	0.907676
cg16560824	0.92235	0.490169	0.93317	0.910892	0.729256	0.954618
cg12712747	0.848985	0.505204	0.89073	0.896345	0.932089	0.85732
cg15255390	0.884869	0.491719	0.893937	0.792085	0.896855	0.935797
cg23266869	0.86633	0.495449	0.876638	0.835696	0.939985	0.844665
cg12741572	0.864229	0.408633	0.745176	0.757078	0.750284	0.893121
cg25560775	0.810276	0.423785	0.841508	0.742653	0.789685	0.880729
cg24952240	0.811945	0.433589	0.815085	0.852957	0.736423	0.921257
cg12778065	0.854643	0.49437	0.897872	0.881222	0.870535	0.87211
cg23216101	0.916705	0.467774	0.90073	0.774515	0.755684	0.927926
cg18912160	0.686199	0.313961	0.766386	0.696133	0.56764	0.775114
cg15338159	0.779577	0.458104	0.81127	0.774503	0.934101	0.809613
cg04133132	0.929024	0.537662	0.901032	0.887864	0.907234	0.916123
cg23181482	0.770607	0.413907	0.820064	0.8045	0.685879	0.912071
cg05689208	0.7777	0.474223	0.883136	0.800123	0.877637	0.879828
cg00211625	0.894248	0.545276	0.90401	0.889159	0.938096	0.941856
cg14326472	0.794388	0.463063	0.86776	0.758325	0.864633	0.860378
cg26310429	0.954533	0.592148	0.935961	0.939356	0.979197	0.95748
cg10063663	0.883436	0.515044	0.886378	0.809181	0.896843	0.915464
cg15188398	0.937015	0.582215	0.945888	0.928232	0.939967	0.974834
cg01729125	0.869523	0.468572	0.701821	0.878433	0.828589	0.891028
cg14155831	0.872027	0.475967	0.845155	0.819226	0.789923	0.880511
cg16210719	0.768227	0.44011	0.852787	0.687604	0.802404	0.952471
cg26937943	0.832175	0.469481	0.84807	0.844728	0.817525	0.780826
cg10209089	0.593182	0.339754	0.804801	0.650579	0.678434	0.816869
cg03413253	0.801703	0.439559	0.816759	0.794009	0.748182	0.858019
cg04848693	0.718434	0.443402	0.85249	0.713547	0.879181	0.827111
cg06912227	0.906295	0.539297	0.889508	0.907339	0.873476	0.909308
cg24741744	0.82871	0.414739	0.664526	0.777346	0.756371	0.873378
cg03536961	0.814334	0.474808	0.898407	0.866411	0.715722	0.923263
cg10415570	0.842343	0.50194	0.881994	0.807947	0.865714	0.904313
cg18001443	0.882514	0.498836	0.847312	0.875507	0.800647	0.876242
cg20925383	0.655663	0.439779	0.734475	0.733422	0.931381	0.946125
cg07127957	0.768683	0.466349	0.844259	0.816036	0.828607	0.850373
cg09164726	0.823925	0.48548	0.859308	0.820715	0.870593	0.786889
cg21435684	0.134747	0.621987	0.0970179	0.188315	0.0312636	0.312196
cg18278184	0.200148	0.618621	0.129018	0.298297	0.0628814	0.0961207
cg26542660	0.27618	0.652542	0.160011	0.290409	0.0927406	0.199635
cg05471169	0.229623	0.615644	0.0994822	0.329393	0.0256464	0.305849
cg27170268	0.306947	0.697952	0.279383	0.212736	0.441179	0.134041
cg02684104	0.159414	0.568699	0.229953	0.234143	0.0610617	0.308673
cg18757155	0.357188	0.548163	0.0867856	0.269263	0.157794	0.122645
cg18760837	0.103668	0.458273	0.176881	0.194387	0.0201043	0.171801
cg13424302	0.25097	0.568588	0.13683	0.272977	0.219334	0.365813
cg06460328	0.157677	0.521974	0.127456	0.21808	0.262387	0.185192
cg18533201	0.0600012	0.425419	0.11739	0.166253	0.0141915	0.196058
cg19448318	0.172911	0.488828	0.197278	0.259168	0.044705	0.188983
cg01641792	0.0515782	0.379914	0.0903471	0.0684586	0.0217321	0.0656725
cg02140579	0.325019	0.721832	0.481121	0.39161	0.460667	0.268335
cg06029700	0.108155	0.47115	0.139645	0.18672	0.183708	0.128351
cg10615591	0.169682	0.402868	0.0633454	0.108087	0.0620228	0.0351535
cg12593223	0.139858	0.426963	0.0860819	0.206356	0.0211254	0.176486
cg00474889	0.0786973	0.430084	0.0693635	0.283453	0.093955	0.0694477
cg05579652	0.0561505	0.373197	0.0699327	0.0911279	0.0727513	0.112028
cg27208307	0.149205	0.391261	0.0635494	0.19689	0.0242562	0.0414719
cg24865623	0.0605661	0.368069	0.11296	0.12522	0.0409454	0.0499863
cg25924694	0.079879	0.397332	0.12261	0.16174	0.0796402	0.111097
cg02928476	0.0615997	0.390629	0.089827	0.272361	0.0309567	0.0560913
cg23444610	0.187451	0.500877	0.304759	0.215349	0.167598	0.209629
cg14825976	0.0480143	0.39317	0.150053	0.0988419	0.149809	0.065336
cg03196720	0.0677426	0.399255	0.11336	0.135853	0.151881	0.0770929
cg08766256	0.108731	0.468563	0.243929	0.123367	0.293802	0.101328
cg16300030	0.286548	0.536248	0.332713	0.271206	0.183494	0.235233
cg09164580	0.0927791	0.378279	0.128883	0.141971	0.0353055	0.171918
cg17534029	0.140488	0.338043	0.052592	0.0987104	0.0170975	0.0308106
cg16236263	0.285462	0.495203	0.338968	0.253169	0.11788	0.112319
cg10522770	0.183054	0.493943	0.277754	0.313834	0.119722	0.292585
cg02449461	0.289397	0.452322	0.12898	0.195039	0.148402	0.180554
cg10364115	0.163573	0.421432	0.22586	0.141219	0.109226	0.160742
cg22568403	0.10203	0.350666	0.0669116	0.174092	0.0330553	0.0640786
cg00547103	0.264856	0.565825	0.36219	0.290537	0.354561	0.184082
cg12198140	0.0610181	0.351605	0.0441549	0.132985	0.0560612	0.243625
cg26857315	0.0702758	0.352671	0.0663952	0.267465	0.0248397	0.0433989
cg12270368	0.0732929	0.339051	0.118099	0.087543	0.0555995	0.093783
cg23449544	0.237373	0.508399	0.284721	0.282011	0.286077	0.157822
cg20092046	0.176708	0.414333	0.165597	0.31688	0.0595276	0.111076
cg05225883	0.455317	0.624099	0.439484	0.381792	0.306161	0.287225
cg19783626	0.0545936	0.304387	0.0565251	0.122443	0.0276483	0.0299451
cg01942845	0.0459046	0.359657	0.0880543	0.150387	0.102636	0.268942
cg17186066	0.0645615	0.349692	0.126104	0.183253	0.0599192	0.120879
cg00074365	0.129599	0.388189	0.0987724	0.126703	0.221344	0.140429
cg16959787	0.185624	0.359081	0.0818756	0.133687	0.0552569	0.178101
cg14739437	0.117457	0.354212	0.130882	0.139494	0.0839987	0.104936
cg17725477	0.0365221	0.308537	0.0704718	0.159665	0.0315339	0.0571912
cg01557792	0.131	0.366241	0.0544723	0.150043	0.145728	0.183436
cg11597902	0.953112	0.89481	0.127512	0.947821	0.919636	0.959288
cg06125903	0.950288	0.943817	0.135511	0.949563	0.878288	0.95549
cg15310871	0.937737	0.924263	0.160504	0.935212	0.962486	0.939124
cg03663120	0.965154	0.942022	0.17847	0.965063	0.936026	0.963023
cg24788483	0.953664	0.942547	0.149768	0.941628	0.849096	0.953599
cg10480329	0.915329	0.879767	0.140455	0.888115	0.942719	0.940403
cg20610950	0.936817	0.921441	0.167584	0.94257	0.932507	0.946582
cg05923857	0.966204	0.946565	0.171618	0.931912	0.873708	0.968475
cg04756491	0.901615	0.802976	0.121382	0.919906	0.867522	0.909306
cg11186858	0.965082	0.933642	0.202844	0.95757	0.936594	0.957634
cg11231069	0.975519	0.957122	0.214045	0.980065	0.911557	0.983424
cg03313271	0.931111	0.925603	0.178905	0.933675	0.889071	0.940844
cg22666015	0.880012	0.829018	0.109177	0.92276	0.746464	0.928701
cg13980609	0.920698	0.894721	0.122941	0.918263	0.68129	0.923556
cg18835472	0.914145	0.891559	0.161305	0.899853	0.84035	0.926359
cg12655112	0.94143	0.941648	0.175803	0.921729	0.797486	0.960947
cg09977847	0.850289	0.872339	0.145114	0.908961	0.841061	0.907537
cg18563860	0.856367	0.896855	0.151727	0.919326	0.823452	0.921164
cg25344401	0.936456	0.908572	0.17277	0.930869	0.815821	0.921808
cg16636767	0.915675	0.912066	0.196719	0.910508	0.907836	0.922924
cg15235987	0.865608	0.905414	0.155695	0.903528	0.804591	0.897097
cg05584070	0.904903	0.899656	0.171157	0.90729	0.808468	0.913512
cg08428868	0.90746	0.886635	0.16928	0.904166	0.808769	0.908396
cg02182476	0.923325	0.890377	0.163231	0.925439	0.736628	0.937032
cg12422199	0.864356	0.802856	0.151947	0.867684	0.862857	0.885741
cg15068842	0.836512	0.788782	0.135181	0.899209	0.79405	0.906185
cg00091349	0.883912	0.866157	0.1429	0.885768	0.720789	0.923031
cg18107006	0.858939	0.817586	0.101853	0.620225	0.833605	0.906201
cg00828556	0.807242	0.865486	0.14005	0.959058	0.753236	0.794017
cg04605532	0.893935	0.86706	0.169909	0.888735	0.840304	0.817463
cg10207609	0.942698	0.88717	0.138374	0.530832	0.898784	0.937471
cg06373940	0.912417	0.895556	0.195557	0.929922	0.810832	0.936935
cg17356733	0.691879	0.721015	0.0841143	0.882799	0.852461	0.681071
cg17086773	0.878572	0.864938	0.181783	0.888609	0.856803	0.900713
cg02041484	0.903618	0.889026	0.170236	0.912477	0.737449	0.922076
cg23146741	0.895591	0.842206	0.128436	0.62101	0.855194	0.914246
cg09322573	0.895676	0.895824	0.186405	0.910927	0.793223	0.926262
cg22900266	0.919033	0.855881	0.179557	0.938633	0.737723	0.962052
cg22675702	0.725605	0.811667	0.132903	0.836046	0.910317	0.777252
cg24597363	0.633118	0.605479	0.0608374	0.794796	0.851406	0.894615
cg24637417	0.855655	0.867665	0.138882	0.879724	0.678306	0.912596
cg14851700	0.861441	0.839328	0.116978	0.788701	0.74441	0.768101
cg09140723	0.896054	0.803421	0.155744	0.890465	0.752058	0.899249
cg01722297	0.930057	0.904673	0.217646	0.924541	0.832111	0.935201
cg23666117	0.913438	0.90555	0.18257	0.923739	0.709619	0.929654
cg10499974	0.885633	0.795697	0.124703	0.847788	0.655977	0.933444
cg14134003	0.917215	0.892628	0.169562	0.909047	0.672942	0.917964
cg17183174	0.869005	0.813639	0.143724	0.902767	0.678411	0.921259
cg02889869	0.915849	0.89966	0.188932	0.916557	0.73433	0.91947
cg10838410	0.894352	0.843197	0.155011	0.901794	0.686094	0.898411
cg09994756	0.0496562	0.273372	0.818616	0.104761	0.346185	0.0479008
cg23822407	0.113153	0.207502	0.838246	0.0744458	0.310473	0.496336
cg08426898	0.0745876	0.130238	0.803917	0.244821	0.347354	0.0912269
cg13870494	0.0721907	0.139819	0.741568	0.190524	0.156336	0.0758143
cg05576619	0.0336256	0.115961	0.744592	0.0706763	0.359707	0.0389799
cg24134182	0.0600225	0.26016	0.830471	0.213341	0.437671	0.0455939
cg19884556	0.0464019	0.064345	0.684618	0.0912305	0.156573	0.0557788
cg03601886	0.0433916	0.137911	0.821294	0.447938	0.285329	0.181587
cg14140118	0.099747	0.138215	0.794335	0.170632	0.272385	0.396065
cg20460166	0.0371046	0.143879	0.7113	0.0706493	0.247446	0.0332704
cg16934235	0.168345	0.155383	0.791305	0.242694	0.252864	0.200473
cg27423838	0.0942258	0.191222	0.784368	0.20578	0.269405	0.290239
cg15911409	0.163064	0.170129	0.801344	0.187641	0.195552	0.559703
cg27100370	0.0811419	0.140226	0.779135	0.099891	0.520583	0.0528696
cg09832911	0.168331	0.297315	0.840166	0.160367	0.416047	0.268838
cg25911551	0.387759	0.168045	0.830433	0.323967	0.271362	0.0727891
cg02126477	0.146597	0.193865	0.816045	0.161281	0.296408	0.578961
cg16871561	0.211754	0.191625	0.784378	0.394242	0.180183	0.035529
cg09371112	0.152513	0.185941	0.748927	0.159446	0.281585	0.101688
cg27328431	0.0758215	0.47485	0.845694	0.371644	0.329232	0.0696811
cg16002660	0.033259	0.221199	0.752329	0.155499	0.414667	0.0384037
cg10312522	0.120525	0.202756	0.752587	0.178089	0.304762	0.126965
cg14057303	0.0579452	0.0917097	0.707198	0.265005	0.201042	0.137221
cg24859236	0.0559544	0.183434	0.76245	0.0673597	0.535492	0.0716661
cg01258949	0.0635209	0.289907	0.857548	0.595888	0.373718	0.128743
cg13904968	0.0584484	0.252687	0.811742	0.587866	0.248655	0.110347
cg22594214	0.116861	0.223971	0.754246	0.230175	0.284351	0.134461
cg13935577	0.101295	0.474186	0.799469	0.209891	0.189613	0.384363
cg07059925	0.0506179	0.135456	0.678629	0.107307	0.254639	0.093625
cg07226481	0.455577	0.314555	0.834336	0.298276	0.212152	0.160366
cg15913157	0.249171	0.440515	0.836063	0.318301	0.297555	0.0967658
cg15488596	0.41131	0.274145	0.84769	0.400082	0.308254	0.0533027
cg00246969	0.0692712	0.16356	0.734423	0.0954779	0.347981	0.365923
cg03299329	0.227272	0.394606	0.856531	0.206476	0.549076	0.0749278
cg04462561	0.312189	0.143127	0.826928	0.410473	0.24349	0.425899
cg20343063	0.195403	0.235818	0.788738	0.428136	0.245493	0.106047
cg19653282	0.332771	0.183489	0.775663	0.253249	0.291022	0.0680571
cg07702311	0.106502	0.241205	0.843529	0.635817	0.307246	0.250982
cg26929272	0.0650737	0.269287	0.720518	0.148271	0.331283	0.0561852
cg17408185	0.122514	0.205058	0.812933	0.399944	0.429022	0.196664
cg00344445	0.0338748	0.0885551	0.692259	0.436565	0.168042	0.043964
cg11688410	0.281601	0.139302	0.71805	0.196834	0.197565	0.105897
cg08404225	0.110211	0.121453	0.709519	0.246961	0.311005	0.0457877
cg21650243	0.0434602	0.0992201	0.637308	0.0637236	0.229665	0.0974648
cg10593028	0.305332	0.530592	0.905156	0.350749	0.270772	0.555455
cg19043798	0.0852152	0.144391	0.766723	0.53128	0.199371	0.307872
cg24202817	0.184113	0.175233	0.804815	0.568472	0.315547	0.0800406
cg22354175	0.148538	0.288331	0.765979	0.313643	0.224879	0.265456
cg20282814	0.193926	0.419919	0.855914	0.33367	0.494091	0.116174
cg07332880	0.0655999	0.0883112	0.64032	0.114611	0.234295	0.0688141
cg13501446	0.603572	0.916232	0.961251	0.208836	0.954488	0.934077
cg23670372	0.353933	0.783928	0.923429	0.150444	0.873253	0.9355
cg03452625	0.791494	0.74363	0.906366	0.228486	0.869202	0.923032
cg12711755	0.779706	0.83153	0.891794	0.234103	0.839867	0.92201
cg07297896	0.629137	0.81799	0.936795	0.177114	0.936651	0.326505
cg21821308	0.495733	0.698167	0.961171	0.192058	0.895201	0.957219
cg08368520	0.35585	0.743918	0.873525	0.142598	0.85282	0.896556
cg24766041	0.476843	0.651087	0.758642	0.125391	0.930422	0.723974
cg27177779	0.958875	0.878158	0.944287	0.339406	0.92611	0.955691
cg14636575	0.656701	0.766069	0.916441	0.253181	0.937579	0.954203
cg13589218	0.691931	0.649704	0.827983	0.214262	0.955203	0.841256
cg07532353	0.518128	0.691023	0.958132	0.227995	0.942615	0.943992
cg11841704	0.657517	0.633446	0.898232	0.188151	0.94399	0.555511
cg08081346	0.758814	0.823401	0.892119	0.287329	0.90925	0.881665
cg15938260	0.805624	0.945362	0.964964	0.351041	0.952876	0.849805
cg07076109	0.480204	0.83206	0.937846	0.248502	0.89012	0.93601
cg26209730	0.918772	0.773823	0.799184	0.293602	0.875209	0.905706
cg03286774	0.835158	0.813025	0.571906	0.2392	0.872574	0.874887
cg02643580	0.489902	0.644902	0.908262	0.213162	0.902439	0.900916
cg19576422	0.35567	0.627454	0.799311	0.139563	0.819484	0.864782
cg21496803	0.939401	0.971091	0.980183	0.409135	0.927841	0.942187
cg23830290	0.940189	0.812992	0.771954	0.347305	0.956768	0.94487
cg25946646	0.488755	0.491886	0.888823	0.170284	0.804905	0.913996
cg12483545	0.849957	0.902306	0.947928	0.386508	0.966931	0.914209
cg07784293	0.525302	0.83418	0.922679	0.253942	0.784766	0.921572
cg13654884	0.636275	0.658096	0.733246	0.222546	0.864521	0.905634
cg03396152	0.513069	0.587757	0.890795	0.205176	0.837859	0.874025
cg23101649	0.706098	0.628887	0.94771	0.239781	0.71879	0.899973
cg25463749	0.560642	0.760651	0.858319	0.231014	0.826545	0.731621
cg14534089	0.919284	0.922009	0.956792	0.415063	0.940641	0.946862
cg27065717	0.543829	0.574919	0.907443	0.234081	0.87263	0.901596
cg12337011	0.54833	0.862596	0.829147	0.279132	0.862671	0.918123
cg16345114	0.893167	0.902148	0.879902	0.394093	0.941472	0.944183
cg00945443	0.465917	0.708575	0.889693	0.224184	0.798931	0.886692
cg09177577	0.628244	0.777283	0.824563	0.290541	0.926966	0.843182
cg11011736	0.532058	0.600911	0.867284	0.239322	0.904604	0.84879
cg04400131	0.440602	0.776375	0.887769	0.261362	0.884397	0.881673
cg09444818	0.443374	0.817514	0.854523	0.255201	0.832511	0.906048
cg24759654	0.671655	0.834573	0.912881	0.338001	0.915373	0.888829
cg06287775	0.686993	0.742426	0.861377	0.277835	0.772513	0.900105
cg02013841	0.802561	0.798072	0.762736	0.310282	0.845954	0.876136
cg13799838	0.820305	0.695306	0.889968	0.326906	0.87522	0.876532
cg10908116	0.59517	0.494062	0.840969	0.198277	0.749646	0.8992
cg11862001	0.533141	0.67392	0.89734	0.245142	0.88049	0.691147
cg00593243	0.680699	0.874272	0.933528	0.363446	0.93075	0.904896
cg17378966	0.571354	0.843864	0.912995	0.302072	0.913761	0.70291
cg06579465	0.456697	0.835061	0.917095	0.292334	0.879424	0.89779
cg17972213	0.862598	0.749561	0.886564	0.324743	0.779314	0.869695
cg24938752	0.973814	0.957566	0.958074	0.472515	0.972701	0.971485
cg22911687	0.432111	0.591888	0.883982	0.202944	0.779045	0.831757
cg04855216	0.560171	0.256033	0.0742225	0.83833	0.0839904	0.079066
cg09455881	0.41336	0.274276	0.0439913	0.810892	0.116101	0.310566
cg17344048	0.244243	0.359639	0.0687127	0.761663	0.139054	0.193833
cg24452821	0.47284	0.234313	0.049444	0.732483	0.0254247	0.0622839
cg07493197	0.081539	0.246768	0.0477481	0.681975	0.193052	0.0531766
cg21878746	0.394966	0.396944	0.0764119	0.79623	0.0545571	0.493646
cg01515802	0.416121	0.431034	0.0874379	0.791004	0.0656365	0.33797
cg07310406	0.542733	0.247456	0.149972	0.79913	0.0811398	0.381286
cg02930667	0.0498374	0.16097	0.0490854	0.642829	0.248786	0.0665232
cg08305799	0.0783612	0.297592	0.0549415	0.621499	0.0379962	0.0496458
cg21427956	0.106138	0.183153	0.137126	0.639058	0.146679	0.124164
cg17684207	0.0530401	0.0796525	0.0934783	0.571918	0.0817774	0.0533435
cg25541653	0.360897	0.251663	0.0756994	0.688131	0.122562	0.145847
cg25941751	0.479891	0.535945	0.269514	0.841426	0.270501	0.0746695
cg07244095	0.108205	0.501446	0.117517	0.668147	0.0536114	0.0933812
cg18910298	0.161806	0.406519	0.0867076	0.668989	0.108036	0.112771
cg18413706	0.3336	0.183417	0.0565217	0.636424	0.0323333	0.1534
cg09934056	0.0352953	0.116743	0.0729055	0.563133	0.0338807	0.171769
cg23929284	0.0221107	0.0457629	0.0682649	0.524206	0.0185836	0.0387924
cg13565499	0.353661	0.545182	0.104139	0.798365	0.346922	0.117252
cg13974464	0.0225616	0.0719011	0.199335	0.594317	0.170449	0.0398409
cg27019030	0.268579	0.446687	0.0819038	0.708558	0.14649	0.187432
cg06385583	0.0813926	0.208177	0.073263	0.599188	0.122662	0.0869569
cg14447606	0.0208072	0.0253299	0.0291981	0.510973	0.0245209	0.102967
cg13572892	0.313098	0.447312	0.205859	0.735364	0.0584794	0.35804
cg24458609	0.0728428	0.0982776	0.0809907	0.555485	0.0537798	0.114765
cg24338833	0.106824	0.0872353	0.0999226	0.568417	0.0648896	0.129788
cg07330288	0.190936	0.315503	0.0907081	0.682814	0.0748152	0.546845
cg12097883	0.0802437	0.0626347	0.0439336	0.539018	0.0224102	0.182474
cg04221117	0.321997	0.373557	0.187779	0.705132	0.0834092	0.245353
cg20824939	0.2593	0.31031	0.18738	0.698329	0.0613968	0.481586
cg18752527	0.234851	0.167442	0.0574298	0.61523	0.0846027	0.269006
cg23888440	0.214155	0.387186	0.333427	0.696635	0.0765159	0.14711
cg17406359	0.0835795	0.26523	0.0332606	0.586876	0.139546	0.0645367
cg20935363	0.113642	0.136031	0.131318	0.571389	0.0481212	0.144595
cg05861567	0.328553	0.274136	0.0475731	0.623515	0.0335426	0.156466
cg19440734	0.468546	0.377885	0.052461	0.704703	0.0960101	0.278451
cg09682183	0.467466	0.399554	0.122671	0.721823	0.153647	0.138281
cg01334831	0.135167	0.374049	0.0744439	0.646798	0.213035	0.149179
cg11674130	0.369409	0.276898	0.0671625	0.633992	0.0388148	0.209331
cg21842920	0.164636	0.507877	0.0982361	0.694584	0.142773	0.40572
cg05479618	0.385645	0.262046	0.0538372	0.620844	0.0688392	0.0806218
cg20951255	0.22772	0.466985	0.11692	0.683086	0.188507	0.166945
cg14571813	0.230594	0.291207	0.112591	0.610284	0.0680299	0.130386
cg00907842	0.19257	0.254083	0.0444191	0.670483	0.446781	0.0879767
cg03717588	0.0578633	0.0895983	0.0630281	0.506611	0.0529801	0.0657273
cg16963852	0.128094	0.261495	0.405202	0.654279	0.144827	0.110569
cg00901051	0.157706	0.122003	0.107984	0.592236	0.104121	0.402195
cg22446709	0.0329791	0.0520822	0.0769318	0.486879	0.0510696	0.0378184
cg20968743	0.0584685	0.0857903	0.0338323	0.506566	0.0447755	0.194178
cg07116712	0.911307	0.939602	0.725427	0.969356	0.0274043	0.982714
cg10576280	0.784342	0.782867	0.957663	0.815843	0.0526587	0.959158
cg25574765	0.97495	0.768994	0.46718	0.970252	0.0252236	0.975223
cg17518965	0.961891	0.731735	0.537701	0.897214	0.0129838	0.949672
cg01681367	0.925864	0.707651	0.52659	0.929805	0.0151527	0.964106
cg14083015	0.948983	0.833224	0.565275	0.865944	0.0456095	0.952209
cg22136363	0.975053	0.898965	0.612514	0.974744	0.10978	0.982756
cg00446123	0.97141	0.835985	0.875494	0.980411	0.158046	0.980717
cg24301930	0.985005	0.880406	0.345033	0.822036	0.0257855	0.980233
cg18723409	0.968676	0.884237	0.512309	0.969671	0.092024	0.971316
cg16087093	0.844424	0.788362	0.406431	0.967227	0.0195347	0.966873
cg12192582	0.941464	0.813658	0.423431	0.919289	0.0373477	0.940296
cg20181887	0.928823	0.893167	0.526935	0.866955	0.0672142	0.972257
cg20784693	0.920541	0.72549	0.747443	0.902151	0.0874617	0.975312
cg18440839	0.978742	0.611217	0.418322	0.963754	0.0187078	0.981164
cg25666403	0.944896	0.847128	0.239599	0.941006	0.0180369	0.956335
cg27284288	0.920645	0.750919	0.509216	0.947531	0.0593135	0.957929
cg26769700	0.907106	0.793917	0.517299	0.939667	0.0674952	0.961625
cg09897970	0.938169	0.744622	0.329269	0.931611	0.0235447	0.973997
cg21201401	0.952618	0.81388	0.748513	0.962615	0.142325	0.971854
cg19252956	0.9162	0.873671	0.390035	0.920333	0.0542304	0.925594
cg27125093	0.782467	0.790177	0.570848	0.877469	0.0351584	0.880846
cg08578703	0.8968	0.748834	0.567086	0.79352	0.0389743	0.931157
cg02349669	0.839372	0.81537	0.846524	0.84903	0.108212	0.867661
cg20513976	0.960608	0.891645	0.883731	0.960819	0.197359	0.963045
cg13408086	0.955522	0.845795	0.184224	0.975989	0.0385493	0.955291
cg03052794	0.789074	0.77409	0.672314	0.917511	0.0356826	0.584606
cg20098854	0.907326	0.76487	0.319711	0.958203	0.028511	0.886671
cg26247093	0.894925	0.883135	0.453972	0.945865	0.0868525	0.949276
cg19108747	0.94759	0.805628	0.568734	0.528687	0.0175888	0.970237
cg09370867	0.946813	0.871464	0.334688	0.853638	0.0501207	0.942844
cg00903584	0.877715	0.686094	0.44048	0.916871	0.0349275	0.950931
cg12283393	0.929673	0.75027	0.301692	0.898086	0.0232496	0.917113
cg09344348	0.952257	0.772502	0.200618	0.971077	0.032487	0.94734
cg17006136	0.954662	0.687767	0.269216	0.911756	0.0188128	0.960997
cg09050670	0.912952	0.893714	0.421402	0.81784	0.0731007	0.970025
cg24706505	0.882976	0.792739	0.557501	0.897255	0.0849559	0.896649
cg15982099	0.966749	0.8338	0.263308	0.968374	0.0736623	0.97601
cg15391590	0.914974	0.819848	0.471289	0.844843	0.076777	0.942735
cg00713294	0.895386	0.725063	0.49825	0.891696	0.0660966	0.918325
cg26769927	0.945354	0.62048	0.316855	0.933596	0.0296251	0.965729
cg08480068	0.954517	0.600953	0.260779	0.934395	0.0170546	0.977697
cg00240653	0.858242	0.752541	0.443333	0.896698	0.0497492	0.877118
cg07380416	0.898955	0.676437	0.366006	0.903545	0.0344776	0.937459
cg22210337	0.86202	0.729687	0.311408	0.932093	0.0173541	0.802495
cg03167633	0.896985	0.730825	0.699539	0.645349	0.0678957	0.910173
cg21465176	0.943821	0.709072	0.300556	0.890361	0.0438597	0.944728
cg18384097	0.89958	0.796155	0.499994	0.916667	0.103543	0.927946
cg27626141	0.73077	0.732732	0.732996	0.722615	0.0356114	0.7186
cg15536947	0.889119	0.765155	0.818256	0.841998	0.151476	0.942625
cg10095954	0.027532	0.0909793	0.361147	0.0257064	0.959257	0.0250955
cg02792168	0.0353406	0.0655778	0.265476	0.0297252	0.924803	0.280004
cg22434923	0.0481632	0.361974	0.0644387	0.114129	0.925523	0.0389113
cg08846870	0.0207515	0.177424	0.498135	0.120085	0.965493	0.0343348
cg18356785	0.0629706	0.193972	0.532231	0.048613	0.967694	0.0359112
cg26256263	0.040918	0.244126	0.441818	0.0703978	0.953923	0.0195387
cg25139229	0.0286982	0.243264	0.598428	0.0591934	0.975749	0.0344891
cg20918393	0.0295258	0.202426	0.086436	0.0552092	0.896478	0.468961
cg12050271	0.0502678	0.10809	0.401938	0.0235972	0.904964	0.181821
cg18856478	0.0243078	0.21567	0.611374	0.101367	0.956612	0.0294348
cg19811337	0.040058	0.116263	0.537244	0.0502663	0.90356	0.0512236
cg06482498	0.0640275	0.10203	0.419905	0.0696686	0.87638	0.0530411
cg04798016	0.050318	0.261289	0.580602	0.14792	0.972697	0.153569
cg10783294	0.0480671	0.221814	0.495982	0.115153	0.946192	0.223487
cg20806180	0.0281958	0.13406	0.610056	0.0472038	0.908927	0.0387765
cg01657186	0.0479973	0.162309	0.479464	0.0767631	0.899262	0.081136
cg16402452	0.0600747	0.193036	0.504113	0.0592138	0.902812	0.057258
cg07795766	0.161233	0.33494	0.31986	0.153946	0.945587	0.15491
cg25170017	0.0264729	0.16165	0.660111	0.0367504	0.905777	0.026802
cg01089914	0.0393219	0.25906	0.672437	0.0602813	0.941401	0.0593696
cg19458020	0.0167289	0.19607	0.541037	0.0295508	0.880092	0.0215348
cg24006721	0.039897	0.216056	0.439551	0.0679682	0.876886	0.0501932
cg02190353	0.0519593	0.36668	0.0725227	0.0976518	0.835773	0.0513962
cg22575498	0.12675	0.248698	0.504071	0.219058	0.943239	0.0297302
cg09074856	0.0623107	0.2161	0.55002	0.0458337	0.912764	0.211994
cg20061654	0.145623	0.318575	0.408865	0.152145	0.941574	0.18179
cg08169020	0.0181757	0.107535	0.216635	0.0176493	0.776293	0.0243645
cg07996594	0.0841983	0.164205	0.396144	0.0471089	0.869888	0.194958
cg04600000	0.0384331	0.139516	0.286188	0.131233	0.831077	0.0534998
cg09125300	0.0504168	0.142779	0.487626	0.0319652	0.876689	0.218472
cg22871947	0.0427084	0.220722	0.759956	0.15251	0.956475	0.0455226
cg21935981	0.128929	0.265599	0.355409	0.111064	0.903307	0.187794
cg22507723	0.0363473	0.214276	0.500449	0.0397292	0.881506	0.137264
cg17316649	0.0152939	0.0451239	0.247331	0.0179259	0.76545	0.051826
cg14032089	0.0459408	0.34139	0.407343	0.176663	0.91204	0.0926479
cg17601191	0.0673184	0.511749	0.154977	0.330332	0.926091	0.0408569
cg08732300	0.0349834	0.193263	0.689604	0.173188	0.930578	0.0299433
cg24757533	0.0125765	0.230017	0.427791	0.0315664	0.843106	0.0290419
cg22653140	0.0565958	0.0969621	0.311438	0.0645714	0.824099	0.196855
cg15000222	0.0299626	0.34515	0.675585	0.0713603	0.931532	0.0351575
cg07776993	0.0679215	0.304661	0.697653	0.26635	0.974458	0.0242045
cg03577139	0.026147	0.16252	0.611208	0.0636327	0.870675	0.0319097
cg25923345	0.0209953	0.186529	0.585201	0.0479973	0.870125	0.0702878
cg07904475	0.274984	0.155349	0.479918	0.247683	0.935436	0.0468601
cg16775752	0.0375639	0.358082	0.764883	0.195122	0.981011	0.0658305
cg11372436	0.0735292	0.146911	0.568389	0.0744339	0.87274	0.065891
cg00513941	0.0720111	0.195732	0.733753	0.0914315	0.924588	0.0902446
cg10506844	0.173899	0.307114	0.573084	0.199058	0.958885	0.0889017
cg22876699	0.169426	0.113852	0.230569	0.12307	0.826625	0.113946
cg13737221	0.0677366	0.419426	0.602953	0.118348	0.956658	0.161752
cg19022006	0.60951	0.898019	0.948044	0.894233	0.961884	0.0677966
cg11862144	0.566592	0.892756	0.945887	0.887249	0.964733	0.0604421
cg08887707	0.615511	0.878271	0.951164	0.892832	0.955996	0.0788723
cg27089352	0.557357	0.894715	0.945571	0.885321	0.953297	0.0706485
cg19548524	0.651669	0.91665	0.94811	0.9153	0.939286	0.0980637
cg07295775	0.657076	0.923109	0.931832	0.903903	0.964404	0.110954
cg12646067	0.611968	0.925287	0.9592	0.914897	0.957071	0.108717
cg09610311	0.670204	0.812507	0.923899	0.923775	0.865513	0.0735868
cg21474351	0.560537	0.881072	0.920206	0.880522	0.928613	0.0726734
cg19711602	0.612894	0.94045	0.967271	0.915444	0.96421	0.118153
cg20821842	0.622386	0.797526	0.739489	0.870763	0.948436	0.0381971
cg03098644	0.481104	0.855217	0.910492	0.839211	0.934544	0.0508075
cg08622675	0.616557	0.934311	0.968343	0.911378	0.970251	0.126666
cg23892310	0.556552	0.905289	0.949833	0.897305	0.921164	0.093395
cg03710196	0.636708	0.940906	0.968117	0.945714	0.9574	0.137827
cg26845390	0.764958	0.919437	0.947602	0.884274	0.936803	0.139828
cg13241681	0.616676	0.788367	0.950347	0.90306	0.967857	0.0983676
cg04924555	0.588668	0.888944	0.922044	0.872056	0.927807	0.091676
cg16769976	0.63019	0.875232	0.929106	0.863788	0.861599	0.0850136
cg16765600	0.543395	0.868063	0.924115	0.870345	0.92801	0.0830808
cg12656653	0.596978	0.929049	0.948268	0.905064	0.979412	0.130119
cg25504605	0.807118	0.93695	0.951975	0.934156	0.95921	0.173453
cg19752861	0.612664	0.876645	0.939462	0.902876	0.939191	0.112642
cg11436025	0.532788	0.856438	0.943599	0.873787	0.959053	0.0943409
cg05141014	0.596227	0.89274	0.956025	0.830779	0.915132	0.0977517
cg26314566	0.543691	0.893057	0.948373	0.892446	0.982431	0.113849
cg18183817	0.625031	0.882956	0.962059	0.848185	0.929704	0.110087
cg25259564	0.525785	0.850968	0.953683	0.871593	0.936075	0.0896477
cg05883978	0.670852	0.940891	0.968121	0.944769	0.915944	0.147419
cg04329088	0.570729	0.889861	0.936902	0.865342	0.914439	0.0971559
cg07019638	0.518833	0.863896	0.930881	0.867235	0.971981	0.0963985
cg04904609	0.579037	0.725893	0.920541	0.904657	0.899209	0.0704763
cg26247168	0.52734	0.870819	0.955396	0.879163	0.908668	0.0923723
cg00498816	0.606821	0.892828	0.953579	0.85471	0.910141	0.108416
cg20553577	0.80814	0.938653	0.899319	0.929381	0.885153	0.15418
cg08322289	0.592299	0.78161	0.929816	0.791411	0.937329	0.0748607
cg09634659	0.594163	0.88667	0.959141	0.79101	0.907275	0.0941979
cg10652674	0.562561	0.892655	0.923739	0.872573	0.905179	0.0991396
cg11944110	0.51235	0.875277	0.943839	0.85376	0.891565	0.0850567
cg09495645	0.762123	0.787734	0.902915	0.895654	0.91233	0.121682
cg05848579	0.517605	0.866661	0.925198	0.842318	0.951049	0.0933909
cg14250737	0.577844	0.890787	0.939522	0.890193	0.929864	0.116977
cg07049352	0.595835	0.903445	0.941577	0.901204	0.947205	0.129422
cg24730157	0.505453	0.860793	0.924362	0.837963	0.960265	0.0923626
cg03871104	0.554609	0.895139	0.951551	0.880948	0.95151	0.120556
cg14642259	0.476947	0.849975	0.917629	0.823769	0.975203	0.0851443
cg20122645	0.550748	0.896083	0.914514	0.8773	0.933141	0.108146
cg10198568	0.518726	0.898997	0.942172	0.853875	0.948889	0.107085
cg08498247	0.540733	0.819201	0.909421	0.839164	0.933641	0.0840141
cg24511458	0.525278	0.882892	0.919902	0.871306	0.901051	0.0942339
cg21887193	0.145962	0.0846067	0.0512305	0.0589004	0.0440422	0.935394
cg24922129	0.177655	0.0919223	0.0534918	0.0812821	0.0376622	0.93409
cg02454890	0.201449	0.0415818	0.0370262	0.0417507	0.033917	0.914562
cg23892626	0.148614	0.0482287	0.0343223	0.0748958	0.042431	0.909633
cg24181771	0.0834629	0.0442763	0.0336321	0.0435856	0.0312864	0.887302
cg20281962	0.257982	0.049124	0.0423585	0.0521032	0.0284771	0.922154
cg09276315	0.129329	0.0327073	0.0279279	0.0478721	0.0274235	0.883705
cg01680010	0.0951335	0.0669949	0.0402052	0.0602014	0.0750911	0.896694
cg22169990	0.336715	0.137117	0.0418232	0.0787537	0.0487833	0.951913
cg08711175	0.168518	0.0489707	0.0341215	0.0612628	0.0597099	0.89674
cg05310764	0.0391275	0.0278708	0.0270162	0.0325389	0.0234913	0.850266
cg03470207	0.0726124	0.0434554	0.0419562	0.0475614	0.0483216	0.868722
cg04602387	0.0497304	0.0239562	0.0195394	0.0939689	0.0361797	0.86185
cg13899718	0.146978	0.0456506	0.0585601	0.104445	0.0311543	0.892239
cg27636310	0.381496	0.0661713	0.0502805	0.0770249	0.0206273	0.931518
cg16876647	0.355684	0.0884214	0.077641	0.149472	0.0312617	0.951188
cg26104083	0.301517	0.0492769	0.036435	0.212947	0.0315413	0.934453
cg12060422	0.296725	0.0539691	0.0467741	0.262943	0.0257841	0.942786
cg18261205	0.143023	0.0734149	0.0554477	0.0813132	0.0275298	0.883987
cg08727535	0.150254	0.0487728	0.038737	0.0567836	0.0214778	0.864268
cg16417447	0.290154	0.0662659	0.0418955	0.0656702	0.0358262	0.893196
cg22221669	0.303239	0.048586	0.0468699	0.0701256	0.0331004	0.892476
cg12934884	0.263564	0.087573	0.0775117	0.0816461	0.0491516	0.903701
cg17754510	0.433673	0.0725959	0.0550499	0.0797879	0.0343116	0.922549
cg22235821	0.368953	0.0562481	0.0368979	0.0916494	0.0359565	0.90618
cg25819602	0.186196	0.163262	0.0754922	0.179605	0.0258143	0.913439
cg01853276	0.123401	0.0540589	0.044992	0.0744466	0.041654	0.858174
cg21229570	0.332764	0.0862048	0.0440631	0.0596444	0.0295136	0.898384
cg13070763	0.140959	0.0893781	0.0322092	0.0676164	0.0291987	0.861434
cg11433622	0.403188	0.074974	0.0560533	0.0988587	0.0199807	0.917177
cg00968638	0.309673	0.0848368	0.0468978	0.11132	0.027985	0.90196
cg07109923	0.179516	0.0665745	0.0471069	0.0598727	0.0514939	0.867863
cg11154552	0.199182	0.116878	0.082711	0.112471	0.0681926	0.901929
cg18512515	0.106998	0.0731171	0.130557	0.0704472	0.0649773	0.876098
cg21210224	0.218429	0.041786	0.0298956	0.0513748	0.0199965	0.85753
cg16178603	0.422736	0.0739615	0.0451754	0.0841439	0.0174022	0.91135
cg17919186	0.219102	0.0889949	0.0493003	0.0772633	0.0312028	0.877132
cg25783550	0.129763	0.0801593	0.1145	0.0837052	0.0973205	0.887218
cg11863717	0.24758	0.0941425	0.0868371	0.0987958	0.0444925	0.896126
cg05040501	0.173416	0.0895941	0.0638425	0.0918045	0.0326557	0.872169
cg14890578	0.354536	0.0668718	0.0494731	0.0702244	0.0418656	0.897721
cg07813142	0.344384	0.116015	0.0630316	0.112352	0.0358405	0.914137
cg12737152	0.149154	0.0657817	0.0416538	0.0935982	0.0286399	0.857725
cg26190890	0.128957	0.0418814	0.0277572	0.0509525	0.0560668	0.844774
cg23346544	0.198009	0.0599566	0.0732072	0.0957825	0.0650208	0.880782
cg18612647	0.0842126	0.0386244	0.0382933	0.0455524	0.0413668	0.832736
cg00436496	0.420497	0.0899183	0.048494	0.258313	0.0280166	0.94645
cg24452128	0.449017	0.0886718	0.058207	0.0944147	0.0352586	0.923751
cg05947699	0.131728	0.1625	0.0447171	0.120537	0.0513474	0.882309
cg00778807	0.391142	0.0954731	0.058438	0.0934651	0.0484534	0.915572

## Sheet: s10
cpg	Trophoblasts	Stromal	Hofbauer	Endothelial	nRBC	Syncytiotrophoblast
cg10590657	0.10141	0.93458	0.865529	0.896364	0.844838	0.0546044
cg14923398	0.128203	0.890211	0.903677	0.938364	0.950871	0.0538319
cg05348366	0.13057	0.951982	0.880308	0.906514	0.927806	0.0654673
cg17907628	0.121525	0.927878	0.872784	0.891441	0.91436	0.0532523
cg26799656	0.125995	0.948201	0.880386	0.8791	0.901042	0.0682398
cg11862144	0.156199	0.943085	0.911497	0.934167	0.964733	0.0604421
cg11552829	0.14365	0.878379	0.929398	0.944605	0.949094	0.0447919
cg05059616	0.162314	0.959669	0.918034	0.938432	0.944802	0.0816973
cg16156113	0.132055	0.929913	0.894977	0.925532	0.86128	0.034963
cg00281273	0.0719336	0.908696	0.835017	0.847663	0.71167	0.0253137
cg24702147	0.139898	0.921167	0.832691	0.924333	0.953132	0.0616246
cg11108115	0.159895	0.94215	0.880352	0.907692	0.973585	0.0635887
cg25259564	0.183893	0.965928	0.929387	0.941743	0.936075	0.0896477
cg11724557	0.180521	0.956925	0.915801	0.941249	0.968651	0.0545724
cg00942241	0.170456	0.951567	0.916895	0.927967	0.918223	0.0763029
cg16277139	0.183193	0.947001	0.920483	0.948033	0.965193	0.085777
cg03098644	0.139067	0.917362	0.863468	0.887779	0.934544	0.0508075
cg19022006	0.174269	0.93356	0.919713	0.927187	0.961884	0.0677966
cg07213482	0.255242	0.979803	0.950947	0.967718	0.958988	0.80562
cg02180979	0.100865	0.873118	0.815793	0.811922	0.954989	0.070143
cg21952119	0.153653	0.923175	0.89967	0.917544	0.887323	0.0618813
cg12406879	0.15669	0.95125	0.894759	0.853628	0.932297	0.0845538
cg16068038	0.121567	0.792032	0.87054	0.873778	0.959574	0.122641
cg10652674	0.178258	0.951716	0.911019	0.926577	0.905179	0.0991396
cg11944110	0.186332	0.966509	0.926174	0.933833	0.891565	0.0850567
cg24730157	0.198556	0.96945	0.922806	0.918133	0.960265	0.0923626
cg09450200	0.204297	0.95933	0.924312	0.934838	0.94542	0.148338
cg00180684	0.127239	0.808438	0.866858	0.867847	0.927889	0.0590568
cg25964180	0.133946	0.886747	0.893488	0.796219	0.897896	0.0736457
cg03221366	0.206994	0.943157	0.929329	0.927863	0.929049	0.212929
cg16765600	0.165222	0.885805	0.900475	0.886397	0.92801	0.0830808
cg27628891	0.187754	0.917183	0.902983	0.90813	0.964962	0.111336
cg23873415	0.193177	0.949256	0.908541	0.905285	0.939261	0.0970824
cg08398691	0.117447	0.90627	0.833977	0.81674	0.803965	0.0693561
cg21344537	0.176964	0.921407	0.886112	0.903371	0.877097	0.173993
cg18362281	0.192192	0.94119	0.887455	0.922365	0.948115	0.0863055
cg12053296	0.155418	0.913173	0.829441	0.877483	0.925256	0.0938157
cg05898123	0.13386	0.898159	0.840338	0.848177	0.861785	0.0434208
cg03102386	0.157312	0.921117	0.893054	0.914611	0.753788	0.0765271
cg11436025	0.215232	0.959694	0.930226	0.933827	0.959053	0.0943409
cg14795528	0.196332	0.944736	0.900697	0.906509	0.932304	0.143079
cg18183817	0.20854	0.919071	0.943179	0.944857	0.929704	0.110087
cg08840441	0.173253	0.932661	0.857856	0.920493	0.879335	0.0687207
cg13473894	0.211798	0.963947	0.894805	0.930263	0.956542	0.138587
cg22800400	0.196187	0.936842	0.895934	0.920257	0.755796	0.47896
cg07724259	0.17604	0.899241	0.887258	0.889431	0.930032	0.0889661
cg03347739	0.218035	0.903032	0.926186	0.908968	0.937091	0.44402
cg26314566	0.241792	0.97996	0.940522	0.966729	0.982431	0.113849
cg04111078	0.20469	0.931704	0.923218	0.944869	0.88847	0.100878
cg02263377	0.101076	0.768357	0.877869	0.786025	0.856288	0.0412846
cg03953626	0.903732	0.110841	0.171015	0.125663	0.0173753	0.965083
cg06833110	0.836108	0.0437018	0.10507	0.087797	0.0217768	0.945194
cg22169990	0.823537	0.0387202	0.0912777	0.0548678	0.0487833	0.951913
cg18586886	0.826547	0.0569561	0.100266	0.0660525	0.0174949	0.942189
cg18430555	0.875324	0.185265	0.0891888	0.138647	0.0574464	0.958965
cg03190219	0.826311	0.0392459	0.13932	0.0714394	0.0284567	0.941062
cg00765705	0.84235	0.0726437	0.109474	0.0808821	0.118483	0.945291
cg07813142	0.83682	0.0566702	0.135542	0.115263	0.0358405	0.914137
cg02017926	0.832187	0.0894679	0.124705	0.0786653	0.0261358	0.933994
cg21629500	0.799962	0.042822	0.0748431	0.0760371	0.0268835	0.913822
cg08382226	0.815707	0.0564705	0.113762	0.0729005	0.0462957	0.919965
cg27005749	0.793514	0.0292454	0.0897504	0.0547956	0.0353285	0.911197
cg15474402	0.80612	0.0402186	0.101097	0.0513052	0.0839806	0.929763
cg01545587	0.80059	0.0482347	0.0952081	0.059175	0.036819	0.915171
cg10380328	0.798862	0.0823575	0.0590821	0.0555145	0.0324687	0.923384
cg23663774	0.791656	0.0368994	0.0859699	0.053076	0.0311248	0.907461
cg26017930	0.833021	0.0788629	0.166057	0.0792193	0.0411643	0.941413
cg08957069	0.911034	0.319335	0.158447	0.144139	0.0447358	0.96782
cg03140412	0.795197	0.0346292	0.0899418	0.0649657	0.0422361	0.925676
cg10828660	0.802423	0.0588265	0.0982498	0.0536795	0.0507054	0.941619
cg07211212	0.782584	0.0298981	0.0835118	0.0445612	0.0265996	0.914683
cg12749132	0.792859	0.0387173	0.0879221	0.0668036	0.0307874	0.928499
cg27260772	0.804228	0.063109	0.0946532	0.088031	0.0417125	0.878556
cg01665555	0.806108	0.0630085	0.110384	0.0729776	0.0323443	0.931278
cg03896589	0.825596	0.138275	0.098601	0.0778539	0.0667072	0.898545
cg00587009	0.826791	0.100315	0.107857	0.0912254	0.089036	0.929988
cg16629469	0.804628	0.0641151	0.102033	0.0750976	0.0598441	0.917598
cg03712541	0.817863	0.0511106	0.143334	0.120419	0.0222545	0.918938
cg01791371	0.78682	0.0382015	0.0920074	0.065836	0.0301007	0.913725
cg18232722	0.84767	0.0743653	0.215373	0.103954	0.0733692	0.960922
cg08887400	0.778249	0.0355124	0.086633	0.0531479	0.0247958	0.892107
cg02454890	0.775308	0.0364692	0.075524	0.0509909	0.033917	0.914562
cg25371919	0.774051	0.0697317	0.058452	0.0372656	0.0248245	0.908622
cg09462924	0.796166	0.0381617	0.13229	0.0830061	0.0223485	0.902783
cg22399133	0.839433	0.119067	0.155206	0.136687	0.0327282	0.928212
cg04021697	0.777291	0.0353982	0.0945411	0.0578815	0.0285564	0.897383
cg22619763	0.816205	0.083574	0.12424	0.0948917	0.0727433	0.9361
cg21766898	0.811726	0.0790762	0.129746	0.0955593	0.047751	0.920156
cg08086720	0.803607	0.121235	0.103125	0.0605158	0.0304802	0.914503
cg05398903	0.785688	0.0963882	0.0784422	0.048153	0.0268817	0.899064
cg13547268	0.809444	0.0618944	0.139375	0.11188	0.0245686	0.918948
cg06888746	0.820844	0.216856	0.0748396	0.0528093	0.0375736	0.946654
cg11433622	0.765181	0.0324901	0.0779789	0.0463871	0.0199807	0.917177
cg10967023	0.815332	0.184195	0.0817836	0.0700025	0.0300931	0.950726
cg26615127	0.791849	0.0544876	0.121184	0.0937617	0.039704	0.841646
cg10958362	0.832539	0.114665	0.125321	0.156429	0.0547087	0.924506
cg13916459	0.772682	0.0424265	0.0699678	0.0521381	0.0619366	0.921403
cg25947619	0.761751	0.0315985	0.0729385	0.0399547	0.0357712	0.896427
cg18465484	0.802469	0.0602349	0.124003	0.0964403	0.0533171	0.934884
cg05224741	0.758565	0.0322446	0.0609368	0.0429557	0.0233719	0.909062
cg07538039	0.884906	0.0720044	0.961658	0.909838	0.93646	0.953247
cg05956452	0.800572	0.0486755	0.945065	0.898181	0.960268	0.922521
cg05588903	0.826839	0.05044	0.943477	0.890422	0.919621	0.952183
cg02242345	0.890883	0.092333	0.967557	0.94567	0.931339	0.959664
cg25670583	0.797316	0.046755	0.929985	0.891598	0.945756	0.918386
cg02666566	0.881579	0.0958222	0.961128	0.935112	0.969978	0.958534
cg17947992	0.843931	0.0818239	0.953747	0.916753	0.956304	0.947211
cg21926619	0.89184	0.096002	0.954736	0.886702	0.971798	0.965438
cg18837542	0.779873	0.0466018	0.927014	0.85872	0.928849	0.92241
cg22109796	0.852598	0.0716976	0.932444	0.902454	0.871505	0.93068
cg04133132	0.822661	0.0679334	0.922155	0.908179	0.907234	0.916123
cg18065686	0.818672	0.0543163	0.907961	0.86727	0.91831	0.897337
cg13121428	0.824843	0.0713164	0.923222	0.896366	0.932062	0.923091
cg13042918	0.862807	0.0966956	0.958697	0.907336	0.938337	0.954434
cg26975184	0.903688	0.120553	0.96037	0.939522	0.93089	0.964687
cg00283857	0.823341	0.0797324	0.930213	0.893133	0.946996	0.928794
cg22684370	0.841949	0.0886324	0.93122	0.907777	0.94104	0.933588
cg18576301	0.829601	0.0637189	0.915965	0.832248	0.925055	0.917643
cg08201451	0.844216	0.0933442	0.93572	0.923103	0.883485	0.943086
cg07866001	0.839588	0.0718119	0.90999	0.876538	0.881449	0.919502
cg21497060	0.856396	0.079305	0.924942	0.871661	0.884616	0.916639
cg24250374	0.862683	0.104701	0.940104	0.927196	0.914513	0.91615
cg14588738	0.833544	0.0694003	0.920296	0.876025	0.862027	0.891255
cg02400009	0.829742	0.100367	0.937181	0.926825	0.931905	0.933691
cg24338920	0.851567	0.0633422	0.930628	0.889548	0.720662	0.929507
cg08006672	0.819445	0.0681158	0.833329	0.889431	0.974699	0.931378
cg00211625	0.825739	0.053573	0.942045	0.736843	0.938096	0.941856
cg07132086	0.843255	0.0866049	0.932049	0.896187	0.865547	0.932427
cg02299195	0.851145	0.0829398	0.942863	0.831573	0.919323	0.932335
cg21132587	0.88766	0.0951161	0.901725	0.896419	0.889769	0.92853
cg10782206	0.801185	0.0655212	0.9011	0.873937	0.904026	0.880998
cg16985233	0.856928	0.0823847	0.931322	0.87843	0.840136	0.896972
cg18002126	0.712587	0.0554123	0.913823	0.865641	0.946855	0.908272
cg27308218	0.86145	0.0900256	0.922762	0.88183	0.86399	0.914161
cg09215588	0.818065	0.078236	0.914861	0.895621	0.844701	0.917025
cg01198391	0.842548	0.0858681	0.926949	0.880636	0.846106	0.931483
cg00819233	0.770022	0.0717113	0.925145	0.877303	0.914909	0.852134
cg27450867	0.768208	0.0669177	0.905639	0.861335	0.928767	0.893317
cg17343184	0.864757	0.0766861	0.868682	0.90928	0.792801	0.922629
cg23968866	0.85143	0.0845791	0.920938	0.824642	0.922373	0.916596
cg05194636	0.777912	0.050437	0.921638	0.862559	0.756741	0.907341
cg15925869	0.836817	0.0895829	0.889179	0.899998	0.907399	0.904445
cg20778600	0.867878	0.099742	0.926097	0.914379	0.81869	0.922844
cg02895699	0.820266	0.0752829	0.896789	0.867862	0.877494	0.897534
cg07393854	0.766268	0.0660922	0.922018	0.874401	0.880448	0.831078
cg25241662	0.841823	0.066786	0.92533	0.864391	0.722862	0.915178
cg11692403	0.809066	0.052399	0.911254	0.842499	0.753437	0.897332
cg10063663	0.827561	0.0861179	0.921271	0.853852	0.896843	0.915464
cg07351758	0.843545	0.0836753	0.935781	0.830424	0.8706	0.909477
cg09534872	0.827371	0.0604135	0.916731	0.762209	0.892633	0.913906
cg16366262	0.166484	0.912077	0.090224	0.0798457	0.0482061	0.0779933
cg02721000	0.189233	0.916128	0.083819	0.128981	0.095145	0.0877482
cg13044675	0.245405	0.955402	0.0922437	0.247399	0.0395662	0.0989576
cg01641792	0.186554	0.891788	0.0633394	0.117942	0.0217321	0.0656725
cg21361094	0.159216	0.921079	0.0587817	0.241893	0.017319	0.184854
cg03892838	0.164474	0.894182	0.0532114	0.136838	0.107616	0.122319
cg16179938	0.228317	0.904749	0.0851957	0.100665	0.0670401	0.144882
cg06381803	0.138928	0.857336	0.0637167	0.0644227	0.0475772	0.0666793
cg05857996	0.264063	0.95167	0.105572	0.20541	0.0789684	0.232692
cg18759102	0.317197	0.902214	0.0531874	0.0641003	0.0233818	0.299119
cg18069290	0.248406	0.93175	0.10992	0.231905	0.0176551	0.171009
cg25356504	0.149824	0.889117	0.209243	0.0754939	0.0634328	0.0471179
cg22844229	0.154414	0.859975	0.0689979	0.1202	0.0208298	0.0793464
cg01529365	0.134125	0.836043	0.0409024	0.0794199	0.0215101	0.0725966
cg11566394	0.253885	0.919377	0.12059	0.168059	0.048187	0.198874
cg14494721	0.277576	0.931243	0.124139	0.232508	0.0169549	0.179727
cg03728296	0.252409	0.923325	0.131463	0.218062	0.0425543	0.131039
cg15843262	0.162043	0.849827	0.0937127	0.0842613	0.0182227	0.129902
cg04963424	0.224424	0.891445	0.102273	0.174086	0.0166585	0.144029
cg08052226	0.196925	0.868597	0.0944783	0.112347	0.0807882	0.106476
cg26279021	0.303006	0.892136	0.0650967	0.0934178	0.0388931	0.413123
cg00764796	0.238997	0.89773	0.118092	0.154095	0.134433	0.119736
cg24183324	0.109408	0.817639	0.0564356	0.114369	0.0395197	0.0463149
cg27457284	0.13919	0.844464	0.0617149	0.191809	0.0304227	0.0598539
cg05825244	0.284088	0.966522	0.142933	0.410136	0.0204991	0.200603
cg12390895	0.186132	0.840442	0.0769294	0.112998	0.0422388	0.0839198
cg16754678	0.16286	0.862749	0.111275	0.183772	0.0645003	0.107822
cg06943912	0.435838	0.932631	0.092955	0.0977391	0.254423	0.0987174
cg18403361	0.401515	0.896224	0.0840595	0.116312	0.0367619	0.227898
cg02925367	0.304205	0.886414	0.0445747	0.220426	0.0256669	0.258217
cg09988738	0.372554	0.903869	0.0989177	0.144625	0.0430264	0.308705
cg09275704	0.20502	0.849854	0.0969306	0.14683	0.0448998	0.163629
cg06668065	0.338035	0.960085	0.0953734	0.421806	0.0361211	0.267106
cg13340765	0.460252	0.916082	0.0367097	0.0571794	0.0312565	0.779595
cg26089877	0.274862	0.945289	0.174258	0.381828	0.0313151	0.161729
cg13247398	0.176056	0.853447	0.0911114	0.110828	0.0842021	0.437746
cg20116828	0.429588	0.938301	0.104171	0.213442	0.0280212	0.397584
cg17097782	0.215104	0.854649	0.0585349	0.213985	0.0197193	0.21701
cg26100986	0.165386	0.896537	0.0756267	0.433022	0.0339484	0.100507
cg00218447	0.252264	0.844524	0.073805	0.143065	0.0254475	0.154752
cg04904385	0.238372	0.821171	0.0380964	0.0695312	0.0242438	0.295404
cg06631310	0.0845592	0.782845	0.0517734	0.0869257	0.0933219	0.0583536
cg21127735	0.262712	0.87418	0.116799	0.202472	0.0308655	0.172044
cg14683380	0.279551	0.925297	0.188439	0.306219	0.0437696	0.17267
cg11064034	0.340686	0.895809	0.0703995	0.19743	0.0460331	0.370814
cg15415259	0.177832	0.902985	0.270423	0.185439	0.203216	0.086012
cg11430077	0.17938	0.890376	0.356412	0.126172	0.0819168	0.0830585
cg06088745	0.201093	0.809972	0.0607843	0.10595	0.0531059	0.118888
cg12765064	0.238741	0.954289	0.205493	0.455333	0.101943	0.101375
cg00700412	0.281886	0.887456	0.21164	0.0964524	0.128706	0.270295
cg03663120	0.958592	0.96506	0.12625	0.963252	0.936026	0.963023
cg06125903	0.933655	0.950942	0.102843	0.924679	0.878288	0.95549
cg24788483	0.93943	0.955023	0.111256	0.946	0.849096	0.953599
cg15310871	0.917599	0.92366	0.112184	0.936075	0.962486	0.939124
cg05923857	0.947264	0.968233	0.144764	0.944576	0.873708	0.968475
cg23755933	0.931811	0.951227	0.149897	0.951743	0.942914	0.951598
cg12655112	0.940193	0.957582	0.131656	0.931702	0.797486	0.960947
cg13980609	0.91592	0.909478	0.0947071	0.92632	0.68129	0.923556
cg10480329	0.924214	0.886691	0.131792	0.906901	0.942719	0.940403
cg22503106	0.945198	0.971675	0.178069	0.965891	0.937872	0.956365
cg00828556	0.838525	0.966385	0.114185	0.967005	0.753236	0.794017
cg16429499	0.885162	0.942185	0.120144	0.93357	0.765266	0.881206
cg03313271	0.926364	0.940369	0.154281	0.923872	0.889071	0.940844
cg22900266	0.940909	0.958578	0.153755	0.952676	0.737723	0.962052
cg03727754	0.831695	0.956596	0.117868	0.952786	0.79231	0.717956
cg05584070	0.907522	0.91534	0.137028	0.910712	0.808468	0.913512
cg18563860	0.908973	0.931835	0.145079	0.911332	0.823452	0.921164
cg16636767	0.896948	0.928251	0.155662	0.913111	0.907836	0.922924
cg15235987	0.890625	0.911011	0.130898	0.905687	0.804591	0.897097
cg09977847	0.882917	0.895829	0.124727	0.878554	0.841061	0.907537
cg22666015	0.902304	0.797589	0.104169	0.922901	0.746464	0.928701
cg23403750	0.88773	0.919999	0.139438	0.905254	0.86455	0.835989
cg02182476	0.917902	0.918674	0.140626	0.925494	0.736628	0.937032
cg24448340	0.909279	0.930543	0.121233	0.931755	0.605374	0.905845
cg11231069	0.962824	0.975659	0.212197	0.974897	0.911557	0.983424
cg08428868	0.894795	0.914459	0.143265	0.908365	0.808769	0.908396
cg25344401	0.918222	0.887624	0.15131	0.933799	0.815821	0.921808
cg09322573	0.908324	0.922917	0.152211	0.913867	0.793223	0.926262
cg16227748	0.908056	0.929472	0.08816	0.91566	0.342404	0.930849
cg22185977	0.863406	0.927321	0.141583	0.911489	0.762881	0.945984
cg21638533	0.913472	0.925444	0.154067	0.907707	0.741446	0.929915
cg17183174	0.897861	0.856626	0.121015	0.897118	0.678411	0.921259
cg11236746	0.91676	0.930661	0.136879	0.93672	0.543242	0.946237
cg14134003	0.890522	0.923891	0.140355	0.912004	0.672942	0.917964
cg24637417	0.89015	0.90681	0.118241	0.84262	0.678306	0.912596
cg13673563	0.924921	0.934629	0.188555	0.928695	0.870368	0.939672
cg25596405	0.953603	0.959743	0.179336	0.934439	0.689092	0.963488
cg01117339	0.917443	0.935159	0.143701	0.913228	0.595558	0.944147
cg02889869	0.896814	0.916979	0.153813	0.915379	0.73433	0.91947
cg11953794	0.946468	0.95608	0.14804	0.952353	0.448917	0.956753
cg11186858	0.940558	0.939362	0.153401	0.712473	0.936594	0.957634
cg02041484	0.910356	0.923018	0.161429	0.907383	0.737449	0.922076
cg02889973	0.879467	0.747802	0.101404	0.897041	0.718404	0.908334
cg21440776	0.883488	0.9027	0.151991	0.896562	0.778521	0.898614
cg20610950	0.929562	0.923073	0.141164	0.686678	0.932507	0.946582
cg01440934	0.904534	0.921618	0.165605	0.889425	0.797731	0.920778
cg11939496	0.921672	0.925813	0.147533	0.890493	0.629088	0.942624
cg23666117	0.927241	0.924242	0.168459	0.923679	0.709619	0.929654
cg15694422	0.954159	0.891953	0.180345	0.961465	0.717024	0.963582
cg05223392	0.884865	0.89312	0.134103	0.84707	0.751702	0.904576
cg09994756	0.066363	0.0884153	0.870112	0.0580532	0.346185	0.0479008
cg16002660	0.0558757	0.0432659	0.854495	0.046125	0.414667	0.0384037
cg15488596	0.0824387	0.117283	0.873227	0.0881549	0.308254	0.0533027
cg25911551	0.0631649	0.0451324	0.84552	0.100991	0.271362	0.0727891
cg24134182	0.0554411	0.0480754	0.860438	0.0783594	0.437671	0.0455939
cg24859236	0.0897156	0.0742526	0.884589	0.0787911	0.535492	0.0716661
cg11708690	0.117467	0.0769024	0.860908	0.0730261	0.336058	0.13494
cg08426898	0.0962754	0.0693774	0.857239	0.114206	0.347354	0.0912269
cg16265717	0.0623068	0.0664206	0.85422	0.0498186	0.578645	0.0416701
cg15118447	0.212212	0.0725864	0.909089	0.0882525	0.525659	0.2242
cg02466924	0.0887686	0.0600954	0.877332	0.0799109	0.633064	0.0971991
cg24627325	0.109374	0.0708449	0.864669	0.205633	0.290755	0.0973516
cg23553576	0.0692415	0.055394	0.873864	0.0704008	0.690113	0.0787585
cg26165286	0.0571512	0.0451206	0.866055	0.0614414	0.706788	0.0472604
cg08482167	0.0740914	0.0655116	0.895449	0.0670598	0.832491	0.0635716
cg07226481	0.145464	0.168127	0.857509	0.0859641	0.212152	0.160366
cg16934235	0.061099	0.101665	0.834137	0.112975	0.252864	0.200473
cg15408889	0.0582527	0.0506813	0.830344	0.274378	0.12158	0.038873
cg19884556	0.0779717	0.056768	0.791217	0.0757018	0.156573	0.0557788
cg16018921	0.07051	0.0504254	0.875856	0.0882565	0.732782	0.0532085
cg22594214	0.091613	0.0986839	0.821837	0.0547574	0.284351	0.134461
cg04462561	0.0997569	0.0508301	0.830766	0.0760874	0.24349	0.425899
cg03985360	0.0626395	0.0503677	0.876233	0.0501283	0.750722	0.215794
cg16786640	0.0977538	0.0575518	0.904829	0.149137	0.761886	0.0803682
cg26543150	0.0685687	0.0483725	0.874642	0.0525581	0.85535	0.0613905
cg08640619	0.0624779	0.049083	0.860921	0.0491616	0.791991	0.0438278
cg06436504	0.0716188	0.076787	0.905149	0.117784	0.911649	0.0538124
cg00404923	0.0623613	0.0459316	0.843323	0.0662244	0.665242	0.0546039
cg08407014	0.0773835	0.0624533	0.885634	0.0618301	0.906151	0.0501761
cg11217193	0.253785	0.100802	0.916348	0.11485	0.356973	0.702416
cg07413957	0.321694	0.0712078	0.877409	0.0905038	0.273269	0.269443
cg04376782	0.072482	0.129715	0.851122	0.0624215	0.579728	0.0566632
cg11559446	0.0785467	0.0573631	0.861851	0.0720504	0.654493	0.264192
cg00173005	0.0644225	0.160756	0.867345	0.0956477	0.603445	0.043042
cg11118690	0.0533072	0.0404825	0.840277	0.0584136	0.717679	0.04808
cg10852876	0.0534795	0.0404661	0.870679	0.0427884	0.953221	0.0361131
cg05869611	0.181854	0.0728537	0.836035	0.0860324	0.269735	0.260794
cg08015382	0.0818295	0.255408	0.874485	0.0563864	0.377789	0.390548
cg17200810	0.0676865	0.0676218	0.859982	0.0478533	0.82662	0.0386272
cg05777583	0.0746158	0.077925	0.821204	0.0938958	0.457367	0.0453228
cg01275661	0.0921829	0.27072	0.831352	0.071714	0.207668	0.0457987
cg20169521	0.047599	0.0548258	0.848606	0.0513921	0.815532	0.0374549
cg00482162	0.126323	0.102974	0.867877	0.100188	0.605385	0.1207
cg04874286	0.0669409	0.0543482	0.872005	0.0558024	0.932397	0.0524584
cg07093674	0.0353125	0.0347923	0.813958	0.0287434	0.698206	0.030157
cg13764350	0.0980166	0.0833271	0.874585	0.106885	0.740951	0.10236
cg08870914	0.0868539	0.0726074	0.874281	0.0752087	0.84969	0.0794861
cg23898497	0.0434589	0.0372885	0.817952	0.0379819	0.701296	0.0319123
cg22871947	0.0604768	0.06269	0.881471	0.0898226	0.956475	0.0455226
cg27023962	0.104469	0.398332	0.895636	0.0706879	0.396003	0.129753
cg13501446	0.886228	0.922251	0.959237	0.0744492	0.954488	0.934077
cg01275887	0.850713	0.903063	0.873373	0.0497391	0.956361	0.893637
cg04686264	0.88325	0.939358	0.948584	0.0859684	0.907132	0.939139
cg14534089	0.87102	0.84354	0.953352	0.0707714	0.940641	0.946862
cg09159452	0.882611	0.942252	0.963255	0.101548	0.896839	0.956385
cg20282303	0.913775	0.906647	0.972971	0.114019	0.96067	0.956098
cg22014112	0.932515	0.873898	0.96885	0.107496	0.930951	0.969859
cg10507988	0.895599	0.947788	0.951013	0.111204	0.928243	0.936104
cg02571204	0.871891	0.923764	0.952016	0.0937502	0.853261	0.945072
cg14196395	0.946375	0.957504	0.975792	0.153018	0.958031	0.976242
cg24334634	0.892421	0.938228	0.944497	0.122946	0.937615	0.942067
cg06282596	0.879002	0.883526	0.921496	0.102769	0.959137	0.931103
cg22853713	0.883352	0.955697	0.950846	0.114009	0.874603	0.876481
cg12711755	0.838337	0.924395	0.844054	0.064413	0.839867	0.92201
cg18236877	0.848418	0.884347	0.888154	0.0709	0.883384	0.860357
cg08368520	0.878903	0.897258	0.914495	0.0874026	0.85282	0.896556
cg20568402	0.892095	0.924391	0.927414	0.114866	0.915787	0.930406
cg09709142	0.929811	0.91119	0.964681	0.141341	0.956051	0.958846
cg07076109	0.912332	0.938218	0.941523	0.127136	0.89012	0.93601
cg04234758	0.918656	0.959431	0.85092	0.121287	0.947921	0.95593
cg00535785	0.940676	0.963077	0.967824	0.160596	0.958118	0.95555
cg16094026	0.853557	0.942245	0.896342	0.109574	0.932787	0.926034
cg04206484	0.950268	0.968879	0.975325	0.171729	0.972697	0.970587
cg27177779	0.88311	0.807158	0.944092	0.0962871	0.92611	0.955691
cg21496803	0.862332	0.965357	0.965334	0.140318	0.927841	0.942187
cg19960891	0.919416	0.900388	0.956551	0.121859	0.819741	0.954272
cg22618405	0.894727	0.795067	0.927034	0.0961525	0.933706	0.912332
cg23557746	0.9168	0.913215	0.937563	0.138569	0.933923	0.93574
cg13997788	0.864763	0.899089	0.942143	0.101211	0.799334	0.909885
cg06767326	0.914681	0.939532	0.9407	0.149232	0.936331	0.932998
cg16345114	0.913608	0.929587	0.945042	0.150013	0.941472	0.944183
cg03013917	0.922734	0.907271	0.954765	0.150787	0.941521	0.946881
cg12483545	0.824771	0.619308	0.94428	0.0497602	0.966931	0.914209
cg02818160	0.89568	0.932394	0.908051	0.11797	0.79609	0.934362
cg08841544	0.879183	0.668348	0.957053	0.0816078	0.935479	0.943183
cg01525669	0.941084	0.97822	0.956417	0.188355	0.975344	0.972354
cg03551062	0.895077	0.917481	0.932574	0.136174	0.872363	0.915133
cg26521186	0.906103	0.934965	0.93375	0.15655	0.926796	0.924701
cg07625619	0.893116	0.899653	0.926162	0.119143	0.782608	0.90733
cg25137155	0.852692	0.92102	0.926113	0.129169	0.880243	0.898879
cg03301165	0.901483	0.919076	0.936459	0.149457	0.902162	0.922738
cg19547972	0.878167	0.938008	0.955179	0.157679	0.91939	0.946225
cg08943107	0.928408	0.95426	0.897045	0.142757	0.789125	0.957156
cg16393713	0.897666	0.922035	0.938744	0.15312	0.903496	0.935988
cg08780218	0.839694	0.907506	0.898168	0.114666	0.861187	0.889333
cg16492584	0.910817	0.936618	0.938035	0.16407	0.923327	0.938878
cg06261500	0.908619	0.932087	0.944134	0.160179	0.900583	0.926252
cg00132008	0.917124	0.923174	0.937911	0.165386	0.942853	0.931923
cg26209730	0.849945	0.896586	0.644131	0.0539363	0.875209	0.905706
cg00097800	0.905726	0.927057	0.951819	0.164649	0.917619	0.927673
cg01833196	0.0971424	0.0900843	0.093696	0.879966	0.0294599	0.0595798
cg05232694	0.0863782	0.0490238	0.0952816	0.895955	0.233749	0.0552942
cg11751645	0.0985622	0.104903	0.0490967	0.869073	0.0466007	0.0710803
cg23735712	0.0756112	0.177249	0.0298401	0.869501	0.0252516	0.0394798
cg00585901	0.060437	0.0413231	0.0320166	0.8292	0.0211021	0.0311996
cg04855216	0.111279	0.0731271	0.0669032	0.857593	0.0839904	0.079066
cg27592331	0.0935311	0.0918116	0.0703333	0.856685	0.0703861	0.0914482
cg04917391	0.113065	0.0736318	0.0441063	0.852209	0.143939	0.0514195
cg04707519	0.120792	0.0811149	0.0645298	0.854164	0.0751181	0.112161
cg03717588	0.116743	0.275917	0.0567072	0.888355	0.0529801	0.0657273
cg06485940	0.140666	0.165461	0.0814741	0.872167	0.0499609	0.105066
cg09210519	0.0416318	0.088757	0.0547705	0.810423	0.0222446	0.0366096
cg00714725	0.0345623	0.0283045	0.0217428	0.780566	0.0208289	0.0235625
cg23929284	0.0785864	0.0403334	0.078626	0.805346	0.0185836	0.0387924
cg06550177	0.0800468	0.111396	0.374546	0.914214	0.0338509	0.246733
cg18675043	0.0343143	0.0263691	0.0290299	0.771863	0.0251739	0.0256245
cg01517680	0.133597	0.0936384	0.0680456	0.840883	0.0912074	0.121009
cg21927177	0.0815662	0.0368455	0.0328245	0.790696	0.0304411	0.128239
cg11837293	0.131288	0.101894	0.0658611	0.884109	0.40579	0.148462
cg24361265	0.126766	0.167461	0.281368	0.940018	0.401678	0.0618412
cg09455881	0.261159	0.100195	0.047918	0.865756	0.116101	0.310566
cg24406240	0.0675401	0.0524566	0.0388899	0.82649	0.416634	0.0383988
cg16269733	0.0799522	0.263699	0.0416935	0.832116	0.0648838	0.0451865
cg18563999	0.0784211	0.1125	0.0353507	0.782832	0.0191455	0.0411144
cg13974464	0.0750102	0.033594	0.202663	0.827376	0.170449	0.0398409
cg12110262	0.14846	0.260687	0.127435	0.875035	0.114853	0.0880807
cg14375937	0.0590362	0.0329257	0.027038	0.74491	0.0213434	0.0392508
cg14447606	0.125847	0.0769189	0.0593914	0.78548	0.0245209	0.102967
cg15141467	0.0350577	0.0261165	0.0250522	0.734399	0.0257574	0.0304691
cg24338833	0.135729	0.0989535	0.114731	0.81508	0.0648896	0.129788
cg24458609	0.16027	0.306263	0.0896668	0.864187	0.0537798	0.114765
cg07000334	0.0525647	0.0676459	0.0332348	0.748781	0.0353219	0.038747
cg01280080	0.102806	0.0836654	0.180206	0.825962	0.172839	0.0967344
cg12455762	0.147295	0.189634	0.0591847	0.815012	0.057853	0.0852735
cg18813353	0.0467015	0.0959172	0.0341145	0.74938	0.0321406	0.0311076
cg17344048	0.13657	0.324574	0.06453	0.867319	0.139054	0.193833
cg01131038	0.0552524	0.0360084	0.0359574	0.733766	0.0169945	0.0414365
cg08478871	0.089303	0.0628258	0.0388993	0.753734	0.0314963	0.0624375
cg24452821	0.111223	0.523975	0.0541858	0.880579	0.0254247	0.0622839
cg26828839	0.155007	0.0801031	0.0568793	0.786312	0.0277471	0.20437
cg17655624	0.0629179	0.0641085	0.0354276	0.741325	0.0379066	0.0422182
cg04120686	0.186733	0.156807	0.0754005	0.816463	0.0340636	0.173372
cg27071152	0.115907	0.0394388	0.0396615	0.751884	0.0468378	0.0736035
cg01425666	0.480083	0.256939	0.143126	0.944713	0.0398466	0.340797
cg15627089	0.0682414	0.0278348	0.0317274	0.724254	0.0214512	0.0651487
cg07990843	0.163376	0.101738	0.0804417	0.781433	0.026438	0.131779
cg24368383	0.170379	0.467971	0.065081	0.875526	0.0220315	0.171018
cg25736251	0.118116	0.286167	0.0552374	0.80824	0.0484729	0.0584537
cg05020685	0.172397	0.385941	0.072823	0.852765	0.0358669	0.130723
cg21878746	0.316595	0.151857	0.0677924	0.855533	0.0545571	0.493646
cg07116712	0.977965	0.965955	0.739344	0.97924	0.0274043	0.982714
cg25574765	0.971233	0.976306	0.894281	0.784353	0.0252236	0.975223
cg00903584	0.944095	0.943656	0.770208	0.949357	0.0349275	0.950931
cg18440839	0.956638	0.897435	0.679156	0.974987	0.0187078	0.981164
cg26769700	0.948884	0.959856	0.85618	0.955906	0.0674952	0.961625
cg01681367	0.945531	0.947878	0.63408	0.952053	0.0151527	0.964106
cg14083015	0.947322	0.950381	0.76753	0.888688	0.0456095	0.952209
cg27284288	0.944023	0.909834	0.779564	0.953982	0.0593135	0.957929
cg26427109	0.947844	0.939062	0.603675	0.952248	0.0268962	0.955163
cg08578703	0.924514	0.94197	0.772179	0.819357	0.0389743	0.931157
cg10836110	0.957415	0.96389	0.510733	0.927471	0.021575	0.976788
cg00713294	0.908181	0.896514	0.839737	0.918847	0.0660966	0.918325
cg22136363	0.975829	0.977071	0.784146	0.982741	0.10978	0.982756
cg18723409	0.96776	0.9675	0.727147	0.971433	0.092024	0.971316
cg24904788	0.800592	0.869648	0.79016	0.907576	0.020638	0.794233
cg08858130	0.927073	0.948377	0.793571	0.92236	0.0852917	0.941647
cg21937128	0.920993	0.876658	0.828457	0.927368	0.0778714	0.937654
cg00446123	0.973653	0.959043	0.969848	0.97986	0.158046	0.980717
cg03052794	0.727132	0.92637	0.860881	0.938072	0.0356826	0.584606
cg16087093	0.950399	0.956973	0.388216	0.979082	0.0195347	0.966873
cg26769927	0.94898	0.866739	0.565374	0.932866	0.0296251	0.965729
cg05711036	0.932841	0.963364	0.654074	0.954314	0.0757493	0.962475
cg07380416	0.919533	0.851348	0.635431	0.921389	0.0344776	0.937459
cg08480068	0.956614	0.849084	0.502516	0.930227	0.0170546	0.977697
cg14999168	0.899607	0.886141	0.69964	0.884841	0.0459493	0.906185
cg26247093	0.942808	0.95979	0.667714	0.959562	0.0868525	0.949276
cg24216596	0.941679	0.893332	0.747923	0.769716	0.0521907	0.961809
cg21201401	0.959828	0.858416	0.940852	0.968185	0.142325	0.971854
cg27125093	0.86717	0.829487	0.703603	0.888968	0.0351584	0.880846
cg00240653	0.860248	0.891247	0.708253	0.886781	0.0497492	0.877118
cg09050670	0.958745	0.96979	0.721688	0.769827	0.0731007	0.970025
cg03167633	0.893473	0.936245	0.890577	0.687218	0.0678957	0.910173
cg14082893	0.869197	0.851948	0.706525	0.917046	0.0362163	0.61982
cg02030929	0.897882	0.916473	0.48061	0.898619	0.0238444	0.923996
cg24706505	0.891126	0.918142	0.740932	0.896581	0.0849559	0.896649
cg09897970	0.946237	0.95085	0.342609	0.922491	0.0235447	0.973997
cg17006136	0.94722	0.956201	0.283546	0.958008	0.0188128	0.960997
cg10576280	0.73012	0.8928	0.774717	0.886674	0.0526587	0.959158
cg10491452	0.926036	0.831034	0.703998	0.92359	0.0750722	0.93555
cg18384097	0.916555	0.930665	0.732154	0.927493	0.103543	0.927946
cg18087306	0.957941	0.921417	0.686071	0.942078	0.108698	0.968641
cg13555415	0.953848	0.94392	0.69167	0.943721	0.114824	0.960816
cg21939215	0.910186	0.816117	0.642105	0.91845	0.0553847	0.917399
cg14106719	0.858717	0.858688	0.65063	0.7701	0.0198589	0.890556
cg25045219	0.891617	0.932478	0.835575	0.920113	0.126251	0.898403
cg22210337	0.827633	0.966515	0.408118	0.935634	0.0173541	0.802495
cg21225548	0.891835	0.856658	0.645424	0.856185	0.0500973	0.901216
cg20784693	0.938706	0.649095	0.841155	0.954061	0.0874617	0.975312
cg15836722	0.891864	0.809572	0.771675	0.924144	0.0862578	0.89747
cg03699843	0.935577	0.940846	0.641764	0.924943	0.0997318	0.939101
cg10095954	0.031924	0.0605444	0.22066	0.0286406	0.959257	0.0250955
cg22434923	0.0411065	0.0421598	0.075094	0.0402472	0.925523	0.0389113
cg17601191	0.0455638	0.0485841	0.07121	0.0365418	0.926091	0.0408569
cg20918393	0.023566	0.0346491	0.0558647	0.016613	0.896478	0.468961
cg03062944	0.0338904	0.0287065	0.222125	0.088894	0.917237	0.0392189
cg06617636	0.0413509	0.0422323	0.235902	0.0379978	0.941984	0.569791
cg07904475	0.0726456	0.0673573	0.293078	0.0345979	0.935436	0.0468601
cg18356785	0.0769527	0.0313655	0.477025	0.0265288	0.967694	0.0359112
cg18856478	0.0306362	0.0281441	0.447	0.0802822	0.956612	0.0294348
cg26256263	0.036684	0.149304	0.334459	0.0753909	0.953923	0.0195387
cg07795766	0.0872372	0.0474558	0.229952	0.165531	0.945587	0.15491
cg12050271	0.130867	0.0140819	0.234163	0.0178277	0.904964	0.181821
cg25139229	0.0392709	0.0579341	0.58527	0.0815752	0.975749	0.0344891
cg03729251	0.120535	0.0674491	0.505143	0.0556547	0.969887	0.102901
cg20061654	0.085482	0.0478744	0.315033	0.1743	0.941574	0.18179
cg02190353	0.052037	0.0456904	0.0653078	0.0445628	0.835773	0.0513962
cg21935981	0.0756022	0.0300665	0.246058	0.117677	0.903307	0.187794
cg02792168	0.323574	0.0277358	0.149038	0.0427863	0.924803	0.280004
cg16402452	0.059321	0.0582467	0.338381	0.0576196	0.902812	0.057258
cg19458020	0.0292452	0.0352776	0.344682	0.0234416	0.880092	0.0215348
cg23478547	0.0203001	0.0428773	0.0457111	0.0176442	0.80484	0.0166351
cg06482498	0.0574695	0.0606184	0.245373	0.0677081	0.87638	0.0530411
cg05485060	0.0500816	0.0464715	0.283853	0.139289	0.902511	0.149882
cg01089914	0.0572865	0.174058	0.439269	0.0720681	0.941401	0.0593696
cg27500148	0.102606	0.0180268	0.570869	0.020838	0.934677	0.0695263
cg22507723	0.0579141	0.0361635	0.365262	0.0338022	0.881506	0.137264
cg24729879	0.0640124	0.0413555	0.162367	0.0510194	0.839715	0.123027
cg15408497	0.0867263	0.0436218	0.239434	0.0358263	0.865335	0.219915
cg24757533	0.0313633	0.0319606	0.28031	0.0180197	0.843106	0.0290419
cg02772995	0.0608987	0.0502412	0.253561	0.0492751	0.856459	0.059416
cg04392266	0.0260797	0.0308725	0.598199	0.0321243	0.917997	0.023042
cg07776993	0.031059	0.102103	0.673124	0.125554	0.974458	0.0242045
cg08614871	0.0288142	0.0313555	0.127459	0.0306696	0.805956	0.0307949
cg08169020	0.0169673	0.0177826	0.054881	0.0169759	0.776293	0.0243645
cg21921272	0.0586463	0.0431215	0.587572	0.0449871	0.921534	0.0550173
cg20806180	0.0888961	0.0847323	0.443903	0.0685943	0.908927	0.0387765
cg25066665	0.0954184	0.0267419	0.575903	0.030389	0.919406	0.064379
cg24006721	0.0483507	0.112163	0.319093	0.0741313	0.876886	0.0501932
cg09074856	0.159274	0.0467574	0.418923	0.0425357	0.912764	0.211994
cg07996594	0.130526	0.0421055	0.286933	0.0364846	0.869888	0.194958
cg00583861	0.0546812	0.0662584	0.523015	0.0815764	0.915694	0.101327
cg14266527	0.0944174	0.0568333	0.337619	0.0462172	0.869484	0.0791624
cg04904276	0.0400735	0.0335044	0.45341	0.038836	0.872995	0.0392559
cg16563470	0.276954	0.0943101	0.372719	0.0490583	0.951522	0.456368
cg03577139	0.0350618	0.0295105	0.427834	0.069579	0.870675	0.0319097
cg15000222	0.05095	0.0339756	0.704383	0.0330007	0.931532	0.0351575
cg04985582	0.102021	0.0737037	0.126231	0.0756075	0.830689	0.0948168
cg14216068	0.111586	0.160921	0.504672	0.0853065	0.950674	0.236573
cg20821842	0.0455702	0.172952	0.446982	0.244674	0.948436	0.0381971
cg00892742	0.0925066	0.0725927	0.568299	0.0566975	0.924721	0.116664
cg00263677	0.857833	0.961632	0.964982	0.957383	0.937731	0.130078
cg25504605	0.871912	0.957718	0.955724	0.954277	0.95921	0.173453
cg26247168	0.434475	0.974803	0.942487	0.948949	0.908668	0.0923723
cg09610311	0.467931	0.833444	0.950829	0.960367	0.865513	0.0735868
cg12593873	0.892077	0.927953	0.9487	0.831078	0.941893	0.195749
cg03893663	0.625336	0.929231	0.926282	0.913272	0.779412	0.136
cg19368383	0.841197	0.93781	0.93816	0.935973	0.865914	0.203744
cg09638264	0.854972	0.889569	0.942201	0.931996	0.899727	0.211431
cg16581103	0.77477	0.85392	0.925332	0.937845	0.799655	0.175487
cg01553090	0.587373	0.951238	0.931091	0.94291	0.879842	0.174268
cg22333800	0.865865	0.899636	0.94164	0.889896	0.748293	0.198793
cg13005635	0.811549	0.708399	0.936528	0.924143	0.778122	0.159344
cg03766264	0.826447	0.912263	0.927694	0.912124	0.874398	0.216284
cg27006252	0.75527	0.922079	0.940051	0.928267	0.921445	0.215905
cg18191867	0.521802	0.931916	0.933667	0.942183	0.937898	0.17097
cg02927618	0.840162	0.925023	0.803911	0.933827	0.692726	0.178284
cg17999916	0.419045	0.93351	0.917205	0.929022	0.902787	0.140448
cg07888040	0.894247	0.950893	0.956738	0.91465	0.894387	0.25292
cg00899463	0.789826	0.929061	0.912601	0.878379	0.697442	0.186164
cg25016420	0.796379	0.879477	0.918061	0.893595	0.677961	0.179369
cg16576895	0.865615	0.930769	0.93032	0.921387	0.917428	0.245388
cg05301494	0.66048	0.894981	0.89641	0.898359	0.862415	0.174563
cg22906553	0.643503	0.89718	0.895379	0.836545	0.802384	0.150821
cg08175413	0.565211	0.875864	0.819961	0.933949	0.804737	0.134679
cg12839363	0.824012	0.813771	0.92093	0.92198	0.773212	0.193491
cg00565679	0.866461	0.891845	0.897543	0.935286	0.667304	0.204485
cg06873606	0.488256	0.92606	0.919458	0.901925	0.911105	0.160589
cg00959749	0.751699	0.77808	0.923159	0.905588	0.813957	0.175689
cg23990236	0.545403	0.906961	0.90552	0.889878	0.895287	0.162785
cg05842260	0.648924	0.958191	0.952455	0.916048	0.855926	0.210037
cg04165508	0.885682	0.943695	0.937009	0.936612	0.772348	0.250172
cg01534613	0.885059	0.895326	0.933223	0.883027	0.914794	0.247588
cg03986418	0.698061	0.811746	0.902773	0.912098	0.911309	0.189275
cg05385805	0.433757	0.944952	0.91639	0.920345	0.833848	0.156668
cg14499387	0.420174	0.932987	0.906388	0.915129	0.887956	0.154839
cg03411644	0.461648	0.91462	0.819411	0.926872	0.754047	0.128847
cg01930947	0.479383	0.816382	0.912655	0.885558	0.883053	0.138973
cg21746409	0.841107	0.867546	0.881479	0.901277	0.672078	0.201689
cg11033588	0.468956	0.908128	0.878105	0.921524	0.766849	0.149415
cg19422140	0.86049	0.834565	0.931971	0.890352	0.797232	0.228189
cg23822644	0.466631	0.937145	0.923284	0.883722	0.892031	0.173313
cg18440774	0.698179	0.792303	0.908813	0.784906	0.908042	0.174405
cg00739155	0.585895	0.866936	0.872784	0.86846	0.728092	0.155075
cg05546575	0.809607	0.897058	0.906439	0.893447	0.844557	0.239625
cg16439608	0.472777	0.874185	0.74625	0.857665	0.661188	0.0966693
cg18756657	0.513793	0.760179	0.827432	0.892459	0.742678	0.116518
cg00453717	0.761576	0.92308	0.718937	0.919895	0.812923	0.197818
cg10409560	0.751872	0.854552	0.917709	0.833782	0.801214	0.204687
cg20203365	0.479362	0.882068	0.780331	0.852564	0.720063	0.117935
cg11254726	0.748778	0.910511	0.914924	0.622053	0.7157	0.161542
cg13289884	0.2038	0.037623	0.0414324	0.0423051	0.0453833	0.810667
cg06916239	0.543034	0.0366295	0.0488721	0.0397488	0.0316613	0.809976
cg23053573	0.221219	0.0367266	0.0326534	0.0355674	0.0289181	0.730657
cg10454246	0.440598	0.0323724	0.0431464	0.0358398	0.022729	0.770896
cg19371349	0.495854	0.110693	0.0598199	0.12798	0.0244072	0.817085
cg15100426	0.393283	0.0299547	0.188018	0.0366185	0.367791	0.82291
ch.1.1540554F	0.190346	0.167439	0.188699	0.163537	0.0386249	0.789829
cg09642670	0.527276	0.0982222	0.0644559	0.0907323	0.0234988	0.801624
cg24318728	0.520788	0.0682836	0.197051	0.0513055	0.258301	0.843092
cg05306070	0.520081	0.0975657	0.0997035	0.104342	0.0850118	0.812655
cg00643111	0.395516	0.0372054	0.0477301	0.0449604	0.0342186	0.730972
cg15281283	0.304834	0.0514605	0.0478925	0.0594344	0.0523789	0.719698
cg14650610	0.510306	0.0314418	0.0494771	0.0397947	0.0250161	0.752513
cg27170458	0.0961245	0.0648877	0.0687696	0.0610948	0.0435697	0.677393
cg07571509	0.421431	0.0237435	0.0449693	0.0342274	0.0224116	0.724967
cg13348059	0.382097	0.0349898	0.0422188	0.0381948	0.037299	0.720353
cg03156769	0.0341352	0.0269206	0.0282343	0.0292682	0.0379497	0.633275
cg22453435	0.20957	0.143905	0.0488579	0.0452561	0.0478286	0.705611
cg06538549	0.24606	0.156869	0.220315	0.0806767	0.137558	0.770968
cg01251150	0.424034	0.0457348	0.0517175	0.13539	0.0349136	0.744054
cg00097146	0.452798	0.0309254	0.0545782	0.0413726	0.016006	0.721333
cg12435551	0.443161	0.0393723	0.0645036	0.0376517	0.0787868	0.727827
cg26475911	0.528086	0.0420215	0.158241	0.0648477	0.265617	0.796796
cg11827910	0.502142	0.12504	0.0561072	0.0620927	0.0246376	0.755169
cg18522931	0.0929989	0.476972	0.0495698	0.108418	0.303144	0.784708
cg27232866	0.490942	0.165333	0.0596541	0.0500972	0.0249471	0.757161
cg24302235	0.512194	0.127785	0.0656156	0.112994	0.0269832	0.768299
cg01116137	0.127034	0.0675455	0.0670837	0.0775069	0.264606	0.693361
ch.6.107549394R	0.27109	0.384945	0.135176	0.358294	0.0337761	0.84037
cg09431416	0.468637	0.0909686	0.0729308	0.0665702	0.031585	0.738749
cg07047068	0.475745	0.0281702	0.0843002	0.0350587	0.0673763	0.722957
cg15376615	0.441233	0.0251346	0.0433427	0.0267591	0.0231283	0.697094
cg07346310	0.249678	0.0819243	0.063663	0.069959	0.0475479	0.682764
cg12065285	0.528452	0.0986039	0.112235	0.105996	0.153862	0.777695
cg19190728	0.489215	0.0458717	0.0628893	0.0530634	0.052568	0.719884
cg14487131	0.444858	0.0259859	0.0423351	0.030757	0.0243742	0.690196
cg12534147	0.446368	0.0557263	0.0472238	0.0481152	0.0271064	0.70121
cg15992563	0.456412	0.0266127	0.0486164	0.0271392	0.0443528	0.690564
cg02685016	0.497579	0.191728	0.0745644	0.0658099	0.0388117	0.745604
cg19446990	0.479758	0.126194	0.148829	0.140977	0.103792	0.768032
cg03976877	0.464383	0.0415062	0.0662195	0.0546542	0.035825	0.700038
cg18565216	0.567379	0.16273	0.179884	0.0862608	0.231361	0.802522
cg20939084	0.527306	0.144028	0.12073	0.0874938	0.0892221	0.75489
cg16398761	0.173061	0.136147	0.129118	0.0193197	0.016962	0.651782
cg08578023	0.511173	0.158863	0.0738493	0.143928	0.0661335	0.749794
cg21642245	0.502927	0.121023	0.124131	0.105777	0.0493236	0.740191
cg14255417	0.347782	0.303333	0.0456299	0.0442475	0.236367	0.738621
cg06818532	0.262408	0.0310701	0.0368761	0.0342159	0.0272042	0.629031
cg03046812	0.478018	0.0435079	0.0919265	0.053283	0.0800212	0.701149
cg06688989	0.40812	0.0362671	0.0583056	0.314294	0.0376686	0.7247

## Sheet: s9_s10_legend
column name	description
cpg	cpg id
Trophoblasts	mean trophoblast DNAm
Stromal	mean Stromal DNAm
Hofbauer	mean Hofbauer DNAm
Endothelial	mean Endothelial DNAm
nRBC	mean nRBC DNAm
Syncytiotrophoblast	mean syncytiotrophoblast DNAm
s9: first trimester reference cpgs
s10: term reference cpgs

[truncated: 4 more sheets: s11, s11_legend, s12, s12_legend]
